# Supplementary material for: Cytoprotection by a naturally occurring variant of ATP5G1 in Arctic ground squirrel neural progenitor cells
Source: eLife. 2020 Oct 14;9:e55578. doi: 10.7554/eLife.55578 (PMC7671683; doi:10.7554/eLife.55578)
Supplement: Supplementary file 1. [file elife-55578-supp1.xlsx]

## Sheet: Hypoxia only
Transcripts present in hypoxia treated cells
Gene Symbol	Gene Name	Human Gene ID	AGS Gene ID
HNRNPC	Heterogeneous nuclear ribonucleoprotein C	3183	113200679
STIL	STIL centriolar assembly protein	6491	113198086
SOCS5	Suppressor of cytokine signaling 5	9655	113180617
FH	Fumarate hydratase	2271	113184142
RAB18	RAB18, member RAS oncogene family	22931	113198021
SARS	Seryl-tRNA synthetase	6301	113192611
PRPF31	Pre-mRNA processing factor 31	26121	113176665
COX7C	Cytochrome c oxidase subunit 7C	1350	113196932
PSMD14	Proteasome 26S subunit, non-ATPase 14	10213	113185843
R3HDM1	R3H domain containing 1	23518	113182065
RALB	RAS like proto-oncogene B	5899	113196789
ACTR3	Actin related protein 3	10096	113188678
GPM6B	Glycoprotein M6B	2824	113187380
RBBP7	RB binding protein 7, chromatin remodeling factor	5931	113188414
RPL8	Ribosomal protein L8	6132	113197504
VPS28	VPS28 subunit of ESCRT-I	51160	113197517
ADCK5	aarF domain containing kinase 5	203054	113197467
1	MAF1 homolog, negative regulator of RNA polymerase III	84232	113197495
PLEC	Plectin	5339	113197464
EEF1D	Eukaryotic translation elongation factor 1 delta	1936	113197482
PTK2	Protein tyrosine kinase 2	5747	113192818
NDUFB9	NADH:ubiquinone oxidoreductase subunit B9	4715	113195458
EMC2	ER membrane protein complex subunit 2	9694	113179808
RPL39L	Ribosomal protein L39-like	116832	113200555
MTDH	Protein LYRIC	92140	113177375
NUSAP1	Nucleolar and spindle associated protein 1	51203	113183787
ZNF106	Zinc finger protein 106	64397	113183936
CCNDBP1	Cyclin D1 binding protein 1	23582	113184742
PDIA3	Protein disulfide isomerase family A member 3	2923	113184016
EID1	EP300 interacting inhibitor of differentiation 1	23741	113184038
COPS2	COP9 signalosome subunit 2	9318	113184728
RFC4	Replication factor C subunit 4	5984	113183106
GABPB1	GA binding protein transcription factor subunit beta 1	2553	113184044
TMOD2	Tropomodulin 2	29767	113183662
LEO1	LEO1 homolog, Paf1/RNA polymerase II complex component	123169	113184223
SLTM	SAFB like transcription modulator	79811	113180006
SNX1	Sorting nexin 1	6642	113180057
SNX22	Sorting nexin 22	79856	113180088
RANBP1	RAN binding protein 1	5902	113191810
OAZ2	Ornithine decarboxylase antizyme 2	4947	113180007
CSNK1G1	Casein kinase 1 gamma 1	53944	113180043
PIAS1	E3 SUMO-protein Ligase	8554	113196737
UACA	Uveal autoantigen with coiled-coil domains and ankyrin repeats	55075	113182089
PKM	Pyruvate kinase M1/2	5315	113182011
CD276	CD276 molecule	80381	113182044
CLK3	CDC like kinase 3	1198	113181987
SCAPER	S-phase cyclin A associated protein in the ER	49855	113182023
UBE2Q2	Ubiquitin conjugating enzyme E2 Q2	92912	113190942
IDH3A	Isocitrate dehydrogenase 3 (NAD(+)) alpha	3419	113190976
TMCO3	Transmembrane and coiled-coil domains 3	55002	113189650
COL4A2	Collagen type IV alpha 2 chain	1284	113190301
PCCA	Propionyl-CoA carboxylase subunit alpha	5095	113190141
UGGT2	UDP-glucose glycoprotein glucosyltransferase 2	55757	113190358
DZIP1	DAZ interacting zinc finger protein 1	22873	113190489
OXSR1	Oxidative stress responsive kinase 1	9943	113194637
SLC22A14	Solute carrier family 22 member 14	9389	113194495
SLC22A13	Solute carrier family 22 member 13	9390	113195299
IPO5	Importin 5	3843	113190259
NALCN	Sodium leak channel, non-selective	259232	113190334
TKT	Transketolase	7086	113182636
AK2	Adenylate kinase	204	113195343
HNRNPA2B1	Heterogeneous nuclear ribonucleoprotein A2/B1	3181	113190719
FAM45A	Family with sequence similarity 45 member A	404636	113179552
LDHA	Lactate dehydrogenase A	3939	113200889
RPL37A	Ribosomal protein L37a	6168	113192270
RPL24	Ribosomal protein L24	6152	113193160
MAGED1	MAGE family member D1	9500	113177070
VEGFD	Vascular endothelial growth factor D	2277	113188444
SIRT1	Sirtuin 1	23411	113187010
TMEM127	Transmembrane protein 127	55654	113200598
RASA2	RAS p21 protein activator 2	5922	113180226
DSCAM	Down syndrome adhesion molecule	1826	113190221
ppp1r3b	Protein Phosphatase 1 Regulatory Subunit 3B	79660	113192719
C6orf165	C6orf165	154313	113198507
CREB/ATF1	CREB/ATF1	58487	113179933
ZBTB44	Zinc Finger And BTB Domain Containing 44	29068	113185334
AGBL1	Cytosolic carboxypeptidase 4	123624	113199619
ASAH1	Acid Ceramidase isoform C	427	113183191
CACB1	Voltage dependent L-type CaKam-a	782	113181406
DDX31	DEAD-box helicase 31	64794	113187622
SCN7A	Sodium Voltage-Gated Channel Alpha Subunit 7	6332	113198417
sgf29	SAGA associated factor 29	112869	113185132
C7orf57	C7orf57 homolog	136288	113198767
C14orf132	C14orf132 homolog	56967	113190232
NEMF	Nuclear export mediator factor	9147	113184402
Nmrk2	Nicotinamide Riboside Kinase 2	27231	113193666
ZNF200	Zinc finger protein 200	7752	113180374
BRD4	Bromodomain containing protein-4	23476	113183716
NF1	Neurofibromatosis-1	4763	113182858
PC	Pyruvate Carboxylase	5125	113186549
HDLBP	High density lipoprotein binding protein	3069	113201177
TMPO	Thymopoietin	7112	113188884
YWHAB	Tyrosine 3-monooxygenase/tryptophan 5-monooxygenase activation protein beta	7529	113196413
LRP6	LDL receptor related protein 6	4040	113199236
ZNF91	Zinc finger protein 91	7644	113197251

## Sheet: Hypothermia only
Transcripts present in hypothermia treated cells
Gene Symbol	Gene Name	Human Gene ID	AGS Gene ID
ISPD	Isoprenoid synthase domain containing	729920	113196661
SCAMP2	Secretory carrier membrane protein 2	10066	113181997
RCC2	Regulator of chromosome condensation 2	55920	113191146
SRSF4	Serine and arginine rich splicing factor 4	6429	113184796
TOIP1	Torsin-1A-interacting protein	26092	113182518
RPL35	Ribosomal protein L35	11224	113181150
CSTF3	Cleavage stimulation factor, 3' pre-RNA, subunit 3	1479	113194041
ZNF207	Zinc finger protein 207	7756	113182761
PAFAH1B2	Platelet activating factor acetylhydrolase 1b catalytic subunit 2	5049	113188164
RFC2	Replication factor C subunit 2	5982	113188583
ZBED4	Zinc finger BED-type containing 4	9889	113200192
ASCC2	Activating signal cointegrator 1 complex subunit 2	84164	113200071
BCAS1	Breast carcinoma amplified sequence 1	8537	113184338
P3H2	Prolyl 3-hydroxylase 2	55214	113183124
PRUNE1	Prune exopolyphosphatase 1	58497	113193399
LDB1	LIM domain binding 1	8861	113196146
ATRX	ATRX, chromatin remodeler	546	113194498
RHOC	rho-related GTP-binding protein RhoC precursor	389	113186628
GHITM	Growth hormone inducible transmembrane protein	27069	113188620
AMDHD2	Amidohydrolase domain containing 2	51005	113180533
CPTP	Ceramide-1-phosphate transfer protein	80772	113201266
UHMK1	U2AF homology motif kinase 1	127933	113199623
CD151	CD151	977	113175155
MPP1	Membrane palmitoylated protein 1	4354	113177415
GNPDA1	Glucosamine-6-Phosphate Deaminase 1	10007	113179701
ACADM	Acyl-CoA dehydrogenase medium chain	34	113197520
NUP155	Nucleoporin 155	9631	113191903
COPZ1	Coatomer protein complex subunit zeta 1	22818	113189749
PMS1	Postmeiotic Segregation Increased Homolog 1	5378	113182940
PRIMPOL	Primase And DNA Directed Polymerase	201973	113191014
NDUFS1	NADH:Ubiquinone Oxidoreductase Core Subunit S1	4719	113186958
Steap3	STEAP3 Metalloreductase	55240	113198008
LIMS2	LIM Zinc Finger Domain Containing 2	55679	113182506
NIFK	nucleolar protein interacting with the FHA domain of MKI67	84365	113196788
TMEM177	Transmembrane protein 177	80775	None1
PARPBP	PARP1 binding protein	55010	113189316
TALDO1	Transaldolase 1	6888	113175161
CCDC148	Coiled-coil domain containing 148	130940	113191654
TRIM28	Tripartite motif containing 28	10155	113175470
MEMO1	Mediator of cell motility 1	51072	113180739
EIF3CL	Eukaryotic translation initiation factor 3 subunit C like	728689	113185111
HNRH1	Heterologous ribonucleoprotein H	3187	113200740
SCML2	Scm polycomb group protein like	10389	113188443
ATXN7L1	Ataxin 7 like 1 (ATXN7L1),	222255	113187764
GTF2H5	General transcription factor IIH subunit 5	404672	113186402
TRIM23	Tripartite motif containing 23	373	113184204
TMEM222	Transmembrane protein 222	84065	113184807
RPL19	Ribosomal protein 19	6143	113181392
APEX1	Apurinic/apyrimidinic endodeoxyribonuclease 1	328	113199118
RPA2	Replication protein A2	6118	113184761
PHC2	Polyhomeotic homolog 2	1912	113195322
CDC20	CDC20	991	113189132
Dhx15	DEAH box polypeptide 15	1665	113192839
PSMC2	Proteasome 26S subunit 7	5701	113180122
SLC25A5	ADP/ATP translocase 2	292	113196959
ARHGAP21	Rho GTPase activating protein 21	57584	113191442
PSME3	Proteasome activator subunit 3	10197	113181286
RPS19BP1	Active regulator of SIRT1	91582	113194724
SLC25A3	Phosphate carrier protein, mitochondrial	5250	113188725
CBFB	Core-binding factor subunit beta	865	113200024
PANK2	Pantothenate kinase 2	80025	113180676
TRMT61B	tRNA methyltransferase 61B	55006	113198873
SPDYA	Speedy/RINGO cell cycle regulator family member A	245711	113198956
PPP4C	Protein phosphatase 4 catalytic subunit	5531	113176457
PDHB	Pyruvate dehydrogenase E1 beta subunit	5162	113192047
STT3B	STT3B, catalytic subunit of the oligosaccharyltransferase complex	201595	113194621
MLH1	mutL homolog 1	4292	113194739
LRRC41	Leucine rich repeat containing 41	10489	113189073
RPLS12	40S Ribosomal protein S12	6206	113186663
RBPJ	Recombination signal binding protein for immunoglobulin kappa J region	3516	113193333
PPIA	Peptidylprolyl isomerase A	5478	113190262
TMEM33	Transmembrane protein 33	55161	113180708
GABAARa2	gamma-aminobutyric acid type A receptor alpha2 subunit	2555	113180973
CEP135	Centrosomal protein 135	9662	113180916
KIAA1217	KIAA1217	56243	113191447
ENKUR	TRPC channel interacting protein	219670	113191456
NPC1	NPC intracellular cholesterol transporter 2	4864	113182244
TMED8	Transmembrane p24 trafficking protein family member 8	283578	113192041
RANGAP1	Ran GTPase activating protein 1	5905	113194707
TPM3	Tropomyosin 3	7170	113199819
SENP8	SUMO peptidase family member, NEDD8 specific	123228	113182051
GPC6	Glypican 6	10082	113190517
USPL1	Ubiquitin specific peptidase like 1	10208	113182468
CRTAP	Cartilage associated protein	10491	113195260
CMPK1	Cytidine/uridine monophosphate kinase 1	51727	113198081
ABHD17C	Abhydrolase domain containing 17C	58489	113182321
GDI2	GDP dissociation inhibitor 2	2665	113184911
IRF2BP2	Interferon regulatory factor 2 binding protein 2	359948	113199714
OCRL	Inositol polyphosphate-5-phosphatase F	4952	113200407
GEN1	Holliday junction 5' flap endonuclease	348654	113193203
EIF4B	Eukaryotic translation initiation factor 4B	1975	113189738
TMX1	Thioredoxin related transmembrane protein 1	81542	113184360
RAB6A	RAB6A, member RAS oncogene family	5870	113197005
CLNS1A	Chloride nucleotide-sensitive channel 1A	1207	113181677
NXT2	Nuclear transport factor 2 like export factor 2	55916	113188478
ARL6IP1	ADP ribosylation factor like GTPase 6 interacting protein 1	23204	113192342
UQCRC2	Ubiquinol-cytochrome c reductase core protein 2	7385	113185096
ALDOA	Fructose-bisphosphate A	226	113176455
Rpl14	Ribosomal protein 14	9045	113191768
RBMS1	RNA binding motif single stranded interacting protein 1 (RBMS1	5937	113185839
HAUS2	AUS augmin like complex subunit 2	55142	113185198
WDR48	WD repeat domain 48	57599	113191764
CDC42	Cell division cycle 42	56882	113193460
RLF	Rearranged L-myc fusion	6018	113186083
HPDL	4-hydroxyphenylpyruvate dioxygenase like	84842	113189143
MMP15	Matrix metallopeptidase 15 (MMP15)	4324	113187728
NFACTC3	Nuclear factor of activated T cells 3	4775	113193728
NIP7	Nucleolar pre-rRNA processing protein	51388	113193721
TERF2	Telomeric repeat binding factor 2	7014	113193753
PHF3	PHD finger protein 3 (PHF3)	23469	113188497
SRSF3	Serine and arginine rich splicing factor 3	25844	113179146
ANAPC4	Anaphase promoting complex subunit 4	29945	113193373
STX18	Syntaxin 18	53407	113192766
TACC3	Transforming acidic coiled-coil containing protein 3	10460	113175998
TAX1BP1	Tax1 binding protein 1	8887	113195821
LAMP2	Lysosomal associated membrane protein 2	3920	113175283
SEPT6	Septin 6	23157	113196961
TAF9	TATA-box binding protein associated factor 9	6880	113184226
OCIAD2	OCIA domain containing 2	132299	113181298
MPHOSPH10	M-phase phosphoprotein 10	10199	113195440
SNX5	Sorting nexin 5	27131	113191060
PRDX3	Peroxiredoxin 3	10935	113179559
OAT	Ornithine aminotransferase	4942	113179616
ECHS1	Enoyl-CoA hydratase	1892	113176858
NEK6	NIMA related kinase 6	10783	113181057
SWI5	SWI5 homologous recombination repair protein	119392	113191404
GLE1	RNA export mediator	2733	113181119
ZNF410	Zinc finger protein 410	57862	113191440
ZC3H14	Zinc finger CCCH-type containing 14	79882	113191025
TMEM242	Transmembrane protein 242	729515	113186383
WTAP	WT1 associated protein	9589	None1
FGFR1OP	FGFR1 oncogene partner	11116	113175276
VMP1	Vacuole membrane protein 1	81671	113189284
AKAP1	A-kinase anchoring protein 1	8165	113195689
UTP18	UTP18, small subunit processome component	51096	113181276
CACOCO2	Calcium binding and coiled-coil domain 2	10241	113181393
CBX1	Chromobox 1	10951	113181359
ERLEC1	Endoplasmic reticulum lectin 1	27248	113190541
SPRED2	Sprouty related EVH1 domain containing 2	200734	113181629
CCT7	Chaperonin containing TCP1 subunit 7	10574	113198881
GCAT	Glycine C-acetyltransferase	23464	113198646
ZNF512	Zinc finger protein 512	57473	113200139
PREB	Prolactin regulatory element binding	10113	113191677
RAB10	RAB10, member RAS oncogene family	10890	113184391
DDX1	DEAD-box helicase 1 (DDX1), mRNA	1653	113187008
CFL2	Cofilin 2	1073	113200307
KTN1	Kinectin 1	3895	113179456
PLEKHG3	Pleckstrin homology and RhoGEF domain containing G3	26030	113180247
MRPL15	Mitochondrial ribosomal protein L1	29088	113186831
RAB2A	RAB2A, member RAS oncogene family	5862	113184191
CLPB	ClpB homolog, mitochondrial AAA ATPase chaperonin	81570	113191303
PPME1	Protein phosphatase methylesterase 1	51400	113175255
MORF4L2	Mortality factor 4 like 2	9643	113192690
HSF2B	Heat shock transcription factor 2 binding protein	11077	113197643
USP16	Ubiquitin specific peptidase 16	10600	113188018
MARF8	Meiosis regulator and mRNA stability factor 1	9665	113197064
IPO8	Importin 8	10526	113201481
VAMP7	Vesicle associated membrane protein 7	6845	113201368
SPARCL1	SPARC like 1	8404	113175370
PES1	Pescadillo ribosomal biogenesis factor 1	23481	113196821
UBE2G1	Ubiquitin conjugating enzyme E2 G1	7326	113186447
NRBP1	Nuclear receptor binding protein 1	29959	113188215
MRPS6	Mitochondrial ribosomal protein S6	64968	113186173

## Sheet: Rotenone only
Transcripts present in Rotenone treated cells
Gene Symbol	Gene Name	Human Gene ID	AGS Gene ID
KIFC2	kinesin family member C2	90990	113197468
ATPIF1	ATPase inhibitory factor 1	93974	113184806
RPS10	Ribosomal protein 10	6204	179038
MAEA	Erythroblast attacher	10296	113175212
POLD2	DNA polymerase delta 2	5425	113190264
HMGCS1	3-hydroxy-3-methylglutaryl-CoA synthase 1	3157	113186212
ISCA2	Iron-sulfur cluster assembly 2	122961	113191913
BUB3	BUB3 mitotic checkpoint protein	9184	113179573
TCF4	Transcription factor 4	6934	113182969
PRSS23	Serine protease 23	11098	113191699
CORO1A	Coronin 1A	11151	113176460
GORASP2	Golgi reassembly stacking protein 2	26003	113183286
ATP5G3	ATP synthase membrane subunit c locus 3	518	113194545
TAF4	TATA-box binding protein associated factor 4	6874	113196112
DAB2	DAB adaptor protein 2	153090	113197854
IFT52	Intraflagellar transport 52	51098	113178978
TMEM199	Transmembrane protein 199	147007	113182796
NSRP1	Nuclear speckle splicing regulatory protein 1	84081	113182876
PGK1	Phosphoglycerate kinase 1	5230	113197820
NDUFB5	NADH:ubiquinone oxidoreductase subunit B5	4711	113178710
DNAJB2	DnaJ heat shock protein family (Hsp40) member B2	3300	113183895
CHRM1	Cholinergic receptor muscarinic 1	1128	113195911
ASNS	Asparagine synthetase	440	113184707
RPL36	Ribosomal protein L36	25873	113193659
RAB11B	RAB11B, member RAS oncogene family	9230	113198923
MRPL58	Mitochondrial ribosomal protein L58	3396	113194000
NUP85	Nucleoporin 85	79902	113193926
RPL26	Ribosomal protein L26	6154	113184050
GSTP1	Glutathione S-transferase pi 1	2950	113188244
CLEC2D	C-type lectin domain family 2 member D	29121	113198235
Arvcf	Armadillo repeat gene deleted in velocardiofacial syndrome	421	113191796
PARK7	Parkinsonism associated deglycase	11315	113180847
ENO1	Enolase 1	2023	113189232
TRAPPC2L	Trafficking protein particle complex 2 like	51693	113191936
RPS16	Ribosomal protein S16	6217	113198712
LIG1	DNA ligase 1	26018	113189178
DYNLL1	Dynein light chain LC8-type 1	8655	113193062
RPL6	Ribosomal protein L6	6128	113199193
TUBB4B	Tubulin beta 4B class IVb	10383	113187559
L7A	Ribosomal protein L7a	6130	113187561
PSMC6	Proteasome 26S subunit, ATPase 6	5706	113198353
MRPL52	Mitochondrial ribosomal protein L52	122704	113194822
TTC7B	Tetratricopeptide repeat domain 7B	145567	113186695
SUMO3	Small ubiquitin like modifier 3	6612	113177251
RPL34	Ribosomal protein L34	6164	113192922
TPP1	Tripeptidyl peptidase 1	1200	113200832
CBR3	Carbonyl Reductase 3	874	113175984
RPS9	Ribosomal protein 9	6203	113176668
USP3	Ubiquitin specific peptidase 3	9960	113180002
AGO3	Argonaute RISC catalytic component 3	192669	113186052
Oscp1	Organic solute carrier partner 1	127700	113186076
ATP6V0B	ATPase H+ transporting V0 subunit b	533	113189161
AKR1A1	Aldo-keto reductase family 1 member A1	10327	113189148
NSUN4	NOP2/Sun RNA methyltransferase 4	387338	113189089
CMTM3	CKLF like MARVEL transmembrane domain containing 3	123920	113185465
TIPRL	TOR signaling pathway regulator	261726	113194231
IDH3B	Isocitrate dehydrogenase 3 (NAD(+)) beta	3420	113197404
COQ6	Coenzyme Q6, monooxygenase	51004	113191518
CDK5RAP3	CDK5 regulatory subunit associated protein 3	80279	113181307
YPEL5	Yippee like 5	51646	113186584
EIF3L	Eukaryotic translation initiation factor 3 subunit L	51386	113198636
PFDN5	Prefoldin subunit 5	5204	113189771
AAAS	Aladin WD repeat nucleoporin	8086	113189769
SLC4A2	Solute carrier family 4 member 2	6275	113199837
S100A4	S100 calcium binding protein A4	6275	113199837
Rps29	Ribosomal protein S29	6235	113184382
UBA52	Ubiquitin A-52 residue ribosomal protein fusion product 1	7311	113183616
NDUFV1	NADH:ubiquinone oxidoreductase core subunit V1	4723	113188296
NACA	Nascent polypeptide associated complex subunit alpha	4666	113189558
DCTN2	Dynactin subunit 2	10540	113189490
C19orf53	Chromosome 19 open reading frame 53	28974	113190416
EMP3	Epithelial membrane protein 3	2014	113194994
NOP10	NOP10 ribonucleoprotein	55505	113185534
LAMTOR5	Late endosomal/lysosomal adaptor, MAPK and MTOR activator 5	10542	113192661
PHB2	Prohibitin 2	11331	113192933
DDHD2	DDHD domain containing 2	23259	113193877
COX5B	Cytochrome c oxidase subunit 5B	1329	113200603
COA5	Cytochrome c oxidase assembly factor 5	493753	113175113
Hsp90aa1	Heat shock protein 90, alpha (cytosolic), class A member 1	3320	113200369
PTP4A1	Protein tyrosine phosphatase 4A1	7803	113188504
Klf6	Kruppel-like factor 6	1316	113199669
MTIF2	Mitochondrial translational initiation factor 2	4528	113190548
CYB561D2	Cytochrome b561 family member D2	56368	113179406
PPP2R5A	Protein phosphatase 2 regulatory subunit B'alpha	5525	113181775
TRA2B	Transformer 2 beta homolog	6434	113183108
MRPS21	Mitochondrial ribosomal protein S21	54460	113200641
GPX4	Glutathione peroxidase 4	2879	113200502
MRPS25	Mitochondrial ribosomal protein S25	64432	113178821
RPL41	Ribosomal protein L41	6171	113201451
PPP2CA	Protein phosphatase 2 catalytic subunit alpha	5515	113190702
SLC44A2	Solute carrier family 44 member 2	57153	113190388
RPL31	Ribosomal protein L31	6160	113175268
SPSB2	SPRY containing SOCS box protein	84727	113192979
PSME2	Proteasome activator subunit 2	5721	113194806
ARPC1B	Actin related protein 2/3 complex subunit 1B	10095	113193569
SLC6A8	Solute carrier family 6 member 8	6535	113199765
NDUFS2	NADH:ubiquinone oxidoreductase core subunit S2	4720	113176166

## Sheet: All three
Transcripts present in hypoxia, hypothermia, and rotenone screens
Gene Symbol	Gene Name	Human Gene ID	AGS Gene ID
ATP5G1 (ATP5MC1)	ATP synthase membrane subunit c locus 1	516	113181397
MANF	Mesencephalic astrocyte derived neurotrophic factor	7873	113179380
CALM1	Calmodulin-1	801	113186692

## Sheet: Hypoxia and Hypothermia
Transcripts present in hypoxia and hypothermia screens
Gene Symbol	Gene Name	Human Gene ID	AGS Gene ID
SLIRP	SRA stem-loop interacting RNA binding protein	81892	113191740
SLC35B2	Solute carrier family 35 member B2	347734	113186858
CAD	Carbamoyl-phosphate synthetase 2	790	113175384
SNAI2	Snail family transcriptional repressor 2	6591	113187423
PIK3CA	Phosphatidylinositol-4,5-bisphosphate 3-kinase catalytic subunit alpha	5290	113178559
LDHB	Lactate dehydrogenase B	3945	113184999
MAP1A	Microtubule associated protein 1A	4130	113185934
FBXO32	F-box protein 32	114907	113195766
EHMT2	Euchromatic histone lysine methyltransferase 1	10919	113201569

## Sheet: Hypoxia and Rotenone
Transcripts present in hypoxia and rotenone screens
Gene Symbol	Gene Name	Human Gene ID	AGS Gene ID
SERF2	Small EDRK-rich factor 2	10169	113183619
ANXA2	Annexin A2	302	113180008
RPS21	Ribosomal protein S21	6227	113196125
RPL4	Ribosomal protein L4	6124	113196735
RPL24	Ribosomal protein L24	6152	113193160

## Sheet: Hypothermia and Rotenone
Transcripts present in hypothermia and rotenone screens
Gene Symbol	Gene Name	Human Gene ID	AGS Gene ID
FIP1L1	Factor interacting with PAPOLA and CPSF1	81608	113180456
LUC7L3	LUC7 like 3 pre-mRNA splicing factor	51747	113181419
ALDOA	Aldolase, fructose-bisphosphate A	226	113176455
YIPF3	Yip1 domain family member 3	25844	113179146
MT2A	Metallothionein 2A	4502	113187712
