# Supplementary material for: Cytoprotection by a naturally occurring variant of ATP5G1 in Arctic ground squirrel neural progenitor cells
Source: eLife. 2020 Oct 14;9:e55578. doi: 10.7554/eLife.55578 (PMC7671683; doi:10.7554/eLife.55578)
Supplement: Supplementary file 2. [file elife-55578-supp2.xlsx]

## Sheet: Supplemental data file 2
	Gene	MSA Position	Test Species Position	Test Variant	Test Variant Instances	AGS Variant	AGS 13LGS Consensus	Outgroup Variant	Outgroup Variant Instances	Aligned Sequences	Gap Fraction	JSD	JSD Z-Score	Test vs Outgroup Blosum62	Outgroup Pairwise Blosum62
0	AAAS	18	18	Q	1	Q	TRUE	L	10	11	0	0.77317	-0.00177	-2	4
1	AAAS	30	30	D	1	D	TRUE	S	10	11	0	0.8366	0.3336	0	4
2	AAAS	58	44	D	1	D	TRUE	N	10	11	0	0.8762	0.543	1	6
3	AAAS	61	47	I	1	I	TRUE	V	10	11	0	0.81043	0.19522	3	4
4	AAAS	64	50	P	1	P	TRUE	L	10	11	0	0.77317	-0.00177	-3	4
5	AAAS	65	51	N	1	N	TRUE	T	10	11	0	0.84502	0.37815	0	5
6	AAAS	68	54	L	1	L	TRUE	P	10	11	0	0.87156	0.5185	-3	7
7	AAAS	77	63	Q	1	Q	TRUE	H	10	11	0	0.91606	0.75376	0	8
8	AAAS	78	64	S	1	S	TRUE	G	10	11	0	0.78953	0.08475	0	6
9	AAAS	193	171	Q	1	Q	TRUE	L	10	11	0	0.77317	-0.00177	-2	4
10	AAAS	196	174	T	1	T	TRUE	S	10	11	0	0.8366	0.3336	1	4
11	AAAS	207	185	I	1	I	TRUE	V	10	11	0	0.81043	0.19522	3	4
12	AAAS	296	274	I	1	I	TRUE	V	10	11	0	0.81043	0.19522	3	4
13	AAAS	300	278	I	1	I	TRUE	T	10	11	0	0.84502	0.37815	-1	5
14	AAAS	540	501	S	1	S	TRUE	A	8	11	0	0.7167	-0.30035	1	2.6
15	AAAS	549	510	-	1	-	TRUE	G	9	11	0.09091	0.72708	-0.24551		4.4
16	AAAS	575	535	T	1	T	TRUE	P	7	11	0	0.76508	-0.04454	-0.4	3.06667
17	AAAS	576	536	L	1	L	TRUE	A	7	11	0	0.63379	-0.73876	-0.6	1.95556
0	ACADM	21	15	I	1	I	TRUE	-	9	10	0.9	0.03283	-3.39776
1	ACADM	35	29	H	1	H	TRUE	A	4	10	0	0.5142	-1.09904	-1.44444	0.08333
2	ACADM	36	30	Q	1	Q	TRUE	P	3	10	0	0.54184	-0.96707	-0.77778	-0.91667
95	ACADM	363	248	A	1	A	TRUE	S	9	10	0	0.8366	0.44051	1	4
96	ACADM	459	344	V	1	V	TRUE	I	9	10	0	0.8304	0.41091	3	4
97	ACADM	460	345	S	1	S	TRUE	G	5	10	0	0.6225	-0.5819	0	1.27778
0	ADCK5	23	9	P	1	P	TRUE	H	6	8	0	0.83681	0.44704	-2	5.71429
1	ADCK5	26	12	L	1	L	TRUE	S	7	8	0	0.8366	0.44561	-2	4
2	ADCK5	30	16	R	1	R	TRUE	Q	5	8	0	0.83849	0.45829	0.71429	2.7619
3	ADCK5	33	19	R	1	R	TRUE	Q	4	8	0	0.63103	-0.93418	0	0.90476
4	ADCK5	59	44	S	1	S	TRUE	T	3	8	0	0.69601	-0.49804	0.14286	0.80952
5	ADCK5	79	64	I	1	I	TRUE	A	4	8	0	0.67997	-0.60568	0.71429	1.71429
6	ADCK5	99	84	F	1	F	TRUE	I	4	8	0	0.69506	-0.50442	-0.14286	2.42857
7	ADCK5	107	92	G	1	G	TRUE	K	4	8	0	0.74738	-0.1532	-2	3.28571
8	ADCK5	111	96	Y	1	Y	TRUE	Q	4	8	0	0.69754	-0.48777	0.14286	0.19048
9	ADCK5	194	179	L	1	L	TRUE	F	7	8	0	0.86927	0.66494	0	6
10	ADCK5	210	195	L	1	L	TRUE	H	4	8	0	0.74164	-0.19173	-2.71429	2.38095
11	ADCK5	212	197	I	1	I	TRUE	L	7	8	0	0.77317	0.01989	2	4
12	ADCK5	221	206	V	1	V	TRUE	I	5	8	0	0.78402	0.09271	2.42857	2.61905
13	ADCK5	269	250	Q	1	Q	TRUE	R	6	8	0	0.80792	0.2531	0.85714	3.57143
14	ADCK5	272	253	G	1	G	TRUE	E	7	8	0	0.8366	0.44561	-2	5
15	ADCK5	279	260	S	1	S	TRUE	G	7	8	0	0.78953	0.12972	0	6
16	ADCK5	302	283	H	1	H	TRUE	R	7	8	0	0.85365	0.56006	0	5
17	ADCK5	309	290	E	1	E	TRUE	R	5	8	0	0.78767	0.1172	0.57143	3.09524
18	ADCK5	318	299	T	1	T	TRUE	V	7	8	0	0.81043	0.26995	0	4
19	ADCK5	349	330	E	1	E	TRUE	K	3	8	0	0.69457	-0.50767	1	2.2381
20	ADCK5	356	337	R	1	R	TRUE	Q	5	8	0	0.74592	-0.16302	0.57143	2.04762
21	ADCK5	365	346	V	1	V	TRUE	A	5	8	0	0.7086	-0.41356	0	2.14286
22	ADCK5	389	370	R	1	R	TRUE	K	7	8	0	0.8429	0.48791	2	5
23	ADCK5	391	372	L	1	L	TRUE	P	7	8	0	0.87156	0.68032	-3	7
24	ADCK5	422	403	T	1	T	TRUE	A	7	8	0	0.7989	0.19259	0	4
25	ADCK5	441	422	K	1	K	TRUE	Q	7	8	0	0.89297	0.824	1	5
26	ADCK5	462	443	H	1	H	TRUE	G	5	8	0	0.70538	-0.43511	-1.42857	2.14286
27	ADCK5	466	447	P	1	P	TRUE	L	5	8	0	0.67701	-0.62557	-3	3.04762
29	ADCK5	471	452	V	1	V	TRUE	A	7	8	0	0.7989	0.19259	0	4
30	ADCK5	476	457	E	1	E	TRUE	D	6	8	0	0.75172	-0.12411	1.57143	3.71429
32	ADCK5	487	468	Q	1	Q	TRUE	A	4	8	0	0.60856	-1.08504	-0.28571	0.80952
33	ADCK5	541	521	L	1	L	TRUE	Q	5	8	0	0.79825	0.18823	-2	3.09524
34	ADCK5	547	527	G	1	G	TRUE	S	5	8	0	0.74732	-0.1536	-0.57143	1.66667
35	ADCK5	552	532	M	1	M	TRUE	I	3	8	0	0.60071	-1.1377	0.42857	1.52381
36	ADCK5	555	535	A	1	A	TRUE	I	3	8	0	0.55059	-1.47411	-0.85714	1.90476
1	AGBL1	233	154	N	1	N	TRUE	S	8	9	0	0.8366	0.58733	1	4
2	AGBL1	237	158	V	1	V	TRUE	A	6	9	0	0.71083	-0.09595	0	2.32143
3	AGBL1	252	173	Q	1	Q	TRUE	R	5	9	0	0.75054	0.11977	1	3.39286
4	AGBL1	257	178	F	1	F	TRUE	L	7	9	0	0.69025	-0.20777	0	3.5
5	AGBL1	285	206	G	1	G	TRUE	S	5	9	0	0.68583	-0.23179	-0.5	1.42857
6	AGBL1	311	232	P	1	P	TRUE	A	7	9	0	0.72933	0.00453	-1	3
8	AGBL1	318	239	S	1	S	TRUE	P	8	9	0	0.87156	0.77731	-1	7
10	AGBL1	323	244	F	1	F	TRUE	I	3	9	0	0.62583	-0.55777	-0.875	1.78571
12	AGBL1	357	278	Y	1	Y	TRUE	D	8	9	0	0.85147	0.66815	-3	6
13	AGBL1	401	322	F	1	F	TRUE	C	2	9	0	0.52871	-1.08545	-2	-0.67857
14	AGBL1	405	326	A	1	A	TRUE	L	8	9	0	0.77317	0.24274	-1	4
15	AGBL1	412	333	N	1	N	TRUE	Y	5	9	0	0.79426	0.35729	-1.375	2.92857
16	AGBL1	430	351	K	1	K	TRUE	N	5	9	0	0.67168	-0.30866	-0.25	2.64286
17	AGBL1	434	355	T	1	T	TRUE	S	3	9	0	0.40676	-1.748	-0.25	-0.85714
18	AGBL1	462	379	-	1	-	TRUE	G	3	9	0.11111	0.53519	-1.05021		0.95238
19	AGBL1	468	384	I	1	I	TRUE	G	5	9	0	0.66514	-0.34422	-2.875	2.57143
20	AGBL1	469	385	K	1	K	TRUE	M	3	9	0	0.69514	-0.18122	-1.25	1.10714
21	AGBL1	471	387	I	1	I	TRUE	P	3	9	0	0.55188	-0.95952	-0.125	-0.28571
22	AGBL1	473	389	H	1	H	TRUE	Q	6	9	0	0.75306	0.13349	-0.25	2.60714
23	AGBL1	485	401	L	1	L	TRUE	S	7	9	0	0.76886	0.21932	-2.125	2.75
25	AGBL1	519	435	S	1	S	TRUE	T	7	9	0	0.74447	0.08682	1	3.75
27	AGBL1	525	441	G	1	G	TRUE	A	3	9	0	0.51307	-1.1704	-1.75	0.03571
28	AGBL1	534	450	L	1	L	TRUE	T	6	9	0	0.68617	-0.22992	-1.25	2.67857
29	AGBL1	563	479	V	1	V	TRUE	M	7	9	0	0.80413	0.41091	1	4.25
30	AGBL1	599	515	F	1	F	TRUE	L	8	9	0	0.77317	0.24274	0	4
31	AGBL1	610	526	I	1	I	TRUE	V	8	9	0	0.81043	0.44514	3	4
32	AGBL1	625	541	S	1	S	TRUE	D	4	9	0	0.77191	0.23588	0.5	3.14286
33	AGBL1	660	576	C	1	C	TRUE	T	4	9	0	0.64984	-0.42733	-0.875	2.03571
34	AGBL1	676	592	N	1	N	TRUE	A	8	9	0	0.7989	0.38253	-2	4
35	AGBL1	719	635	N	1	N	TRUE	S	3	9	0	0.73051	0.01098	-0.125	1.03571
36	AGBL1	738	654	T	1	T	TRUE	A	8	9	0	0.7989	0.38253	0	4
37	AGBL1	749	665	V	1	V	TRUE	A	6	9	0	0.64653	-0.44531	-0.25	2.39286
38	AGBL1	816	732	S	1	S	TRUE	N	6	9	0	0.72684	-0.00896	0.75	3.39286
39	AGBL1	949	865	V	1	V	TRUE	I	6	9	0	0.78418	0.30252	2.5	2.75
40	AGBL1	961	877	S	1	S	TRUE	G	8	9	0	0.78953	0.33164	0	6
41	AGBL1	962	878	A	1	A	TRUE	T	6	9	0	0.67274	-0.30293	-0.125	1.96429
0	AK2	14	12	C	1	C	TRUE	S	3	10	0	0.57386	-3.26993	-1.88889	-0.30556
1	AK2	131	129	R	1	R	TRUE	S	9	10	0	0.8366	0.24571	-1	4
2	AK2	149	147	R	1	R	TRUE	K	5	10	0	0.56277	-3.41822	0.66667	0.72222
3	AK2	163	161	Q	1	Q	TRUE	E	9	10	0	0.8366	0.24571	2	5
4	AK2	194	192	S	1	S	TRUE	T	9	10	0	0.84502	0.35846	1	5
5	AK2	213	211	N	1	N	TRUE	D	9	10	0	0.85147	0.44476	1	6
0	AKAP1	4	4	H	1	H	TRUE	Q	10	11	0	0.89296	0.96128	0	5
1	AKAP1	40	39	K	1	K	TRUE	Q	7	11	0	0.70884	0.24809	0.4	1.91111
2	AKAP1	42	41	D	1	D	TRUE	E	8	11	0	0.66961	0.09615	1.2	2.33333
3	AKAP1	45	44	S	1	S	TRUE	A	6	11	0.18182	0.53212	-0.43639	0.875	1.89286
4	AKAP1	47	46	V	1	V	TRUE	E	3	11	0.18182	0.46051	-0.71377	-1.625	0.57143
5	AKAP1	53	52	D	1	D	TRUE	A	8	11	0	0.71142	0.25808	-1.2	2.24444
6	AKAP1	56	55	K	1	K	TRUE	E	8	11	0	0.75526	0.42791	0.6	3.95556
7	AKAP1	57	56	S	1	S	TRUE	P	5	11	0	0.54397	-0.39049	-0.7	0.55556
8	AKAP1	60	59	I	1	I	TRUE	G	2	11	0	0.39663	-0.96116	-0.7	-0.71111
9	AKAP1	61	60	Q	1	Q	TRUE	E	9	11	0	0.74544	0.38985	1.6	3.6
10	AKAP1	67	66	I	1	I	TRUE	V	8	11	0	0.63996	-0.01869	2.5	2.64444
13	AKAP1	78	77	L	1	L	TRUE	P	10	11	0	0.87156	0.87837	-3	7
14	AKAP1	96	94	S	1	S	TRUE	L	10	11	0	0.77316	0.49726	-2	4
15	AKAP1	111	109	C	1	C	TRUE	S	6	11	0	0.67649	0.12281	-1.4	1.02222
16	AKAP1	129	127	T	1	T	TRUE	S	4	11	0.18182	0.43583	-0.80937	-0.125	0.53571
17	AKAP1	141	139	T	1	T	TRUE	A	10	11	0	0.79889	0.59692	0	4
18	AKAP1	142	140	R	1	R	TRUE	K	10	11	0	0.84289	0.76733	2	5
19	AKAP1	157	155	V	1	V	TRUE	P	4	11	0	0.5961	-0.18858	-1.1	-0.17778
20	AKAP1	163	161	I	1	I	TRUE	V	6	11	0	0.68245	0.1459	1.4	1.86667
21	AKAP1	170	168	V	1	V	TRUE	S	8	11	0	0.7195	0.2894	-1.6	2.93333
22	AKAP1	186	184	C	1	C	TRUE	A	8	11	0	0.69808	0.20643	-0.2	2.57778
23	AKAP1	187	185	A	1	A	TRUE	P	6	11	0	0.71697	0.27961	-0.4	2.06667
25	AKAP1	201	199	R	1	R	TRUE	G	9	11	0	0.70344	0.22721	-1.9	4.8
26	AKAP1	210	208	M	1	M	TRUE	V	9	11	0	0.72346	0.30474	0.8	3.2
28	AKAP1	235	233	L	1	L	TRUE	P	8	11	0	0.78204	0.53165	-2.8	3.75556
29	AKAP1	249	247	G	1	G	TRUE	S	7	11	0.18182	0.59991	-0.17382	-0.25	2.75
30	AKAP1	254	250	F	1	F	TRUE	V	6	11	0.27273	0.46039	-0.71422	-1.14286	2.85714
31	AKAP1	255	251	S	1	S	TRUE	-	4	11	0.36364	0.29572	-1.35203	-1.16667	-0.06667
32	AKAP1	256	252	P	1	P	TRUE	-	4	11	0.36364	0.3526	-1.13174	-1.66667	-0.13333
33	AKAP1	260	254	R	1	R	TRUE	-	4	11	0.36364	0.36678	-1.07679	0.66667	1.06667
34	AKAP1	263	257	S	1	S	TRUE	Y	4	11	0.18182	0.52493	-0.46424	-1.25	0.10714
35	AKAP1	272	266	S	1	S	TRUE	F	7	11	0.18182	0.59322	-0.19974	-1.75	3.75
36	AKAP1	273	267	G	1	G	TRUE	V	4	11	0.27273	0.42242	-0.86129	-3.14286	1.80952
37	AKAP1	274	268	K	1	K	TRUE	E	8	11	0	0.67555	0.11918	0.5	3.08889
38	AKAP1	275	269	L	1	L	TRUE	S	5	11	0	0.59212	-0.20397	-2.1	0.44444
39	AKAP1	287	281	Q	1	Q	TRUE	P	5	11	0	0.63487	-0.03841	-1.4	0.55556
40	AKAP1	290	284	E	1	E	TRUE	R	4	11	0	0.71319	0.26497	0.3	1
41	AKAP1	294	288	D	1	D	TRUE	G	6	11	0	0.56003	-0.32829	-0.9	1.91111
42	AKAP1	296	289	S	1	S	TRUE	R	5	11	0.09091	0.63333	-0.04435	-0.44444	2.63889
43	AKAP1	302	295	M	1	M	TRUE	F	3	11	0	0.53201	-0.43679	0.8	0.73333
44	AKAP1	305	297	A	1	A	TRUE	G	6	11	0	0.65824	0.05212	-0.4	1.24444
45	AKAP1	310	302	K	1	K	TRUE	E	8	11	0	0.75526	0.42791	0.6	3.95556
46	AKAP1	346	310	R	1	R	TRUE	K	5	11	0	0.60871	-0.13975	1.1	1.75556
48	AKAP1	371	335	G	1	G	TRUE	V	6	11	0	0.77001	0.48502	-3	2.53333
49	AKAP1	372	336	D	1	D	TRUE	G	10	11	0	0.78953	0.56064	-1	6
50	AKAP1	374	338	M	1	M	TRUE	I	6	11	0	0.64544	0.00254	0.6	2.06667
51	AKAP1	385	349	P	1	P	TRUE	Q	10	11	0	0.89296	0.96128	-1	5
52	AKAP1	386	350	T	1	T	TRUE	L	5	11	0	0.67191	0.10506	-1	0.11111
53	AKAP1	387	351	V	1	V	TRUE	Q	8	11	0	0.76178	0.45317	-2	3.08889
54	AKAP1	390	354	A	1	A	TRUE	K	6	11	0	0.73432	0.3468	-1	2.86667
55	AKAP1	395	357	S	1	S	TRUE	C	9	11	0.09091	0.81549	0.66121	-1	9
56	AKAP1	410	372	Q	1	Q	TRUE	E	7	11	0	0.66841	0.09149	1.3	2.84444
57	AKAP1	411	373	A	1	A	TRUE	P	10	11	0	0.87156	0.87837	-1	7
58	AKAP1	413	375	P	1	P	TRUE	L	5	11	0.27273	0.47098	-0.67322	-2.42857	1.14286
59	AKAP1	415	377	V	1	V	TRUE	A	2	11	0.09091	0.40448	-0.93078	-1.33333	-0.16667
61	AKAP1	423	385	V	1	V	TRUE	S	4	11	0.09091	0.45633	-0.72993	-2	0.27778
63	AKAP1	436	398	N	1	N	TRUE	D	6	11	0.18182	0.59476	-0.19374	0.75	3
64	AKAP1	439	401	S	1	S	TRUE	P	4	11	0.18182	0.46491	-0.6967	-0.375	0.67857
65	AKAP1	478	439	S	1	S	TRUE	T	6	11	0	0.70977	0.2517	1	2.2
66	AKAP1	484	445	V	1	V	TRUE	L	6	11	0	0.65828	0.05229	-0.2	0.26667
67	AKAP1	491	452	A	1	A	TRUE	V	5	11	0	0.60771	-0.14362	-0.2	-0.53333
69	AKAP1	503	464	-	1	-	TRUE	N	3	11	0.09091	0.52666	-0.45752		0.97778
70	AKAP1	512	470	A	1	A	TRUE	V	8	11	0	0.69074	0.178	0	1.55556
71	AKAP1	577	532	A	1	A	TRUE	M	5	11	0	0.718	0.28358	-0.6	1.68889
0	AKR1A1	4	4	P	1	P	TRUE	S	7	9	0	0.76305	-0.90939	-1	3.25
1	AKR1A1	5	5	F	1	F	TRUE	C	6	9	0	0.81581	-0.04976	-2	4.53571
2	AKR1A1	71	71	L	1	L	TRUE	P	7	9	0	0.77331	-0.74221	-2.75	5
3	AKR1A1	89	89	D	1	D	TRUE	E	7	9	0	0.75805	-0.99088	1.625	4
4	AKR1A1	124	124	L	1	L	TRUE	P	8	9	0	0.87156	0.85872	-3	7
7	AKR1A1	201	201	L	1	L	TRUE	Q	7	9	0	0.84758	0.468	-2.125	3.75
8	AKR1A1	202	202	S	1	S	TRUE	A	8	9	0	0.7989	-0.32521	1	4
9	AKR1A1	233	233	L	1	L	TRUE	V	8	9	0	0.81043	-0.13743	1	4
10	AKR1A1	280	280	A	1	A	TRUE	T	8	9	0	0.84502	0.42626	0	5
12	AKR1A1	290	290	G	1	G	TRUE	D	5	9	0	0.77187	-0.76572	-0.625	3.32143
13	AKR1A1	291	291	T	1	T	TRUE	A	8	9	0	0.7989	-0.32521	0	4
14	AKR1A1	317	317	S	1	S	TRUE	P	8	9	0	0.87156	0.85872	-1	7
15	ALDOA	86	84	E	1	E	TRUE	D	6	7	0	0.85147	0.33978	2	6
16	ALDOA	89	87	R	1	R	TRUE	H	6	7	0	0.91605	0.77066	0	8
17	ALDOA	161	159	S	1	S	TRUE	P	6	7	0	0.87156	0.47382	-1	7
18	ALDOA	389	387	M	1	M	TRUE	L	6	7	0	0.77317	-0.18261	2	4
19	ALDOA	391	389	T	1	T	TRUE	A	6	7	0	0.7989	-0.01095	0	4
0	AMDHD2	8	8	T	1	T	TRUE	A	9	10	0	0.7989	0.6706	0	4
1	AMDHD2	61	61	Y	1	Y	TRUE	C	5	10	0	0.806	0.69878	-2	1.66667
2	AMDHD2	83	83	I	1	I	TRUE	A	9	10	0	0.7989	0.6706	-1	4
3	AMDHD2	117	117	I	1	I	TRUE	V	9	10	0	0.81043	0.71633	3	4
4	AMDHD2	149	149	Q	1	Q	TRUE	R	9	10	0	0.85365	0.88783	1	5
5	AMDHD2	166	166	H	1	H	TRUE	D	4	10	0	0.71451	0.33572	0	2.22222
6	AMDHD2	217	217	Q	1	Q	TRUE	R	6	10	0	0.72439	0.37495	0	1.58333
7	AMDHD2	282	282	Y	1	Y	TRUE	H	9	10	0	0.91606	1.13547	2	8
8	AMDHD2	287	287	H	1	H	TRUE	Q	6	10	0	0.79152	0.6413	-0.33333	3
9	AMDHD2	312	312	D	1	D	TRUE	E	9	10	0	0.8366	0.82017	2	5
10	AMDHD2	366	329	C	1	C	TRUE	S	8	10	0	0.75913	0.51278	-1.22222	3.11111
11	AMDHD2	389	352	A	1	A	TRUE	S	8	10	0.1	0.75188	0.48404	1	4
12	AMDHD2	427	390	R	1	R	TRUE	H	7	10	0.2	0.72338	0.37094	0	8
13	AMDHD2	463	409	L	1	L	TRUE	P	4	10	0	0.56257	-0.26716	-2.44444	0
2	ANAPC4	658	657	I	1	I	TRUE	V	7	10	0	0.76617	-0.50868	2.55556	2.86111
3	ANAPC4	768	767	E	1	E	TRUE	K	9	10	0	0.8429	0.26271	1	5
4	ANAPC4	776	775	T	1	T	TRUE	V	8	10	0	0.72451	-0.92747	0	3.11111
5	ANAPC4	780	779	P	1	P	TRUE	S	8	10	0	0.74907	-0.68052	-1	3.33333
6	ANAPC4	782	781	V	1	V	TRUE	A	7	10	0	0.71213	-1.05193	0	2.47222
7	ANAPC4	783	782	G	1	G	TRUE	E	9	10	0	0.8366	0.19936	-2	5
8	ANAPC4	786	785	H	1	H	TRUE	Q	8	10	0	0.8304	0.13711	-0.22222	3.66667
9	ANAPC4	787	786	T	1	T	TRUE	A	7	10	0	0.71574	-1.01562	-0.22222	1.72222
10	ANAPC4	790	789	S	1	S	TRUE	A	9	10	0	0.7989	-0.17959	1	4
0	ANXA2	35	17	Q	1	Q	TRUE	H	10	11	0	0.91606	0.73587	0	8
1	ANXA2	305	287	I	1	I	TRUE	V	10	11	0	0.81043	0.08389	3	4
0	APEX1	23	23	S	1	S	TRUE	A	6	10	0	0.70647	-1.94644	1	2.08333
1	APEX1	28	28	V	1	V	TRUE	A	4	10	0	0.59902	-3.73953	-0.66667	0.91667
2	APEX1	33	33	K	1	K	TRUE	N	6	10	0	0.77384	-0.82236	-0.33333	2.91667
3	APEX1	37	37	T	1	T	TRUE	A	8	10	0	0.72618	-1.61751	0.11111	3.33333
4	APEX1	106	106	P	1	P	TRUE	A	7	10	0	0.69486	-2.14016	-1.22222	2.44444
5	APEX1	164	164	K	1	K	TRUE	A	5	10	0	0.69913	-2.06898	-0.55556	2.33333
6	APEX1	194	194	Q	1	Q	TRUE	K	8	10	0	0.77473	-0.80749	1	4.33333
7	APEX1	261	261	E	1	E	TRUE	A	7	10	0	0.72773	-1.59179	-1	2.13889
86	ARHGAP21	328	211	N	1	N	TRUE	T	4	9	0	0.65235	-0.99538	-1	1.03571
87	ARHGAP21	332	215	I	1	I	TRUE	T	5	9	0	0.63832	-1.09843	-0.5	1.92857
88	ARHGAP21	373	256	Q	1	Q	TRUE	H	8	9	0	0.91606	0.94219	0	8
89	ARHGAP21	453	336	S	1	S	TRUE	A	4	9	0	0.70654	-0.59721	1	1.92857
90	ARHGAP21	470	353	A	1	A	TRUE	V	5	9	0	0.70509	-0.60784	-0.375	3.46429
91	ARHGAP21	601	484	K	1	K	TRUE	Q	8	9	0	0.89297	0.77255	1	5
93	ARHGAP21	622	505	G	1	G	TRUE	C	6	9	0	0.75759	-0.22211	-2.5	4.42857
94	ARHGAP21	624	507	T	1	T	TRUE	M	6	9	0	0.74307	-0.32877	-0.875	3.21429
95	ARHGAP21	674	557	M	1	M	TRUE	L	8	9	0	0.77317	-0.10764	2	4
97	ARHGAP21	688	571	A	1	A	TRUE	T	6	9	0	0.70146	-0.63456	0	2.64286
98	ARHGAP21	702	584	A	1	A	TRUE	P	4	9	0	0.75636	-0.23118	0	1.78571
99	ARHGAP21	703	585	L	1	L	TRUE	P	7	9	0	0.79034	0.01847	-2.875	5
101	ARHGAP21	713	595	G	1	G	TRUE	A	3	9	0	0.56796	-1.61537	-1	0.21429
102	ARHGAP21	714	596	L	1	L	TRUE	P	6	9	0	0.75121	-0.26902	-2.5	3.46429
103	ARHGAP21	716	598	K	1	K	TRUE	L	3	9	0	0.50207	-2.09949	-1.25	0.17857
104	ARHGAP21	719	601	T	1	T	TRUE	N	8	9	0	0.8762	0.64932	0	6
105	ARHGAP21	720	602	V	1	V	TRUE	A	5	9	0	0.59619	-1.40799	0	1.25
106	ARHGAP21	724	606	G	1	G	TRUE	D	8	9	0	0.85147	0.46766	-1	6
107	ARHGAP21	729	611	L	1	L	TRUE	V	5	9	0	0.60164	-1.36793	-0.125	1.03571
108	ARHGAP21	736	618	P	1	P	TRUE	L	5	9	0	0.53864	-1.8308	-2.625	1.57143
109	ARHGAP21	743	625	L	1	L	TRUE	I	6	9	0	0.66744	-0.88445	1.5	2.57143
110	ARHGAP21	746	628	T	1	T	TRUE	S	7	9	0	0.77182	-0.11755	0.75	2.75
111	ARHGAP21	887	735	C	1	C	TRUE	S	7	9	0	0.74207	-0.33613	-0.875	3.25
112	ARHGAP21	1035	883	P	1	P	TRUE	T	7	9	0	0.75255	-0.25916	-1	3.75
113	ARHGAP21	1406	1253	S	1	S	TRUE	T	6	9	0	0.72461	-0.46447	1	2.82143
114	ARHGAP21	1522	1369	S	1	S	TRUE	G	8	9	0	0.78953	0.01258	0	6
115	ARHGAP21	1535	1382	S	1	S	TRUE	T	7	9	0	0.75362	-0.25126	1	3.75
116	ARHGAP21	1537	1384	T	1	T	TRUE	K	8	9	0	0.8429	0.40466	-1	5
117	ARHGAP21	1539	1386	-	1	-	TRUE	S	3	9	0.11111	0.59926	-1.38543		0.21429
118	ARHGAP21	1548	1393	T	1	T	TRUE	-	5	9	0.55556	0.28783	-3.67358	-1	2
119	ARHGAP21	1576	1421	S	1	S	TRUE	C	7	9	0	0.84455	0.41682	-1	6
120	ARHGAP21	1585	1430	S	1	S	TRUE	P	8	9	0	0.87156	0.61528	-1	7
121	ARHGAP21	1631	1476	C	1	C	TRUE	S	7	9	0	0.76143	-0.19392	-1	3.25
122	ARHGAP21	1651	1496	M	1	M	TRUE	T	5	9	0	0.76322	-0.18075	-1.375	2
123	ARHGAP21	1710	1555	V	1	V	TRUE	L	6	9	0.11111	0.63784	-1.10198	0.42857	2
124	ARHGAP21	1780	1625	S	1	S	TRUE	N	6	9	0	0.77946	-0.06142	1	3.39286
125	ARHGAP21	1815	1659	P	1	P	TRUE	Q	8	9	0	0.89297	0.77255	-1	5
128	ARHGAP21	1933	1777	L	1	L	TRUE	P	4	9	0	0.65764	-0.9565	-2	1.25
129	ARHGAP21	1939	1783	S	1	S	TRUE	L	6	9	0	0.69278	-0.69831	-1.75	1.46429
130	ARHGAP21	1943	1787	R	1	R	TRUE	T	5	9	0	0.71689	-0.52117	-1.25	1.5
131	ARHGAP21	1945	1789	E	1	E	TRUE	D	6	9	0	0.75702	-0.22628	1.25	2.96429
132	ARHGAP21	1948	1792	W	1	W	TRUE	L	6	9	0	0.70284	-0.6244	-2.5	1.10714
133	ARHGAP21	1968	1809	T	1	T	TRUE	N	5	9	0	0.70246	-0.6272	0.125	2.82143
134	ARHGAP21	1971	1812	H	1	H	TRUE	L	4	9	0	0.70845	-0.58315	-2.5	0.64286
135	ARHGAP21	1978	1819	L	1	L	TRUE	S	8	9	0	0.8366	0.35836	-2	4
136	ARHGAP21	1986	1827	N	1	N	TRUE	S	8	9	0	0.8366	0.35836	1	4
137	ARHGAP21	1998	1839	T	1	T	TRUE	A	8	9	0	0.7989	0.0814	0	4
0	ARL6IP1	29	29	M	1	M	TRUE	V	9	10	0	0.81043	-0.05027	1	4
1	ARL6IP1	76	76	Y	1	Y	TRUE	F	9	10	0	0.86927	0.46806	3	6
2	ARL6IP1	155	151	I	1	I	TRUE	V	9	10	0	0.81043	-0.05027	3	4
3	ARL6IP1	163	159	F	1	F	TRUE	L	9	10	0	0.77317	-0.37842	0	4
1	ARPC1B	199	199	N	1	N	TRUE	S	6	7	0	0.8366	0.00319	1	4
2	ARPC1B	316	316	G	1	G	TRUE	A	6	7	0	0.7989	-0.70098	0	4
0	ARVCF	43	43	H	1	H	TRUE	R	9	10	0	0.85364	0.55878	0	5
1	ARVCF	52	52	S	1	S	TRUE	G	7	10	0.2	0.62249	-0.45834	0	6
2	ARVCF	59	58	H	1	H	TRUE	Q	9	10	0	0.89297	0.7318	0	5
3	ARVCF	189	187	N	1	N	TRUE	G	7	10	0	0.70226	-0.10733	0.22222	3.61111
4	ARVCF	195	193	L	1	L	TRUE	P	7	10	0.2	0.6851	-0.18286	-3	7
5	ARVCF	212	210	L	1	L	TRUE	V	6	10	0	0.69961	-0.11902	1	2.08333
7	ARVCF	249	245	S	1	S	TRUE	P	8	10	0	0.82983	0.454	-1	5
9	ARVCF	294	290	A	1	A	TRUE	P	9	10	0	0.87156	0.63761	-1	7
10	ARVCF	322	318	Y	1	Y	TRUE	F	9	10	0	0.86927	0.62753	3	6
11	ARVCF	395	391	S	1	S	TRUE	G	8	10	0	0.70325	-0.10298	0.11111	4.66667
13	ARVCF	770	766	Q	1	Q	TRUE	R	6	10	0	0.71259	-0.06191	0.44444	1.80556
46	ARVCF	894	890	A	1	A	TRUE	G	8	10	0	0.71172	-0.06573	0	4
47	ARVCF	899	895	S	1	S	TRUE	P	6	10	0	0.68667	-0.17597	-1.11111	1.75
48	ARVCF	962	949	L	1	L	TRUE	A	4	10	0.1	0.49851	-1.00389	-0.375	0.92857
1	ASAH1	29	9	I	1	I	TRUE	T	6	11	0	0.66005	-0.58787	-1.4	1.55556
2	ASAH1	89	69	E	1	E	TRUE	D	6	11	0	0.65809	-0.59964	1	0.93333
4	ASAH1	127	107	D	1	D	TRUE	G	10	11	0	0.78953	0.19087	-1	6
5	ASAH1	130	110	S	1	S	TRUE	P	10	11	0	0.87156	0.6842	-1	7
7	ASAH1	250	230	M	1	M	TRUE	I	6	11	0	0.55276	-1.23309	0.4	0.64444
10	ASAH1	332	312	N	1	N	TRUE	Q	6	11	0	0.74927	-0.05129	0	1.73333
11	ASAH1	347	327	S	1	S	TRUE	N	8	11	0	0.82473	0.40254	0.6	4.26667
13	ASAH1	373	353	S	1	S	TRUE	A	8	11	0	0.70742	-0.30299	0.8	2.24444
0	ASCC2	199	145	V	1	V	TRUE	A	10	11	0	0.7989	0.22784	0	4
1	ASCC2	228	174	L	1	L	TRUE	P	10	11	0	0.87156	0.60041	-3	7
2	ASCC2	243	189	N	1	N	TRUE	S	10	11	0	0.8366	0.42112	1	4
3	ASCC2	283	229	K	1	K	TRUE	R	10	11	0	0.85365	0.50854	2	5
4	ASCC2	356	302	C	1	C	TRUE	S	9	11	0	0.77756	0.11844	-1.2	3
5	ASCC2	360	306	S	1	S	TRUE	G	9	11	0	0.70704	-0.24313	0.1	4.8
6	ASCC2	397	343	V	1	V	TRUE	I	10	11	0	0.8304	0.38934	3	4
7	ASCC2	466	412	M	1	M	TRUE	T	6	11	0	0.61131	-0.73398	-1	1.62222
8	ASCC2	467	413	N	1	N	TRUE	D	8	11	0	0.70468	-0.25526	0.8	3.15556
9	ASCC2	494	440	T	1	T	TRUE	M	3	11	0	0.57613	-0.91436	-0.6	-0.13333
10	ASCC2	505	450	V	1	V	TRUE	E	10	11	0	0.8366	0.42112	-2	5
11	ASCC2	581	526	N	1	N	TRUE	K	9	11	0	0.77391	0.09972	0	3.8
12	ASCC2	637	580	S	1	S	TRUE	A	10	11	0	0.7989	0.22784	1	4
13	ASCC2	685	625	V	1	V	TRUE	A	10	11	0	0.7989	0.22784	0	4
14	ASCC2	708	648	S	1	S	TRUE	P	10	11	0	0.87156	0.60041	-1	7
0	ASNS	64	64	L	1	L	TRUE	V	9	10	0	0.81043	-0.29289	1	4
1	ASNS	116	116	L	1	L	TRUE	M	9	10	0	0.91875	1.64158	2	5
2	ASNS	172	172	A	1	A	TRUE	T	9	10	0	0.84502	0.32494	0	5
3	ASNS	214	214	V	1	V	TRUE	A	8	10	0	0.72933	-1.74116	0	3.11111
5	ASNS	483	483	Q	1	Q	TRUE	R	5	10	0	0.74812	-1.40551	1	3.33333
6	ASNS	524	524	Q	1	Q	TRUE	R	7	10	0	0.75151	-1.34498	0.77778	2.94444
0	ATP5G1	16	16	-	1	-	TRUE	C	5	11	0.09091	0.7954	-0.02717		2.33333
1	ATP5G1	18	17	S	1	S	TRUE	T	10	11	0	0.84502	0.42488	1	5
2	ATP5G1	33	32	L	1	L	TRUE	P	10	11	0	0.87156	0.66668	-3	7
3	ATP5G1	41	39	T	1	T	TRUE	P	10	11	0	0.87156	0.66668	-1	7
4	ATP5G1	45	43	S	1	S	TRUE	-	10	11	0.90909	0.03283	-6.97424
0	ATP5G3	27	27	V	1	V	TRUE	A	10	11	0	0.7989	-0.22655	0	4
1	ATP5G3	40	39	K	1	K	TRUE	E	10	11	0	0.8366	0.28532	1	5
3	ATP5G3	52	51	E	1	E	TRUE	V	9	11	0	0.77182	-0.59425	-2	3.4
4	ATP5G3	53	52	R	1	R	TRUE	S	8	11	0	0.79087	-0.33559	-1.4	2.33333
0	ATP6V0B	19	19	T	1	T	TRUE	L	3	8	0	0.62564	-0.35593	-0.71429	1.09524
0	ATPIF1	15	15	L	1	L	TRUE	W	9	10	0	0.94756	1.35804	-2	11
3	ATPIF1	52	52	R	1	R	TRUE	Q	7	10	0	0.79725	0.37911	1.22222	3.44444
4	ATPIF1	69	69	I	1	I	TRUE	A	9	10	0	0.7989	0.38988	-1	4
5	ATPIF1	101	101	H	1	H	TRUE	K	2	10	0	0.49572	-1.58461	-0.77778	-0.27778
6	ATPIF1	103	103	H	1	H	TRUE	K	8	10	0	0.78249	0.28297	-0.77778	3.88889
0	ATRX	66	51	A	1	A	TRUE	G	10	11	0	0.78953	0.03987	0	6
1	ATRX	88	73	P	1	P	TRUE	S	10	11	0	0.8366	0.37442	-1	4
2	ATRX	122	106	V	1	V	TRUE	A	10	11	0	0.7989	0.10645	0	4
3	ATRX	321	305	T	1	T	TRUE	S	6	11	0	0.75914	-0.17617	0.6	2.66667
4	ATRX	336	320	T	1	T	TRUE	S	9	11	0	0.77849	-0.03866	0.9	3.4
5	ATRX	359	341	N	1	N	TRUE	S	9	11	0	0.76556	-0.13054	0.9	3.4
6	ATRX	452	434	V	1	V	TRUE	I	7	11	0	0.70206	-0.58195	2.2	1.77778
7	ATRX	466	448	I	1	I	TRUE	P	8	11	0	0.77354	-0.07381	-2.8	4.08889
8	ATRX	488	470	N	1	N	TRUE	S	9	11	0	0.7418	-0.29946	0.9	3.2
9	ATRX	497	479	I	1	I	TRUE	V	5	11	0.09091	0.54836	-1.6746	0.88889	0.94444
10	ATRX	504	486	R	1	R	TRUE	K	10	11	0	0.8429	0.41921	2	5
11	ATRX	555	537	I	1	I	TRUE	V	10	11	0	0.81043	0.18838	3	4
12	ATRX	559	541	T	1	T	TRUE	A	6	11	0	0.62177	-1.15274	0.1	1.6
13	ATRX	561	543	F	1	F	TRUE	Y	8	11	0	0.84272	0.41795	2.2	5.24444
14	ATRX	595	577	S	1	S	TRUE	T	7	11	0.09091	0.65126	-0.94309	0.33333	3.02778
15	ATRX	632	614	P	1	P	TRUE	Y	8	11	0	0.80286	0.13463	-2.8	3.75556
16	ATRX	651	633	T	1	T	TRUE	S	5	11	0	0.69464	-0.63474	0.4	2.22222
17	ATRX	657	639	T	1	T	TRUE	V	6	11	0.09091	0.52885	-1.81326	-0.11111	1.88889
18	ATRX	701	683	V	1	V	TRUE	T	9	11	0.09091	0.75554	-0.20181	0	5
19	ATRX	760	742	S	1	S	TRUE	-	10	11	0.90909	0.03283	-5.33932
20	ATRX	790	771	K	1	K	TRUE	R	5	11	0	0.59035	-1.3761	0.6	0.91111
22	ATRX	860	841	F	1	F	TRUE	V	8	11	0	0.72053	-0.45064	-0.8	3.64444
23	ATRX	863	844	R	1	R	TRUE	K	7	11	0	0.70306	-0.57484	1.2	2.13333
24	ATRX	874	855	N	1	N	TRUE	H	7	11	0	0.77238	-0.08204	0.8	3.68889
25	ATRX	903	884	-	1	-	TRUE	E	9	11	0.09091	0.78476	0.00593		4.4
26	ATRX	907	884	-	1	-	TRUE	R	7	11	0.09091	0.61856	-1.17553		2.13333
27	ATRX	908	884	-	1	-	TRUE	E	7	11	0.09091	0.62386	-1.13786		2.42222
28	ATRX	917	890	S	1	S	TRUE	G	10	11	0	0.78953	0.03987	0	6
29	ATRX	946	917	V	1	V	TRUE	G	7	11	0	0.62644	-1.11953	-2.5	2.93333
31	ATRX	966	937	I	1	I	TRUE	V	9	11	0	0.75381	-0.21406	2.7	3
32	ATRX	967	938	V	1	V	TRUE	A	7	11	0	0.59041	-1.37566	-0.5	1.71111
33	ATRX	1003	974	D	1	D	TRUE	E	10	11	0	0.8366	0.37442	2	5
34	ATRX	1007	978	E	1	E	TRUE	D	8	11	0	0.7298	-0.38474	1.2	3.51111
35	ATRX	1021	991	E	1	E	TRUE	K	9	11	0	0.77276	-0.07935	0.8	3.8
36	ATRX	1031	1001	M	1	M	TRUE	I	5	11	0.18182	0.4996	-2.02121	1.125	3.07143
37	ATRX	1033	1003	I	1	I	TRUE	M	7	11	0	0.74273	-0.29284	0.4	2.15556
38	ATRX	1053	1023	S	1	S	TRUE	I	9	11	0	0.76389	-0.14244	-1.9	2.6
39	ATRX	1060	1030	L	1	L	TRUE	I	8	11	0	0.70786	-0.54076	1.9	3.22222
40	ATRX	1077	1047	M	1	M	TRUE	I	6	11	0	0.65555	-0.91259	0	-0.42222
41	ATRX	1081	1051	I	1	I	TRUE	T	5	11	0	0.63794	-1.03778	-1.3	1.93333
42	ATRX	1095	1065	V	1	V	TRUE	L	8	11	0	0.68897	-0.67501	0.4	1.86667
43	ATRX	1110	1080	I	1	I	TRUE	S	7	11	0	0.68896	-0.67512	-1.9	2.44444
44	ATRX	1122	1092	R	1	R	TRUE	C	4	11	0	0.72804	-0.39726	-2.6	0.84444
45	ATRX	1135	1105	F	1	F	TRUE	C	10	11	0	0.91875	0.95843	-2	9
46	ATRX	1143	1113	C	1	C	TRUE	Y	8	11	0.18182	0.68442	-0.70738	-2	7
47	ATRX	1147	1117	Q	1	Q	TRUE	E	8	11	0	0.71619	-0.48152	1.2	2.53333
48	ATRX	1217	1187	P	1	P	TRUE	S	10	11	0	0.8366	0.37442	-1	4
49	ATRX	1223	1192	N	1	N	TRUE	T	9	11	0	0.78157	-0.01675	-0.2	3.8
50	ATRX	1238	1206	V	1	V	TRUE	I	10	11	0	0.8304	0.33036	3	4
51	ATRX	1306	1249	C	1	C	TRUE	S	10	11	0	0.8366	0.37442	-1	4
52	ATRX	1402	1337	K	1	K	TRUE	R	10	11	0	0.85365	0.49563	2	5
53	ATRX	1422	1357	N	1	N	TRUE	K	10	11	0	0.8429	0.41921	0	5
54	ATRX	1426	1361	N	1	N	TRUE	H	10	11	0	0.91606	0.93928	1	8
55	ATRX	1441	1376	E	1	E	TRUE	D	10	11	0	0.85147	0.48016	2	6
56	ATRX	1444	1379	E	1	E	TRUE	D	10	11	0	0.85147	0.48016	2	6
57	ATRX	1493	1428	I	1	I	TRUE	V	10	11	0	0.81043	0.18838	3	4
58	ATRX	1509	1444	V	1	V	TRUE	K	4	11	0	0.59988	-1.30836	-2.3	1.57778
59	ATRX	2035	1963	M	1	M	TRUE	V	10	11	0	0.81043	0.18838	1	4
60	ATRX	2038	1966	A	1	A	TRUE	T	9	11	0	0.77178	-0.08633	0.1	4.2
61	ATRX	2050	1978	D	1	D	TRUE	E	10	11	0	0.8366	0.37442	2	5
0	ATXN7L1	130	130	S	1	S	TRUE	P	7	8	0	0.87156	0.55871	-1	7
1	ATXN7L1	372	367	G	1	G	TRUE	A	5	8	0	0.63119	-1.04612	-0.42857	2.04762
2	ATXN7L1	374	369	E	1	E	TRUE	D	7	8	0	0.85147	0.42456	2	6
3	ATXN7L1	423	418	A	1	A	TRUE	T	7	8	0	0.84502	0.3815	0	5
4	ATXN7L1	436	431	T	1	T	TRUE	A	7	8	0	0.7989	0.07358	0	4
5	ATXN7L1	449	444	G	1	G	TRUE	A	5	8	0	0.70743	-0.53713	-0.57143	2.14286
6	ATXN7L1	454	449	R	1	R	TRUE	K	7	8	0	0.8429	0.36732	2	5
7	ATXN7L1	462	456	V	1	V	TRUE	T	7	8	0	0.84502	0.3815	0	5
8	ATXN7L1	590	584	T	1	T	TRUE	S	7	8	0	0.8366	0.32525	1	4
9	ATXN7L1	645	639	G	1	G	TRUE	S	7	8	0	0.8366	0.32525	0	4
10	ATXN7L1	779	771	P	1	P	TRUE	Q	7	8	0	0.89297	0.70162	-1	5
11	ATXN7L1	780	772	P	1	P	TRUE	T	5	8	0	0.72221	-0.43843	-1	2.57143
12	ATXN7L1	812	804	T	1	T	TRUE	N	7	8	0	0.8762	0.58964	0	6
13	ATXN7L1	851	843	T	1	T	TRUE	A	4	8	0	0.69911	-0.59269	0.42857	2.28571
14	ATXN7L1	870	862	T	1	T	TRUE	A	4	8	0.375	0.45762	-2.20496	0	4
15	ATXN7L1	901	893	T	1	T	TRUE	S	5	8	0	0.75869	-0.19488	0.42857	1.7619
16	ATXN7L1	931	923	E	1	E	TRUE	D	7	8	0	0.85147	0.42456	2	6
0	BCAS1	16	16	K	1	K	TRUE	N	6	10	0	0.74579	0.24414	-0.22222	3.16667
3	BCAS1	63	62	T	1	T	TRUE	A	8	10	0	0.73742	0.19654	-0.11111	2.88889
4	BCAS1	72	71	M	1	M	TRUE	I	5	10	0	0.6268	-0.43262	0.11111	0.80556
5	BCAS1	121	120	P	1	P	TRUE	S	9	10	0	0.8366	0.76065	-1	4
6	BCAS1	130	129	N	1	N	TRUE	K	7	10	0	0.66758	-0.20067	-0.22222	2.52778
7	BCAS1	140	139	E	1	E	TRUE	S	4	10	0	0.71629	0.07635	-0.33333	0.58333
8	BCAS1	141	140	P	1	P	TRUE	M	3	10	0	0.59397	-0.61934	-2.33333	-0.55556
9	BCAS1	159	158	R	1	R	TRUE	Q	5	10	0	0.79215	0.50786	-0.11111	0.69444
10	BCAS1	170	169	P	1	P	TRUE	T	5	10	0.1	0.64205	-0.34586	-1	2.21429
17	BCAS1	183	173	E	1	E	TRUE	S	5	10	0	0.70462	0.00998	-0.44444	2.33333
18	BCAS1	184	174	S	1	S	TRUE	G	7	10	0	0.73062	0.15788	0	2.86111
19	BCAS1	190	180	-	1	-	TRUE	K	7	10	0.1	0.71485	0.06821		3.52778
20	BCAS1	191	180	-	1	-	TRUE	P	8	10	0.1	0.79149	0.5041		5.22222
21	BCAS1	194	182	T	1	T	TRUE	S	5	10	0	0.57675	-0.71731	0	0.44444
22	BCAS1	211	199	A	1	A	TRUE	P	9	10	0	0.87156	0.95954	-1	7
23	BCAS1	214	202	I	1	I	TRUE	S	5	10	0	0.56858	-0.76375	-1.44444	0.41667
24	BCAS1	234	221	G	1	G	TRUE	L	5	10	0	0.58545	-0.66779	-2.88889	0.83333
25	BCAS1	238	225	G	1	G	TRUE	S	5	10	0	0.67342	-0.16747	-0.66667	1.33333
26	BCAS1	240	227	A	1	A	TRUE	D	6	10	0	0.70956	0.03811	-1.33333	2.5
27	BCAS1	253	240	T	1	T	TRUE	-	4	10	0.4	0.37587	-1.85984	-0.8	3
28	BCAS1	259	246	E	1	E	TRUE	G	3	10	0	0.58294	-0.68209	-0.66667	0.11111
29	BCAS1	283	270	N	1	N	TRUE	D	4	10	0.3	0.50772	-1.10991	0	1.6
30	BCAS1	287	274	S	1	S	TRUE	N	6	10	0.2	0.63053	-0.41142	0.57143	3.42857
34	BCAS1	389	374	R	1	R	TRUE	K	9	10	0	0.8429	0.79649	2	5
35	BCAS1	399	384	A	1	A	TRUE	-	5	10	0.5	0.32704	-2.1376	-1.5	0.5
36	BCAS1	400	385	V	1	V	TRUE	-	4	10	0.4	0.39055	-1.77635	-0.8	0.6
38	BCAS1	405	390	G	1	G	TRUE	P	3	10	0	0.58281	-0.68281	-1.77778	0.41667
39	BCAS1	436	421	E	1	E	TRUE	D	9	10	0	0.85147	0.84525	2	6
40	BCAS1	442	424	A	1	A	TRUE	P	7	10	0	0.76804	0.37072	-0.55556	3.80556
41	BCAS1	443	425	P	1	P	TRUE	T	9	10	0	0.84502	0.80857	-1	5
43	BCAS1	460	442	F	1	F	TRUE	S	6	10	0	0.61602	-0.49392	-1.55556	1.22222
44	BCAS1	462	444	K	1	K	TRUE	E	9	10	0	0.8366	0.76065	1	5
45	BCAS1	464	446	D	1	D	TRUE	E	7	10	0.1	0.65131	-0.2932	1.625	3.25
46	BCAS1	467	449	S	1	S	TRUE	L	9	10	0	0.77317	0.3999	-2	4
47	BCAS1	476	458	E	1	E	TRUE	G	5	10	0.3	0.43	-1.55195	-1.5	3.33333
48	BCAS1	479	461	K	1	K	TRUE	A	4	10	0	0.65707	-0.26046	-0.55556	0.83333
49	BCAS1	491	473	A	1	A	TRUE	E	8	10	0	0.76917	0.37716	-1.11111	4.33333
50	BCAS1	505	487	H	1	H	TRUE	Q	9	10	0	0.89297	1.08128	0	5
51	BCAS1	528	510	H	1	H	TRUE	Q	8	10	0	0.81859	0.65825	0	4.33333
52	BCAS1	531	513	S	1	S	TRUE	D	6	10	0	0.77153	0.39058	0.33333	3.5
53	BCAS1	536	518	P	1	P	TRUE	T	4	10	0	0.6167	-0.49008	-1.22222	1.27778
54	BCAS1	537	519	A	1	A	TRUE	I	4	10	0	0.64392	-0.33527	-0.66667	1.19444
55	BCAS1	547	528	P	1	P	TRUE	-	8	10	0.8	0.07924	-3.54701	-1
56	BCAS1	555	536	S	1	S	TRUE	K	9	10	0	0.8429	0.79649	0	5
57	BCAS1	557	538	A	1	A	TRUE	G	6	10	0	0.64473	-0.33062	-0.11111	1.58333
58	BCAS1	569	544	R	1	R	TRUE	K	9	10	0	0.8429	0.79649	2	5
59	BCAS1	570	545	P	1	P	TRUE	S	5	10	0	0.70362	0.00428	-1	2.33333
60	BCAS1	575	550	T	1	T	TRUE	N	7	10	0	0.77221	0.39444	0.22222	4
61	BCAS1	594	569	V	1	V	TRUE	A	7	10	0	0.72506	0.12625	-0.44444	2.13889
62	BCAS1	605	580	G	1	G	TRUE	D	9	10	0	0.85147	0.84525	-1	6
63	BCAS1	611	586	L	1	L	TRUE	P	7	10	0	0.76804	0.37072	-2.77778	3.80556
64	BCAS1	614	589	P	1	P	TRUE	R	9	10	0	0.85365	0.85763	-2	5
12	BRD4	289	287	A	1	A	TRUE	P	9	10	0	0.87156	0.48013	-1	7
13	BRD4	298	296	N	1	N	TRUE	S	9	10	0	0.8366	0.26372	1	4
14	BRD4	343	341	I	1	I	TRUE	T	9	10	0	0.84502	0.31587	-1	5
15	BRD4	371	369	V	1	V	TRUE	A	7	10	0	0.68047	-0.70251	-0.66667	2.5
16	BRD4	831	814	T	1	T	TRUE	-	9	10	0.9	0.03283	-4.71068
17	BRD4	841	824	V	1	V	TRUE	A	8	10	0	0.72973	-0.39765	0	3.11111
18	BRD4	955	938	P	1	P	TRUE	A	9	10	0	0.7989	0.03043	-1	4
19	BRD4	969	951	S	1	S	TRUE	P	9	10	0	0.87156	0.48013	-1	7
20	BRD4	1086	1063	A	1	A	TRUE	P	9	10	0	0.87156	0.48013	-1	7
21	BRD4	1153	1130	Q	1	Q	TRUE	-	5	10	0.5	0.35442	-2.72039	1	3.5
22	BRD4	1156	1133	S	1	S	TRUE	-	5	10	0.5	0.40615	-2.40028	-1	7
23	BRD4	1159	1136	S	1	S	TRUE	-	5	10	0.5	0.40615	-2.40028	-1	7
24	BRD4	1161	1138	A	1	A	TRUE	-	6	10	0.6	0.27515	-3.21103	-0.66667	1.66667
25	BRD4	1164	1141	D	1	D	TRUE	-	5	10	0.5	0.36791	-2.6369	-1	6
26	BRD4	1165	1142	H	1	H	TRUE	-	5	10	0.5	0.36651	-2.64558	0	2.33333
27	BRD4	1166	1143	S	1	S	TRUE	-	5	10	0.5	0.3235	-2.91178	-0.5	1
28	BRD4	1175	1152	T	1	T	TRUE	-	5	10	0.5	0.37228	-2.60988	0	4
29	BRD4	1176	1153	I	1	I	TRUE	-	5	10	0.5	0.33131	-2.86346	-1	2
30	BRD4	1179	1156	L	1	L	TRUE	-	5	10	0.5	0.36153	-2.6764	1.5	2.16667
31	BRD4	1181	1158	F	1	F	TRUE	-	5	10	0.5	0.38985	-2.50114	-2	4
32	BRD4	1183	1160	D	1	D	TRUE	E	9	10	0	0.8366	0.26372	2	5
33	BRD4	1185	1162	H	1	H	TRUE	R	9	10	0	0.85365	0.36925	0	5
34	BRD4	1186	1163	K	1	K	TRUE	A	7	10	0	0.72657	-0.41723	-1	2.13889
35	BRD4	1240	1217	L	1	L	TRUE	M	9	10	0	0.91875	0.77216	2	5
36	BRD4	1258	1235	A	1	A	TRUE	P	9	10	0	0.87156	0.48013	-1	7
37	BRD4	1378	1355	Q	1	Q	TRUE	-	8	10	0.8	0.10036	-4.29277	1
90	C14ORF132	140	140	T	1	T	TRUE	A	1	4	0	0.64186	0.55385	0	-0.33333
91	C14ORF132	148	148	L	1	L	TRUE	P	2	4	0	0.73717	0.84376	-2.33333	1.66667
0	C19ORF53	83	81	R	1	R	TRUE	K	9	10	0	0.8429	0.58539	2	5
1	C19ORF53	97	92	T	1	T	TRUE	S	6	10	0.1	0.6646	-0.5548	0.5	1.96429
3	C19ORF53	100	95	K	1	K	TRUE	T	6	10	0.1	0.69664	-0.34992	-1	2.42857
0	C6ORF165	40	3	L	1	L	TRUE	P	9	10	0	0.87156	0.63882	-3	7
1	C6ORF165	203	166	H	1	H	TRUE	Q	9	10	0	0.89297	0.76487	0	5
2	C6ORF165	204	167	S	1	S	TRUE	A	7	10	0	0.7154	-0.28078	1	2.47222
3	C6ORF165	213	176	T	1	T	TRUE	S	9	10	0	0.8366	0.43291	1	4
4	C6ORF165	295	258	E	1	E	TRUE	Q	9	10	0	0.89297	0.76487	2	5
5	C6ORF165	340	303	L	1	L	TRUE	Q	9	10	0	0.89297	0.76487	-2	5
6	C6ORF165	343	306	S	1	S	TRUE	M	7	10	0	0.79215	0.1712	-1.22222	3.80556
7	C6ORF165	348	311	R	1	R	TRUE	K	9	10	0	0.8429	0.47002	2	5
8	C6ORF165	362	325	S	1	S	TRUE	A	9	10	0	0.7989	0.21094	1	4
9	C6ORF165	382	345	S	1	S	TRUE	N	9	10	0	0.8762	0.6661	1	6
10	C6ORF165	400	363	D	1	D	TRUE	E	8	10	0	0.76332	0.00144	1.66667	4.11111
12	C6ORF165	409	372	D	1	D	TRUE	G	7	10	0	0.65254	-0.65094	-0.77778	2.72222
13	C6ORF165	428	391	R	1	R	TRUE	N	6	10	0	0.70626	-0.33458	0.11111	2.72222
14	C6ORF165	430	393	T	1	T	TRUE	A	7	10	0	0.70376	-0.34932	-0.22222	2.08333
15	C6ORF165	447	410	E	1	E	TRUE	D	7	10	0	0.77925	0.09524	1.55556	4.05556
16	C6ORF165	491	454	E	1	E	TRUE	D	8	10	0	0.79089	0.16375	1.77778	4.88889
17	C6ORF165	502	465	Y	1	Y	TRUE	H	4	10	0	0.74581	-0.10169	-0.11111	2.11111
18	C6ORF165	505	468	G	1	G	TRUE	D	6	10	0	0.73515	-0.16449	-0.88889	2.88889
19	C6ORF165	531	494	V	1	V	TRUE	I	9	10	0	0.8304	0.39641	3	4
20	C6ORF165	568	531	A	1	A	TRUE	S	8	10	0	0.76626	0.01875	0.88889	3.33333
21	C6ORF165	620	583	N	1	N	TRUE	M	6	10	0	0.72904	-0.20043	-1.66667	2.11111
22	C6ORF165	629	592	K	1	K	TRUE	R	9	10	0	0.85365	0.53332	2	5
23	C6ORF165	647	610	A	1	A	TRUE	G	7	10	0	0.70081	-0.36665	-0.22222	2.86111
0	C7ORF57	11	11	V	1	V	TRUE	A	5	10	0	0.64818	-0.66515	-0.22222	1.30556
1	C7ORF57	26	26	T	1	T	TRUE	V	8	10	0	0.71913	-0.19283	0	3.11111
2	C7ORF57	48	48	E	1	E	TRUE	R	6	10	0	0.71807	-0.19987	-0.66667	1.58333
3	C7ORF57	60	60	K	1	K	TRUE	R	9	10	0	0.85365	0.70277	2	5
4	C7ORF57	99	99	A	1	A	TRUE	S	9	10	0	0.8366	0.58925	1	4
5	C7ORF57	116	116	H	1	H	TRUE	R	7	10	0	0.7912	0.28702	0	3.44444
6	C7ORF57	135	135	G	1	G	TRUE	D	8	10	0	0.77598	0.18566	-1.11111	5.11111
7	C7ORF57	139	139	S	1	S	TRUE	G	9	10	0	0.78953	0.27592	0	6
8	C7ORF57	192	192	T	1	T	TRUE	P	8	10	0	0.79316	0.30009	-0.77778	5.22222
25	C7ORF57	237	220	K	1	K	TRUE	R	8	10	0	0.7595	0.07593	1.55556	3.44444
26	C7ORF57	292	266	A	1	A	TRUE	S	6	10	0	0.69069	-0.38214	0.44444	1.63889
0	CAD	152	73	R	1	R	TRUE	S	8	11	0	0.79081	0.03818	-1.4	2.33333
1	CAD	218	139	I	1	I	TRUE	V	10	11	0	0.81043	0.15369	3	4
2	CAD	228	149	Q	1	Q	TRUE	P	10	11	0	0.87156	0.51368	-1	7
3	CAD	248	169	I	1	I	TRUE	V	10	11	0	0.81043	0.15369	3	4
4	CAD	287	208	K	1	K	TRUE	A	7	11	0	0.63151	-0.89981	-0.7	1.57778
5	CAD	292	213	Q	1	Q	TRUE	E	7	11	0	0.66511	-0.70193	1.5	2.55556
6	CAD	313	234	A	1	A	TRUE	S	10	11	0	0.8366	0.30779	1	4
7	CAD	460	381	A	1	A	TRUE	P	8	11	0	0.71661	-0.39874	-1	3.42222
8	CAD	464	385	A	1	A	TRUE	T	8	11	0	0.74604	-0.22542	-0.2	2.84444
9	CAD	574	495	S	1	S	TRUE	A	10	11	0	0.7989	0.08583	1	4
10	CAD	943	864	Y	1	Y	TRUE	H	7	11	0	0.8435	0.34844	1.1	4.06667
11	CAD	1003	924	K	1	K	TRUE	T	7	11	0	0.76739	-0.09969	-0.7	2.73333
12	CAD	1226	1147	E	1	E	TRUE	A	8	11	0	0.70738	-0.45308	-0.8	2.93333
13	CAD	1255	1176	T	1	T	TRUE	A	7	11	0	0.7243	-0.35343	-0.3	1.86667
15	CAD	1590	1511	V	1	V	TRUE	I	7	11	0	0.73665	-0.28072	2.1	1.73333
16	CAD	1778	1699	Q	1	Q	TRUE	R	8	11	0	0.76085	-0.13824	1	3.93333
17	CAD	1823	1744	Q	1	Q	TRUE	P	7	11	0	0.65852	-0.74074	-1.2	2.22222
18	CAD	1945	1866	V	1	V	TRUE	-	8	11	0.72727	0.15868	-3.6839	0.5	-1
19	CAD	1955	1876	Q	1	Q	TRUE	-	8	11	0.72727	0.19386	-3.47679	-0.5	-3
20	CAD	2086	2007	S	1	S	TRUE	A	10	11	0	0.7989	0.08583	1	4
21	CAD	2087	2008	M	1	M	TRUE	V	10	11	0	0.81043	0.15369	1	4
22	CAD	2104	2025	V	1	V	TRUE	A	10	11	0	0.7989	0.08583	0	4
23	CAD	2321	2210	M	1	M	TRUE	V	10	11	0	0.81043	0.15369	1	4
0	CALCOCO2	43	3	K	1	K	TRUE	E	6	8	0	0.75369	0.45589	0.71429	4.14286
1	CALCOCO2	57	17	R	1	R	TRUE	H	6	8	0	0.83509	0.83639	-0.28571	5.42857
2	CALCOCO2	85	45	A	1	A	TRUE	T	7	8	0	0.84502	0.88283	0	5
3	CALCOCO2	140	76	A	1	A	TRUE	T	5	8	0	0.76367	0.50253	-0.28571	2.2381
4	CALCOCO2	143	79	S	1	S	TRUE	I	2	8	0	0.55636	-0.46652	-0.85714	0.42857
5	CALCOCO2	145	81	I	1	I	TRUE	L	5	8	0	0.63925	-0.07904	1.42857	1.57143
6	CALCOCO2	236	172	S	1	S	TRUE	D	6	8	0.125	0.68427	0.13141	0	6
7	CALCOCO2	267	203	T	1	T	TRUE	D	6	8	0	0.74131	0.39803	-0.85714	3.71429
8	CALCOCO2	279	215	H	1	H	TRUE	Q	6	8	0	0.79868	0.66619	0	4.14286
9	CALCOCO2	283	219	V	1	V	TRUE	M	5	8	0	0.77171	0.54011	0.42857	2.52381
10	CALCOCO2	319	255	A	1	A	TRUE	T	6	8	0	0.75388	0.4568	-0.14286	3.28571
12	CALCOCO2	327	263	N	1	N	TRUE	K	5	8	0	0.73663	0.37616	0	3.09524
13	CALCOCO2	342	278	Q	1	Q	TRUE	H	4	8	0	0.7272	0.33207	0.28571	2.38095
14	CALCOCO2	349	285	I	1	I	TRUE	T	6	8	0	0.75388	0.4568	-1.28571	3.28571
15	CALCOCO2	352	288	D	1	D	TRUE	E	4	8	0	0.68625	0.14063	1.14286	2.42857
16	CALCOCO2	377	312	R	1	R	TRUE	K	6	8	0	0.77712	0.56543	1.71429	3.57143
17	CALCOCO2	393	328	R	1	R	TRUE	K	6	8	0	0.74745	0.42671	1.28571	3
18	CALCOCO2	405	340	K	1	K	TRUE	R	6	8	0	0.74891	0.43353	1.42857	2.71429
19	CALCOCO2	423	358	C	1	C	TRUE	Y	6	8	0	0.80745	0.7072	-2.14286	4.42857
20	CALCOCO2	463	398	F	1	F	TRUE	P	5	8	0.125	0.65016	-0.02804	-2.83333	3.66667
21	CALCOCO2	502	435	R	1	R	TRUE	K	4	8	0.125	0.59946	-0.26507	1	1.8
14	CCDC148	60	4	R	1	R	TRUE	E	5	10	0	0.69299	-0.33843	-0.88889	1.27778
15	CCDC148	65	9	M	1	M	TRUE	K	7	10	0	0.75583	0.03257	-1	3.83333
16	CCDC148	124	68	K	1	K	TRUE	E	6	10	0	0.66296	-0.51568	0.33333	1.80556
17	CCDC148	127	71	F	1	F	TRUE	C	6	10	0	0.77788	0.16276	-0.88889	3
18	CCDC148	132	76	D	1	D	TRUE	E	9	10	0	0.8366	0.5094	2	5
21	CCDC148	153	97	S	1	S	TRUE	F	9	10	0	0.86927	0.70231	-2	6
22	CCDC148	162	106	S	1	S	TRUE	C	9	10	0	0.91875	0.99441	-1	9
24	CCDC148	173	117	L	1	L	TRUE	Q	8	10	0	0.84739	0.5731	-2.11111	3.88889
25	CCDC148	185	129	N	1	N	TRUE	H	8	10	0	0.85069	0.59261	0.66667	5.77778
26	CCDC148	192	136	A	1	A	TRUE	S	4	10	0	0.71691	-0.19719	0.11111	0.44444
28	CCDC148	232	176	G	1	G	TRUE	D	9	10	0	0.85147	0.59722	-1	6
29	CCDC148	240	184	Y	1	Y	TRUE	H	9	10	0	0.91606	0.97851	2	8
30	CCDC148	241	185	C	1	C	TRUE	S	9	10	0	0.8366	0.5094	-1	4
31	CCDC148	248	192	-	1	-	TRUE	L	8	10	0.1	0.7139	-0.21498		2.44444
32	CCDC148	272	215	K	1	K	TRUE	N	7	10	0	0.78064	0.17904	0	4
33	CCDC148	290	233	V	1	V	TRUE	L	7	10	0	0.65888	-0.53979	0.22222	1.58333
35	CCDC148	296	239	N	1	N	TRUE	Y	5	10	0	0.69796	-0.30904	-1.77778	1.27778
36	CCDC148	349	292	H	1	H	TRUE	Y	9	10	0	0.89297	0.84221	2	7
37	CCDC148	365	308	E	1	E	TRUE	S	3	10	0	0.52747	-1.31561	-0.44444	-0.22222
38	CCDC148	394	337	I	1	I	TRUE	M	5	10	0	0.70957	-0.24051	0.44444	1.58333
39	CCDC148	404	347	D	1	D	TRUE	E	9	10	0	0.8366	0.5094	2	5
40	CCDC148	427	357	F	1	F	TRUE	L	6	10	0	0.61915	-0.77436	-0.77778	0.72222
42	CCDC148	441	371	I	1	I	TRUE	M	9	10	0	0.91875	0.99441	1	5
43	CCDC148	445	375	S	1	S	TRUE	A	8	10	0	0.72421	-0.15407	0.88889	2.88889
44	CCDC148	465	395	K	1	K	TRUE	Q	7	10	0	0.80167	0.3032	1.22222	3.44444
46	CCDC148	467	397	K	1	K	TRUE	E	7	10	0	0.7246	-0.15181	0.55556	2.63889
47	CCDC148	504	434	K	1	K	TRUE	E	9	10	0	0.8366	0.5094	1	5
48	CCDC148	507	437	E	1	E	TRUE	V	6	10	0	0.6006	-0.88386	-2.11111	2.05556
49	CCDC148	518	448	Q	1	Q	TRUE	E	8	10	0	0.76608	0.09308	1.77778	4.33333
50	CCDC148	523	453	H	1	H	TRUE	R	9	10	0	0.85365	0.61007	0	5
51	CCDC148	575	505	A	1	A	TRUE	G	8	10	0	0.72105	-0.17273	-0.22222	4.44444
52	CCDC148	576	506	V	1	V	TRUE	I	6	10	0	0.59229	-0.9329	1.77778	1.05556
53	CCDC148	625	555	V	1	V	TRUE	I	6	10	0	0.69357	-0.33496	2.33333	2.58333
0	CCNDBP1	70	4	E	1	E	TRUE	A	5	10	0	0.66435	0.37279	-1	1.77778
1	CCNDBP1	85	12	L	1	L	TRUE	P	6	10	0	0.6987	0.48436	-2.44444	2.58333
2	CCNDBP1	99	26	A	1	A	TRUE	E	4	10	0	0.60171	0.1693	-0.66667	0.41667
3	CCNDBP1	131	43	S	1	S	TRUE	T	6	10	0.2	0.51897	-0.09945	0.71429	3.28571
4	CCNDBP1	139	51	V	1	V	TRUE	T	3	10	0	0.57945	0.097	-0.44444	-0.11111
5	CCNDBP1	153	65	W	1	W	TRUE	G	4	10	0	0.57992	0.09852	-2.44444	0.36111
7	CCNDBP1	179	89	S	1	S	TRUE	C	9	10	0	0.91873	1.19907	-1	9
9	CCNDBP1	231	141	P	1	P	TRUE	A	3	10	0	0.56907	0.06329	-1.22222	0.91667
10	CCNDBP1	239	148	N	1	N	TRUE	D	5	10	0.3	0.56456	0.04865	0.83333	4.66667
11	CCNDBP1	245	154	N	1	N	TRUE	S	9	10	0	0.83658	0.93221	1	4
27	CCNDBP1	320	228	-	1	-	TRUE	D	9	10	0.1	0.85145	0.98053		6
28	CCNDBP1	321	228	-	1	-	TRUE	N	6	10	0.1	0.76915	0.71319		3.33333
29	CCNDBP1	357	261	S	1	S	TRUE	A	9	10	0	0.79888	0.80977	1	4
30	CCNDBP1	423	327	R	1	R	TRUE	K	6	10	0	0.60801	0.18977	0.66667	1.36111
76	CCNDBP1	522	415	-	1	-	TRUE	E	8	10	0.1	0.78891	0.77737		4.33333
77	CCNDBP1	523	415	-	1	-	TRUE	L	6	10	0.1	0.61442	0.21059		1.33333
1	CCT7	236	236	T	1	T	TRUE	K	5	11	0	0.79913	-0.52325	-1	1.66667
2	CCT7	344	344	Y	1	Y	TRUE	R	7	11	0	0.73171	-1.74763	-1.2	2.31111
3	CCT7	489	489	D	1	D	TRUE	E	8	11	0	0.77556	-0.95129	1.6	3.93333
4	CCT7	541	540	L	1	L	TRUE	G	9	11	0	0.70635	-2.20822	-3.7	4.8
5	CCT7	542	541	Q	1	Q	TRUE	R	10	11	0	0.85365	0.46698	1	5
6	CCT7	543	542	-	1	-	TRUE	P	6	11	0.09091	0.67336	-2.80743		0.68889
7	CCT7	544	542	-	1	-	TRUE	H	10	11	0.09091	0.91606	1.60048		8
0	CD276	3	3	H	1	H	TRUE	-	1	3	0.33333	0.60103	-0.89882	0
1	CD276	5	5	L	1	L	TRUE	-	1	3	0.33333	0.60103	-0.89882	-2
2	CD276	6	6	V	1	V	TRUE	-	1	3	0.33333	0.55588	-1.22841	-3
3	CD276	16	16	T	1	T	TRUE	-	1	3	0.33333	0.56248	-1.18025	0
4	CD276	20	20	V	1	V	TRUE	-	1	3	0.33333	0.56248	-1.18025	0
5	CD276	22	22	C	1	C	TRUE	-	1	3	0.33333	0.66715	-0.41604	-2
6	CD276	27	27	E	1	E	TRUE	-	1	3	0.33333	0.55588	-1.22841	-2
8	CD276	30	30	A	1	A	TRUE	-	1	3	0.33333	0.58902	-0.98647	-1
9	CD276	31	31	I	1	I	TRUE	-	1	3	0.33333	0.57059	-1.12101	3
12	CD276	70	70	M	1	M	TRUE	-	1	3	0.33333	0.59495	-0.94316	-1
13	CD276	71	71	N	1	N	TRUE	-	1	3	0.33333	0.5995	-0.91	1
16	CD276	111	97	G	1	G	TRUE	-	1	3	0.33333	0.60103	-0.89882	-2
17	CD276	113	99	C	1	C	TRUE	-	1	3	0.33333	0.60103	-0.89882	-3
18	CD276	123	109	L	1	L	TRUE	-	1	3	0.33333	0.61203	-0.8185	0
19	CD276	125	111	G	1	G	TRUE	-	1	3	0.33333	0.58902	-0.98647	0
20	CD276	127	113	Q	1	Q	TRUE	-	1	3	0.33333	0.60103	-0.89882	1
28	CD276	156	142	S	1	S	TRUE	-	1	3	0.33333	0.6169	-0.7829	1
29	CD276	160	146	W	1	W	TRUE	-	1	3	0.33333	0.60103	-0.89882	-3
30	CD276	163	149	S	1	S	TRUE	-	1	3	0.33333	0.5995	-0.91	0
31	CD276	164	150	M	1	M	TRUE	-	1	3	0.33333	0.59495	-0.94316	-1
32	CD276	172	158	H	1	H	TRUE	-	1	3	0.33333	0.62871	-0.69668	2
33	CD276	173	159	W	1	W	TRUE	-	1	3	0.33333	0.62871	-0.69668	-2
34	CD276	177	163	K	1	K	TRUE	-	1	3	0.33333	0.58902	-0.98647	1
35	CD276	178	164	V	1	V	TRUE	-	1	3	0.33333	0.56248	-1.18025	0
36	CD276	179	165	K	1	K	TRUE	-	1	3	0.33333	0.58902	-0.98647	1
37	CD276	187	173	D	1	D	TRUE	-	1	3	0.33333	0.55588	-1.22841	-1
38	CD276	188	174	T	1	T	TRUE	-	1	3	0.33333	0.57059	-1.12101	0
39	CD276	189	175	S	1	S	TRUE	-	1	3	0.33333	0.61364	-0.80671	-1
40	CD276	196	182	M	1	M	TRUE	-	1	3	0.33333	0.59495	-0.94316	-1
41	CD276	211	197	M	1	M	TRUE	C	1	3	0	0.78406	0.43747	0	-1
42	CD276	219	205	D	1	D	TRUE	-	1	3	0.33333	0.6169	-0.7829	1
43	CD276	227	213	C	1	C	TRUE	C	1	3	0	0.71291	-0.08199	-2	-2
44	CD276	228	214	S	1	S	TRUE	-	1	3	0.33333	0.6169	-0.7829	1
45	CD276	235	221	T	1	T	TRUE	-	1	3	0.33333	0.56248	-1.18025	0
46	CD276	243	229	S	1	S	TRUE	-	1	3	0.33333	0.61364	-0.80671	-1
47	CD276	244	230	H	1	H	TRUE	-	1	3	0.33333	0.62871	-0.69668	0
48	CD276	245	231	S	1	S	TRUE	-	1	3	0.33333	0.60103	-0.89882	-1
49	CD276	271	257	H	1	H	TRUE	R	2	3	0	0.85365	0.94554	0	5
50	CD276	302	288	A	1	A	TRUE	T	2	3	0	0.84502	0.88257	0	5
52	CD276	316	302	M	1	M	TRUE	A	2	3	0	0.7989	0.54584	-1	4
53	CD276	333	319	G	1	G	TRUE	R	2	3	0	0.85365	0.94554	-2	5
54	CD276	374	360	S	1	S	TRUE	N	2	3	0	0.8762	1.11017	1	6
55	CD276	388	374	F	1	F	TRUE	S	2	3	0	0.8366	0.82105	-2	4
56	CD276	390	376	H	1	H	TRUE	Y	2	3	0	0.89297	1.23262	2	7
57	CD276	399	385	I	1	I	TRUE	F	2	3	0	0.86927	1.05961	0	6
58	CD276	406	392	T	1	T	TRUE	V	2	3	0	0.81043	0.62998	0	4
59	CD276	427	413	R	1	R	TRUE	H	2	3	0	0.91606	1.40119	0	8
60	CD276	437	423	D	1	D	TRUE	N	2	3	0	0.8762	1.11017	1	6
32	CDC20	86	86	L	1	L	TRUE	P	8	11	0	0.71996	-0.16706	-2.1	3.53333
1	CDK5RAP3	32	7	L	1	L	TRUE	V	9	10	0	0.81043	0.25345	1	4
2	CDK5RAP3	220	191	T	1	T	TRUE	A	9	10	0	0.7989	0.18936	0	4
3	CDK5RAP3	291	261	L	1	L	TRUE	V	9	10	0	0.81043	0.25345	1	4
4	CDK5RAP3	303	273	M	1	M	TRUE	V	6	10	0.1	0.61266	-0.84647	1.25	2.71429
5	CDK5RAP3	305	275	T	1	T	TRUE	A	3	10	0.1	0.53038	-1.30408	-0.25	0.46429
6	CDK5RAP3	311	278	N	1	N	TRUE	D	8	10	0.1	0.76236	-0.01387	1	6
7	CDK5RAP3	321	286	S	1	S	TRUE	A	6	10	0.1	0.65061	-0.63543	0.5	1.96429
8	CDK5RAP3	338	303	V	1	V	TRUE	G	5	10	0	0.60143	-0.90891	-1.88889	2.08333
9	CDK5RAP3	339	304	E	1	E	TRUE	D	9	10	0	0.85147	0.48174	2	6
0	CEP135	4	4	T	1	T	TRUE	A	9	10	0	0.7989	0.09038	0	4
1	CEP135	27	27	L	1	L	TRUE	V	9	10	0	0.81043	0.19561	1	4
2	CEP135	184	184	G	1	G	TRUE	S	8	10	0	0.74725	-0.38118	0	3.33333
3	CEP135	200	200	E	1	E	TRUE	Q	7	10	0	0.84174	0.48152	1.55556	3.13889
4	CEP135	215	215	H	1	H	TRUE	Q	9	10	0	0.89297	0.94929	0	5
5	CEP135	225	225	N	1	N	TRUE	S	7	10	0	0.74511	-0.4008	0.77778	2.47222
6	CEP135	227	227	I	1	I	TRUE	L	5	10	0	0.65949	-1.18258	2.44444	2.33333
7	CEP135	228	228	K	1	K	TRUE	R	7	10	0	0.70205	-0.79397	1.44444	2.66667
8	CEP135	247	247	T	1	T	TRUE	A	8	10	0	0.71759	-0.65203	0	3.11111
9	CEP135	296	296	K	1	K	TRUE	E	9	10	0	0.8366	0.43456	1	5
10	CEP135	422	410	M	1	M	TRUE	I	4	10	0	0.5892	-1.82429	1.22222	2.72222
11	CEP135	424	412	G	1	G	TRUE	S	8	10	0	0.77454	-0.13203	0	3.33333
12	CEP135	427	415	A	1	A	TRUE	V	8	10	0	0.73636	-0.48062	0	3.11111
13	CEP135	428	416	I	1	I	TRUE	T	9	10	0	0.84502	0.5115	-1	5
14	CEP135	495	483	H	1	H	TRUE	I	3	10	0	0.52647	-2.39708	-2.11111	-0.72222
15	CEP135	514	502	A	1	A	TRUE	T	9	10	0	0.84502	0.5115	0	5
16	CEP135	554	542	K	1	K	TRUE	E	9	10	0	0.8366	0.43456	1	5
17	CEP135	571	559	G	1	G	TRUE	V	5	10	0	0.55883	-2.10167	-1.77778	0.47222
18	CEP135	576	564	L	1	L	TRUE	V	7	10	0	0.71466	-0.67877	1.22222	3.61111
19	CEP135	595	583	E	1	E	TRUE	A	9	10	0	0.7989	0.09038	-1	4
20	CEP135	616	604	T	1	T	TRUE	S	9	10	0	0.8366	0.43456	1	4
21	CEP135	663	651	Q	1	Q	TRUE	K	9	10	0	0.8429	0.4921	1	5
22	CEP135	664	652	I	1	I	TRUE	L	8	10	0	0.71525	-0.67344	1.77778	3.11111
23	CEP135	666	654	Q	1	Q	TRUE	-	9	10	0.9	0.03283	-6.90435
24	CEP135	667	655	I	1	I	TRUE	-	9	10	0.9	0.03283	-6.90435
25	CEP135	668	656	G	1	G	TRUE	-	9	10	0.9	0.03283	-6.90435
26	CEP135	671	659	P	1	P	TRUE	A	6	10	0	0.65402	-1.23245	-1.11111	1.47222
27	CEP135	689	677	D	1	D	TRUE	E	9	10	0	0.8366	0.43456	2	5
28	CEP135	700	688	R	1	R	TRUE	H	9	10	0	0.91606	1.1601	0	8
30	CEP135	721	709	G	1	G	TRUE	E	7	10	0	0.77412	-0.13587	-2	3.83333
31	CEP135	724	712	N	1	N	TRUE	G	4	10	0	0.5526	-2.15855	0.33333	0.86111
32	CEP135	736	724	A	1	A	TRUE	E	9	10	0	0.8366	0.43456	-1	5
33	CEP135	765	753	L	1	L	TRUE	I	9	10	0	0.8304	0.37797	2	4
34	CEP135	767	755	D	1	D	TRUE	N	7	10	0	0.72184	-0.61325	0.66667	3.69444
35	CEP135	773	761	E	1	E	TRUE	A	7	10	0	0.62703	-1.47896	-1.44444	2
36	CEP135	784	772	K	1	K	TRUE	I	6	10	0	0.62856	-1.46491	-2.66667	3.16667
37	CEP135	791	779	L	1	L	TRUE	S	7	10	0	0.69224	-0.88351	-1.88889	2.5
38	CEP135	793	781	K	1	K	TRUE	L	6	10	0	0.6556	-1.21809	-1.77778	2.69444
39	CEP135	799	787	A	1	A	TRUE	T	8	10	0	0.76596	-0.2104	0.11111	4.11111
40	CEP135	814	802	V	1	V	TRUE	L	9	10	0	0.77317	-0.14455	1	4
41	CEP135	817	805	C	1	C	TRUE	A	7	10	0	0.65492	-1.2243	-0.22222	2.55556
42	CEP135	843	831	S	1	S	TRUE	A	9	10	0	0.7989	0.09038	1	4
43	CEP135	851	839	A	1	A	TRUE	E	5	10	0	0.77205	-0.15477	-1	3.33333
44	CEP135	860	848	M	1	M	TRUE	V	8	10	0	0.73048	-0.53437	1	3.77778
45	CEP135	880	868	C	1	C	TRUE	W	9	10	0	0.94756	1.44774	-2	11
46	CEP135	889	877	Q	1	Q	TRUE	K	9	10	0	0.8429	0.4921	1	5
47	CEP135	951	939	V	1	V	TRUE	I	7	10	0	0.78504	-0.03618	2.55556	2.86111
48	CEP135	973	961	D	1	D	TRUE	E	9	10	0	0.8366	0.43456	2	5
49	CEP135	1016	1004	D	1	D	TRUE	E	9	10	0	0.8366	0.43456	2	5
50	CEP135	1027	1015	M	1	M	TRUE	V	7	10	0	0.71819	-0.64661	1	3.61111
51	CEP135	1062	1050	T	1	T	TRUE	S	9	10	0	0.8366	0.43456	1	4
52	CEP135	1087	1075	V	1	V	TRUE	L	9	10	0	0.77317	-0.14455	1	4
53	CEP135	1095	1083	A	1	A	TRUE	T	7	10	0	0.74932	-0.36236	0.22222	3.41667
54	CEP135	1099	1087	S	1	S	TRUE	A	7	10	0	0.71196	-0.70346	1	2.47222
55	CEP135	1110	1098	T	1	T	TRUE	V	4	10	0	0.62417	-1.50503	0	0.16667
19	CLK3	103	27	W	1	W	TRUE	-	8	9	0.88889	0.03283	-2.6211
22	CLK3	110	30	L	1	L	TRUE	-	6	9	0.66667	0.36815	-1.26852	1	4
30	CLK3	124	42	L	1	L	TRUE	-	8	9	0.88889	0.03283	-2.6211
31	CLK3	125	43	P	1	P	TRUE	-	8	9	0.88889	0.03283	-2.6211
33	CLK3	127	45	S	1	S	TRUE	-	8	9	0.88889	0.03283	-2.6211
35	CLK3	130	47	L	1	L	TRUE	-	7	9	0.77778	0.09557	-2.36803	2
51	CLK3	152	65	R	1	R	TRUE	-	5	9	0.55556	0.46718	-0.86904	0	5
53	CLK3	218	105	A	1	A	TRUE	S	8	9	0	0.83659	0.62109	1	4
0	CLNS1A	3	3	P	1	P	TRUE	-	7	10	0.7	0.20191	-5.69484	-1	4
1	CLNS1A	4	4	G	1	G	TRUE	-	7	10	0.7	0.21035	-5.61565	-2	7
2	CLNS1A	5	5	T	1	T	TRUE	-	7	10	0.7	0.19281	-5.7802	0	4
3	CLNS1A	17	17	Q	1	Q	TRUE	S	6	10	0	0.75682	-0.49062	-0.33333	1.75
4	CLNS1A	18	18	D	1	D	TRUE	A	8	10	0	0.7297	-0.74501	-1.88889	3.11111
5	CLNS1A	39	39	I	1	I	TRUE	T	9	10	0	0.84502	0.33655	-1	5
6	CLNS1A	129	129	V	1	V	TRUE	A	9	10	0	0.7989	-0.096	0	4
0	CLPB	1	1	M	1	M	TRUE	-	8	9	0.88889	0.03283	-9.96629
1	CLPB	5	5	F	1	F	TRUE	S	7	9	0	0.76136	-0.60569	-2	3.25
2	CLPB	16	16	Q	1	Q	TRUE	R	8	9	0	0.85365	0.58007	1	5
3	CLPB	25	25	A	1	A	TRUE	P	7	9	0	0.7941	-0.18504	-0.75	5
4	CLPB	33	33	V	1	V	TRUE	A	8	9	0	0.7989	-0.12335	0	4
5	CLPB	41	41	R	1	R	TRUE	G	8	9	0	0.78953	-0.2437	-2	6
6	CLPB	64	64	P	1	P	TRUE	L	5	9	0	0.61916	-2.43275	-3.125	1.75
7	CLPB	65	65	L	1	L	TRUE	P	4	9	0	0.69155	-1.50267	-2.125	1.57143
8	CLPB	81	81	N	1	N	TRUE	T	6	9	0	0.74365	-0.83319	-0.75	2.39286
9	CLPB	83	83	L	1	L	TRUE	C	4	9	0	0.74405	-0.82814	-1.375	1.07143
10	CLPB	85	85	S	1	S	TRUE	A	6	9	0	0.71044	-1.25997	1	2.32143
11	CLPB	88	88	P	1	P	TRUE	T	4	9	0	0.63062	-2.28548	-1	1.78571
12	CLPB	89	89	C	1	C	TRUE	W	5	9	0	0.76337	-0.57988	-1.875	2.39286
13	CLPB	106	106	K	1	K	TRUE	N	8	9	0	0.8762	0.8698	0	6
14	CLPB	109	109	S	1	S	TRUE	P	6	9	0	0.73954	-0.88603	-1.25	2.60714
15	CLPB	132	132	S	1	S	TRUE	P	8	9	0	0.87156	0.81027	-1	7
16	CLPB	163	163	T	1	T	TRUE	A	8	9	0	0.7989	-0.12335	0	4
47	CLPB	672	642	T	1	T	TRUE	A	8	9	0	0.7989	-0.12335	0	4
0	CMPK1	3	3	R	1	R	TRUE	S	8	11	0	0.76714	-0.7642	-0.8	2.97778
1	CMPK1	6	6	C	1	C	TRUE	G	4	11	0	0.59285	-3.40517	-2.7	0.44444
2	CMPK1	7	7	G	1	G	TRUE	R	7	11	0	0.7224	-1.44209	-1.7	1.6
3	CMPK1	17	17	S	1	S	TRUE	F	9	11	0	0.82828	0.16233	-1.9	4.4
5	CMPK1	23	23	L	1	L	TRUE	R	7	11	0.27273	0.59305	-3.40216	-2	5
6	CMPK1	31	30	S	1	S	TRUE	R	7	11	0	0.75398	-0.96356	-0.9	2.66667
7	CMPK1	117	116	E	1	E	TRUE	Q	10	11	0	0.89297	1.14261	2	5
8	CMPK1	155	154	D	1	D	TRUE	N	10	11	0	0.8762	0.88845	1	6
0	CMTM3	36	1	-	1	-	TRUE	M	8	10	0.1	0.81862	1.02496		4.33333
1	CMTM3	37	1	-	1	-	TRUE	W	8	10	0.1	0.81619	1.01451		7.88889
38	CMTM3	212	119	T	1	T	TRUE	S	9	10	0	0.83659	1.10226	1	4
39	CMTM3	216	123	N	1	N	TRUE	T	8	10	0	0.77937	0.85605	-0.22222	3.44444
40	CMTM3	219	126	Q	1	Q	TRUE	D	3	10	0	0.5619	-0.07966	-0.33333	0.44444
0	COA5	15	15	T	1	T	TRUE	A	7	9	0	0.6994	-1.73096	-0.25	3
0	COL4A2	3	3	Q	1	Q	TRUE	R	7	9	0.11111	0.74114	-0.53286	1	5
1	COL4A2	22	22	L	1	L	TRUE	V	8	9	0	0.81043	0.23749	1	4
2	COL4A2	23	23	A	1	A	TRUE	T	7	9	0	0.80281	0.15278	-0.125	3.5
3	COL4A2	38	38	Y	1	Y	TRUE	F	3	9	0	0.6224	-1.85299	0.25	0.35714
4	COL4A2	98	98	T	1	T	TRUE	I	5	9	0	0.67091	-1.31364	-0.875	1
5	COL4A2	99	99	A	1	A	TRUE	T	8	9	0	0.84502	0.62213	0	5
6	COL4A2	153	153	A	1	A	TRUE	G	5	9	0	0.63132	-1.75376	-0.5	1.57143
10	COL4A2	282	281	R	1	R	TRUE	E	6	9	0	0.77324	-0.17597	0.25	3.71429
11	COL4A2	292	291	V	1	V	TRUE	L	7	9	0	0.69858	-1.00594	0.625	2.5
12	COL4A2	307	306	P	1	P	TRUE	A	3	9	0	0.59252	-2.18516	-2.375	0.32143
13	COL4A2	308	307	S	1	S	TRUE	P	8	9	0	0.87156	0.91722	-1	7
14	COL4A2	331	330	T	1	T	TRUE	P	8	9	0	0.87156	0.91722	-1	7
15	COL4A2	387	386	T	1	T	TRUE	P	6	9	0	0.6905	-1.09579	-0.75	3.10714
16	COL4A2	394	393	F	1	F	TRUE	I	5	9	0	0.70768	-0.9048	-0.375	3.46429
17	COL4A2	413	412	Q	1	Q	TRUE	I	3	9	0	0.55197	-2.63597	-1.5	0.17857
18	COL4A2	421	420	F	1	F	TRUE	L	6	9	0	0.65578	-1.4818	0	1.42857
19	COL4A2	437	436	A	1	A	TRUE	P	5	9	0	0.65498	-1.49077	-0.75	1.46429
20	COL4A2	449	448	Y	1	Y	TRUE	F	8	9	0	0.86927	0.89173	3	6
21	COL4A2	489	488	S	1	S	TRUE	G	4	9	0.33333	0.44127	-3.8667	0	3.2
22	COL4A2	506	505	S	1	S	TRUE	P	5	9	0	0.73621	-0.58762	-0.25	2.39286
23	COL4A2	536	535	S	1	S	TRUE	P	8	9	0	0.87156	0.91722	-1	7
25	COL4A2	598	597	Q	1	Q	TRUE	K	7	9	0	0.76925	-0.22031	1	4.25
26	COL4A2	660	659	P	1	P	TRUE	I	5	9	0	0.57173	-2.41632	-2.625	0.92857
27	COL4A2	678	677	L	1	L	TRUE	I	5	9	0	0.70777	-0.90385	1.625	3.46429
28	COL4A2	684	683	R	1	R	TRUE	G	5	9	0	0.60713	-2.02271	-1.375	1.53571
29	COL4A2	692	691	R	1	R	TRUE	Q	5	9	0	0.69202	-1.07887	-0.125	0.82143
30	COL4A2	711	710	L	1	L	TRUE	S	5	9	0	0.67207	-1.30071	-2.125	1.42857
31	COL4A2	716	715	T	1	T	TRUE	A	2	9	0	0.54032	-2.76552	-1	-0.21429
32	COL4A2	835	834	R	1	R	TRUE	L	7	9	0	0.72221	-0.74323	-1.625	2.5
33	COL4A2	856	855	R	1	R	TRUE	L	5	9	0	0.65501	-1.49039	-1.625	0.17857
34	COL4A2	904	903	T	1	T	TRUE	S	6	9	0	0.73046	-0.6516	0.5	2.17857
35	COL4A2	935	934	V	1	V	TRUE	L	6	9	0	0.70362	-0.94996	0.25	1.10714
38	COL4A2	1022	1020	A	1	A	TRUE	S	7	9	0	0.73724	-0.57613	0.875	3
39	COL4A2	1058	1054	T	1	T	TRUE	P	3	9	0	0.58586	-2.25921	-0.25	0.39286
40	COL4A2	1084	1080	F	1	F	TRUE	L	6	9	0	0.66824	-1.34332	-0.25	2.71429
41	COL4A2	1140	1136	A	1	A	TRUE	T	8	9	0	0.84502	0.62213	0	5
42	COL4A2	1145	1141	T	1	T	TRUE	V	5	9	0	0.68317	-1.17731	0	1.85714
43	COL4A2	1151	1147	P	1	P	TRUE	L	7	9	0	0.71078	-0.87039	-3.125	3
45	COL4A2	1164	1160	R	1	R	TRUE	Q	5	9	0	0.76863	-0.2272	0.125	1.53571
46	COL4A2	1222	1218	E	1	E	TRUE	D	8	9	0	0.85147	0.69383	2	6
47	COL4A2	1250	1246	R	1	R	TRUE	Q	8	9	0	0.89297	1.1552	1	5
48	COL4A2	1310	1306	F	1	F	TRUE	L	8	9	0	0.77317	-0.1767	0	4
49	COL4A2	1323	1319	S	1	S	TRUE	P	4	9	0	0.66223	-1.4101	0	1.35714
50	COL4A2	1328	1324	N	1	N	TRUE	T	4	9	0	0.54294	-2.7364	0.125	0.57143
51	COL4A2	1397	1393	V	1	V	TRUE	I	7	9	0	0.7252	-0.71001	2.75	3.5
52	COL4A2	1400	1395	L	1	L	TRUE	Q	7	9	0	0.80983	0.23084	-2.125	4.25
53	COL4A2	1401	1396	T	1	T	TRUE	K	5	9	0	0.68245	-1.18534	-1	2.35714
54	COL4A2	1403	1398	S	1	S	TRUE	A	7	9	0	0.75792	-0.3463	0.75	3
55	COL4A2	1480	1475	I	1	I	TRUE	S	8	9	0	0.8366	0.52845	-2	4
0	COQ6	2	2	V	1	V	TRUE	-	8	11	0.72727	0.17136	-2.04991	0	4
1	COQ6	5	5	V	1	V	TRUE	-	8	11	0.72727	0.17812	-2.02399	3	4
2	COQ6	6	6	S	1	S	TRUE	-	8	11	0.72727	0.16935	-2.05761	0	6
3	COQ6	7	7	V	1	V	TRUE	-	8	11	0.72727	0.16229	-2.08469	-2	-1
5	COQ6	13	13	S	1	S	TRUE	A	5	11	0	0.65075	-0.2119	-0.3	1.22222
6	COQ6	15	15	T	1	T	TRUE	S	5	11	0	0.56303	-0.54822	0.1	-0.06667
7	COQ6	16	16	G	1	G	TRUE	R	8	11	0	0.82429	0.45348	-2	2.28889
8	COQ6	19	19	I	1	I	TRUE	A	6	11	0	0.63804	-0.26062	-1.1	1.86667
10	COQ6	27	27	S	1	S	TRUE	G	9	11	0	0.72361	0.06745	-0.1	4.4
11	COQ6	30	30	I	1	I	TRUE	V	9	11	0	0.71567	0.03701	2.9	3.4
12	COQ6	35	35	C	1	C	TRUE	W	9	11	0	0.85342	0.56515	-2.1	8.4
13	COQ6	38	38	V	1	V	TRUE	A	8	11	0	0.70903	0.01153	-0.4	2.93333
14	COQ6	82	82	R	1	R	TRUE	K	10	11	0	0.84288	0.52475	2	5
15	COQ6	218	218	Y	1	Y	TRUE	H	10	11	0	0.91604	0.80525	2	8
16	COQ6	284	284	D	1	D	TRUE	E	8	11	0	0.72345	0.06685	1.2	2.84444
17	COQ6	328	312	V	1	V	TRUE	T	10	11	0	0.84501	0.5329	0	5
18	COQ6	343	327	T	1	T	TRUE	A	7	11	0	0.63221	-0.28298	0	2.26667
19	COQ6	434	418	A	1	A	TRUE	T	10	11	0	0.84501	0.5329	0	5
21	COQ6	479	463	M	1	M	TRUE	V	10	11	0	0.81041	0.40025	1	4
0	CORO1A	146	146	I	1	I	TRUE	V	10	11	0	0.81043	-0.04319	3	4
1	CORO1A	211	211	I	1	I	TRUE	V	10	11	0	0.81043	-0.04319	3	4
2	CORO1A	383	383	Q	1	Q	TRUE	R	10	11	0	0.85365	0.42951	1	5
3	CORO1A	413	413	T	1	T	TRUE	G	7	11	0	0.61443	-2.18667	-1.3	2.93333
4	CORO1A	437	437	I	1	I	TRUE	M	6	11	0	0.61719	-2.15649	1	1.71111
0	COX5B	16	16	G	1	G	TRUE	A	9	11	0	0.73208	-0.9544	-0.2	3.2
1	COX5B	20	20	C	1	C	TRUE	R	8	11	0	0.80465	0.02105	-3	3.28889
2	COX5B	32	32	S	1	S	TRUE	A	10	11	0	0.7989	-0.05618	1	4
3	COX5B	34	34	R	1	R	TRUE	G	9	11	0	0.70612	-1.3035	-1.9	4.8
4	COX5B	127	127	F	1	F	TRUE	L	8	11	0	0.73225	-0.95222	0	3.31111
0	COX7C	39	39	V	1	V	TRUE	A	7	9	0	0.69994	-1.83624	0.125	2.75
0	CPTP	6	6	A	1	A	TRUE	S	3	9	0.11111	0.52117	-2.80769	0.14286	0.85714
1	CPTP	12	12	L	1	L	TRUE	V	7	9	0	0.73225	-0.59157	1.125	3.75
2	CPTP	18	18	Q	1	Q	TRUE	K	8	9	0	0.8429	0.57019	1	5
3	CPTP	22	22	S	1	S	TRUE	N	4	9	0	0.69044	-1.0305	0.75	1.82143
4	CPTP	24	24	E	1	E	TRUE	K	8	9	0	0.8429	0.57019	1	5
5	CPTP	73	73	H	1	H	TRUE	S	4	9	0	0.6916	-1.01828	-0.5	1.07143
6	CPTP	77	77	M	1	M	TRUE	R	3	9	0	0.57555	-2.2368	-0.75	0.07143
7	CPTP	104	102	T	1	T	TRUE	D	4	9	0	0.64997	-1.45537	-1	2.07143
8	CPTP	110	108	L	1	L	TRUE	V	7	9	0	0.76967	-0.19865	1.125	3.25
9	CPTP	172	170	I	1	I	TRUE	V	7	9	0	0.72061	-0.71377	2.5	3
10	CPTP	201	199	E	1	E	TRUE	N	5	9	0	0.70507	-0.8769	0.5	2.89286
11	CPTP	206	204	V	1	V	TRUE	L	8	9	0	0.77317	-0.16188	1	4
0	CREBZF	47	41	S	1	S	TRUE	A	4	9	0	0.5951	-1.07655	0.5	0.67857
2	CREBZF	64	58	R	1	R	TRUE	G	8	9	0	0.78953	0.14661	-2	6
3	CREBZF	79	71	D	1	D	TRUE	G	8	9	0	0.78953	0.14661	-1	6
0	CRTAP	3	3	L	1	L	TRUE	P	8	10	0	0.798	-0.12229	-2.88889	5.22222
1	CRTAP	21	21	W	1	W	TRUE	L	8	10	0	0.71162	-0.88793	-2.22222	2.44444
2	CRTAP	23	23	T	1	T	TRUE	S	5	10	0	0.65311	-1.40647	0.33333	1.30556
3	CRTAP	90	90	S	1	S	TRUE	A	8	10	0	0.70889	-0.91212	0.88889	3.11111
4	CRTAP	91	91	V	1	V	TRUE	A	9	10	0	0.7989	-0.1143	0	4
5	CRTAP	347	340	F	1	F	TRUE	Y	9	10	0	0.89297	0.71948	3	7
6	CRTAP	408	401	D	1	D	TRUE	S	5	10	0	0.61089	-1.78069	-0.55556	1.75
0	DAB2	183	182	A	1	A	TRUE	M	5	11	0	0.63896	-1.44647	-0.7	1.84444
2	DAB2	204	203	G	1	G	TRUE	A	5	11	0	0.64741	-1.36708	-1	1
3	DAB2	205	204	T	1	T	TRUE	N	6	11	0	0.75086	-0.39495	-0.2	1.46667
4	DAB2	213	212	H	1	H	TRUE	Q	10	11	0	0.89297	0.94036	0	5
5	DAB2	277	275	S	1	S	TRUE	L	10	11	0	0.77317	-0.18533	-2	4
6	DAB2	392	390	Q	1	Q	TRUE	H	8	11	0	0.82168	0.2705	0	4.71111
7	DAB2	462	460	D	1	D	TRUE	A	10	11	0	0.7989	0.05644	-2	4
8	DAB2	493	491	S	1	S	TRUE	A	9	11	0	0.72188	-0.66726	0.7	3.2
9	DAB2	532	527	I	1	I	TRUE	V	8	11	0	0.7046	-0.82962	2.2	2.57778
10	DAB2	542	537	T	1	T	TRUE	S	9	11	0	0.77698	-0.14957	0.8	3
11	DAB2	548	543	M	1	M	TRUE	I	5	11	0	0.59565	-1.85338	1.2	2.82222
12	DAB2	560	555	T	1	T	TRUE	N	10	11	0	0.8762	0.78276	0	6
13	DAB2	566	561	G	1	G	TRUE	A	10	11	0	0.7989	0.05644	0	4
14	DAB2	570	565	T	1	T	TRUE	S	7	11	0	0.75837	-0.32444	0.4	1.86667
15	DAB2	579	574	S	1	S	TRUE	P	7	11	0	0.69788	-0.89277	-0.4	2.91111
16	DAB2	582	577	A	1	A	TRUE	S	9	11	0	0.77577	-0.16092	0.8	3
18	DAB2	623	613	P	1	P	TRUE	L	7	11	0	0.63613	-1.47303	-2.7	2.62222
20	DAB2	726	716	S	1	S	TRUE	A	8	11	0	0.64948	-1.34761	0.7	2.48889
21	DAB2	731	721	T	1	T	TRUE	A	4	11	0	0.53657	-2.40856	0.1	0.82222
22	DAB2	739	729	N	1	N	TRUE	D	10	11	0	0.85147	0.55043	1	6
23	DAB2	764	753	K	1	K	TRUE	A	4	11	0	0.61369	-1.68393	-1.2	1.28889
24	DAB2	765	754	C	1	C	TRUE	S	9	11	0	0.76662	-0.24688	-1	3.4
0	DCTN2	192	146	S	1	S	TRUE	A	9	11	0	0.7335	-0.0459	1	3.2
1	DCTN2	359	311	K	1	K	TRUE	-	10	11	0.90909	0.03283	-3.23279
2	DCTN2	360	312	V	1	V	TRUE	-	10	11	0.90909	0.03283	-3.23279
3	DCTN2	361	313	R	1	R	TRUE	-	10	11	0.90909	0.03283	-3.23279
4	DCTN2	389	341	S	1	S	TRUE	T	10	11	0	0.84502	0.46133	1	5
5	DCTN2	422	374	S	1	S	TRUE	T	7	11	0	0.72357	-0.09106	1	2.6
0	DDHD2	10	10	H	1	H	TRUE	Q	8	10	0	0.82545	0.20364	-0.22222	3.66667
2	DDHD2	142	141	R	1	R	TRUE	M	9	10	0	0.91875	1.00784	-1	5
3	DDHD2	461	453	Q	1	Q	TRUE	P	7	10	0	0.69901	-0.88614	-0.88889	3.72222
4	DDHD2	463	455	T	1	T	TRUE	P	6	10	0	0.73341	-0.58962	-0.88889	2.16667
5	DDHD2	468	460	A	1	A	TRUE	G	7	10	0	0.68563	-1.00153	0	2.44444
6	DDHD2	469	461	V	1	V	TRUE	A	5	10	0.2	0.58745	-1.84772	0.28571	1.66667
7	DDHD2	484	473	I	1	I	TRUE	-	4	10	0.4	0.4056	-3.41514	-1	1.9
8	DDHD2	639	627	L	1	L	TRUE	S	8	10	0	0.74784	-0.46529	-1.88889	3.33333
10	DDHD2	665	653	K	1	K	TRUE	M	8	10	0	0.81063	0.07588	-1.11111	4.33333
0	DDX1	313	307	V	1	V	TRUE	I	10	11	0	0.8304	-0.07748	3	4
125	DDX31	388	130	Q	1	Q	TRUE	R	7	9	0	0.81093	0.54187	0.5	3
126	DDX31	417	159	Q	1	Q	TRUE	E	8	9	0	0.8366	0.65586	2	5
127	DDX31	431	173	S	1	S	TRUE	T	8	9	0	0.84502	0.69328	1	5
128	DDX31	463	205	Q	1	Q	TRUE	K	4	9	0	0.64614	-0.18997	0.5	0.82143
129	DDX31	464	206	V	1	V	TRUE	A	8	9	0	0.7989	0.48845	0	4
130	DDX31	465	207	T	1	T	TRUE	V	4	9	0	0.65434	-0.15358	0.125	0.07143
131	DDX31	469	211	T	1	T	TRUE	S	4	9	0.22222	0.62598	-0.27953	0.33333	1.66667
132	DDX31	474	216	A	1	A	TRUE	G	3	9	0.22222	0.49432	-0.86423	0.16667	0.86667
133	DDX31	476	218	Q	1	Q	TRUE	E	4	9	0.22222	0.52804	-0.7145	1.66667	2.4
135	DDX31	491	233	A	1	A	TRUE	T	4	9	0	0.71798	0.12905	0	1.92857
136	DDX31	506	248	L	1	L	TRUE	I	8	9	0	0.8304	0.62833	2	4
137	DDX31	510	252	G	1	G	TRUE	C	8	9	0	0.91875	1.02072	-3	9
138	DDX31	512	254	L	1	L	TRUE	F	8	9	0	0.86927	0.80098	0	6
139	DDX31	514	256	Q	1	Q	TRUE	K	5	9	0	0.6686	-0.09023	1.125	2.85714
140	DDX31	541	283	N	1	N	TRUE	S	6	9	0	0.79052	0.4512	0	2.03571
141	DDX31	542	284	R	1	R	TRUE	S	3	9	0	0.60795	-0.35959	-1.125	0.28571
142	DDX31	543	285	L	1	L	TRUE	S	8	9	0	0.8366	0.65586	-2	4
143	DDX31	544	286	R	1	R	TRUE	G	8	9	0	0.78953	0.44685	-2	6
144	DDX31	556	298	P	1	P	TRUE	T	4	9	0	0.77321	0.37434	-2	0.64286
145	DDX31	559	301	A	1	A	TRUE	K	7	9	0	0.77158	0.36711	-1	4.25
148	DDX31	650	392	A	1	A	TRUE	S	8	9	0	0.8366	0.65586	1	4
149	DDX31	655	397	I	1	I	TRUE	V	8	9	0	0.81043	0.53963	3	4
150	DDX31	666	408	I	1	I	TRUE	V	8	9	0	0.81043	0.53963	3	4
151	DDX31	677	419	K	1	K	TRUE	R	5	9	0	0.69604	0.03164	1.25	1.82143
152	DDX31	679	421	-	1	-	TRUE	G	8	9	0.11111	0.78953	0.44685		6
153	DDX31	681	422	H	1	H	TRUE	Q	8	9	0	0.89297	0.90622	0	5
154	DDX31	766	507	A	1	A	TRUE	V	3	9	0	0.59937	-0.3977	-0.5	-0.46429
155	DDX31	777	518	G	1	G	TRUE	D	6	9	0	0.71734	0.12623	-1	2.5
156	DDX31	786	526	T	1	T	TRUE	K	8	9	0	0.8429	0.68384	-1	5
157	DDX31	794	531	Q	1	Q	TRUE	E	8	9	0	0.8366	0.65586	2	5
158	DDX31	807	544	-	1	-	TRUE	G	4	9	0.11111	0.57046	-0.52608		0.53571
159	DDX31	808	544	-	1	-	TRUE	G	3	9	0.11111	0.42634	-1.16617		-0.32143
160	DDX31	809	544	-	1	-	TRUE	A	5	9	0.11111	0.65729	-0.14046		1.35714
161	DDX31	810	544	-	1	-	TRUE	K	7	9	0.11111	0.78832	0.44145		4
162	DDX31	815	544	-	1	-	TRUE	N	5	9	0.11111	0.68467	-0.01886		2.46429
163	DDX31	816	544	S	1	S	TRUE	A	2	9	0	0.56167	-0.56512	0.25	0.39286
164	DDX31	820	548	Q	1	Q	TRUE	P	5	9	0	0.67356	-0.06823	-1	1.07143
165	DDX31	821	549	K	1	K	TRUE	G	3	9	0	0.56041	-0.57073	-0.375	0.17857
166	DDX31	823	551	K	1	K	TRUE	Q	3	9	0	0.58819	-0.44735	0.375	0.35714
167	DDX31	827	555	N	1	N	TRUE	A	3	9	0.22222	0.54711	-0.62982	-0.66667	0.33333
168	DDX31	828	556	L	1	L	TRUE	-	2	9	0.22222	0.4299	-1.15036	-2.33333	0.46667
0	DHX15	26	26	E	1	E	TRUE	D	6	7	0	0.85147	0.21163	2	6
0	DNAJB2	77	77	A	1	A	TRUE	G	10	11	0	0.78953	0.40731	0	6
1	DNAJB2	87	85	S	1	S	TRUE	A	7	11	0	0.70614	0.0719	1	2.2
2	DNAJB2	131	128	S	1	S	TRUE	N	9	11	0	0.76677	0.31576	0.9	4.8
3	DNAJB2	134	131	T	1	T	TRUE	S	7	11	0	0.75634	0.27382	0.4	1.86667
4	DNAJB2	264	246	E	1	E	TRUE	D	10	11	0	0.85147	0.65644	2	6
0	DSCAM	17	17	G	1	G	TRUE	S	5	7	0	0.75433	-1.19085	-0.33333	3
1	DSCAM	198	198	V	1	V	TRUE	I	6	7	0	0.8304	-0.06733	3	4
2	DSCAM	367	367	R	1	R	TRUE	H	6	7	0	0.91606	1.1978	0	8
3	DSCAM	391	391	E	1	E	TRUE	K	6	7	0	0.8429	0.11728	1	5
4	DSCAM	662	662	L	1	L	TRUE	M	6	7	0	0.91875	1.23757	2	5
5	DSCAM	1115	1115	D	1	D	TRUE	E	6	7	0	0.8366	0.02421	2	5
7	DSCAM	1587	1587	M	1	M	TRUE	L	6	7	0	0.77317	-0.91254	2	4
8	DSCAM	1604	1604	L	1	L	TRUE	V	6	7	0	0.81043	-0.36231	1	4
9	DSCAM	1941	1941	A	1	A	TRUE	T	6	7	0	0.84502	0.14866	0	5
10	DSCAM	1953	1953	A	1	A	TRUE	S	6	7	0	0.8366	0.02421	1	4
18	DSCAM	1962	1962	A	1	A	TRUE	S	6	7	0	0.8366	0.02421	1	4
6	DZIP1	275	200	Y	1	Y	TRUE	F	10	11	0	0.86927	0.81672	3	6
7	DZIP1	286	211	D	1	D	TRUE	E	10	11	0	0.8366	0.68214	2	5
8	DZIP1	370	278	A	1	A	TRUE	E	10	11	0	0.8366	0.68214	-1	5
9	DZIP1	488	396	T	1	T	TRUE	A	8	11	0	0.65155	-0.07998	-0.1	2.26667
10	DZIP1	523	431	N	1	N	TRUE	S	8	11	0	0.79001	0.49029	0.2	2.33333
11	DZIP1	536	444	S	1	S	TRUE	P	7	11	0.09091	0.67487	0.01608	-1.22222	3.02778
12	DZIP1	547	455	V	1	V	TRUE	A	5	11	0.09091	0.63323	-0.15541	0	1.94444
14	DZIP1	580	487	V	1	V	TRUE	I	10	11	0	0.8304	0.65662	3	4
15	DZIP1	609	514	K	1	K	TRUE	R	9	11	0	0.81035	0.57404	1.7	3.8
23	DZIP1	666	571	H	1	H	TRUE	E	7	11	0	0.77206	0.41635	0	3.6
24	DZIP1	681	586	E	1	E	TRUE	Q	10	11	0	0.89297	0.91432	2	5
25	DZIP1	698	603	G	1	G	TRUE	T	5	11	0	0.6315	-0.16257	-1.3	1.64444
26	DZIP1	701	606	F	1	F	TRUE	S	10	11	0	0.8366	0.68214	-2	4
27	DZIP1	708	610	P	1	P	TRUE	C	3	11	0	0.66373	-0.0298	-2.8	0.33333
28	DZIP1	710	612	I	1	I	TRUE	A	5	11	0	0.68114	0.04189	1	1.77778
29	DZIP1	725	627	V	1	V	TRUE	I	6	11	0	0.63821	-0.13491	1.8	1
30	DZIP1	733	635	I	1	I	TRUE	Q	6	11	0	0.70279	0.13106	-2.5	1.26667
31	DZIP1	741	643	Y	1	Y	TRUE	F	8	11	0	0.77156	0.4143	2	3.11111
32	DZIP1	747	649	P	1	P	TRUE	-	10	11	0.90909	0.03283	-2.62822
33	DZIP1	761	662	V	1	V	TRUE	F	9	11	0	0.79393	0.50644	-0.6	4.8
34	DZIP1	766	667	L	1	L	TRUE	S	7	11	0.09091	0.70552	0.1423	-2.22222	2.13889
35	DZIP1	768	669	V	1	V	TRUE	I	6	11	0	0.57526	-0.39417	1.9	1.24444
36	DZIP1	790	690	M	1	M	TRUE	A	3	11	0	0.40857	-1.0807	-0.3	0.06667
37	DZIP1	808	705	T	1	T	TRUE	S	8	11	0	0.71636	0.18696	0.4	2.62222
38	DZIP1	810	707	Y	1	Y	TRUE	F	8	11	0	0.69174	0.08555	2.2	3.57778
39	DZIP1	814	711	S	1	S	TRUE	T	5	11	0	0.63207	-0.16019	0.7	1.64444
41	DZIP1	860	735	V	1	V	TRUE	G	9	11	0	0.72373	0.21728	-2.9	4.4
42	DZIP1	876	751	Q	1	Q	TRUE	N	5	11	0	0.75056	0.32781	-0.2	1.64444
43	DZIP1	895	770	A	1	A	TRUE	K	8	11	0	0.75661	0.35274	-1	3.93333
45	DZIP1	900	775	Q	1	Q	TRUE	K	4	11	0	0.58036	-0.37319	-0.7	-0.11111
46	DZIP1	922	797	N	1	N	TRUE	K	6	11	0	0.66872	-0.00927	-0.6	1.33333
47	DZIP1	929	804	V	1	V	TRUE	G	9	11	0	0.71967	0.20057	-2.9	4.4
48	DZIP1	932	807	W	1	W	TRUE	Q	7	11	0.18182	0.65271	-0.07519	-2.25	3.5
49	DZIP1	939	813	L	1	L	TRUE	V	5	11	0	0.52258	-0.61117	0.5	1.11111
50	DZIP1	955	829	S	1	S	TRUE	A	2	11	0	0.43258	-0.98182	-0.9	-0.71111
51	DZIP1	956	830	K	1	K	TRUE	N	9	11	0	0.78012	0.44953	-0.1	4.4
52	DZIP1	960	834	S	1	S	TRUE	P	7	11	0	0.7093	0.15785	-1	1.91111
53	DZIP1	962	836	T	1	T	TRUE	G	7	11	0	0.69361	0.09324	-1.7	2.2
58	DZIP1	979	852	I	1	I	TRUE	V	9	11	0	0.70844	0.15433	2.9	3.4
59	DZIP1	981	854	M	1	M	TRUE	V	10	11	0	0.81042	0.57436	1	4
60	DZIP1	985	858	G	1	G	TRUE	S	9	11	0.09091	0.72701	0.23079	0	4
61	DZIP1	987	860	P	1	P	TRUE	S	5	11	0.09091	0.48903	-0.74934	-1.11111	1.36111
62	DZIP1	989	862	R	1	R	TRUE	D	9	11	0.09091	0.73993	0.28403	-2	6
63	DZIP1	990	863	M	1	M	TRUE	V	10	11	0	0.81042	0.57436	1	4
64	DZIP1	991	864	E	1	E	TRUE	-	9	11	0.81818	0.11374	-2.295	-3
65	DZIP1	993	866	I	1	I	TRUE	-	9	11	0.81818	0.10115	-2.34684	2
66	DZIP1	994	867	K	1	K	TRUE	-	9	11	0.81818	0.11684	-2.28222	-2
67	DZIP1	996	869	Q	1	Q	TRUE	-	9	11	0.81818	0.11684	-2.28222	-1
68	DZIP1	998	871	S	1	S	TRUE	-	9	11	0.81818	0.10865	-2.31597	-2
69	DZIP1	1000	873	C	1	C	TRUE	-	9	11	0.81818	0.10115	-2.34684	-1
70	DZIP1	1001	874	D	1	D	TRUE	-	9	11	0.81818	0.12022	-2.26831	-3
0	ECHS1	3	3	S	1	S	TRUE	A	7	10	0	0.71229	-1.01398	1	2.47222
1	ECHS1	7	7	V	1	V	TRUE	L	9	10	0	0.77317	-0.26804	1	4
2	ECHS1	9	9	L	1	L	TRUE	P	5	10	0	0.72303	-0.88236	-2.66667	1.5
3	ECHS1	10	10	G	1	G	TRUE	R	4	10	0	0.69364	-1.24246	-2.11111	-0.11111
4	ECHS1	13	13	H	1	H	TRUE	A	4	10	0	0.49889	-3.62878	-1.33333	0.5
5	ECHS1	14	14	Q	1	Q	TRUE	P	6	10	0	0.76424	-0.37747	-0.66667	2.75
6	ECHS1	16	16	Q	1	Q	TRUE	R	6	10	0	0.70909	-1.05327	0	1.41667
7	ECHS1	67	67	K	1	K	TRUE	E	3	10	0	0.42406	-4.5456	-0.55556	-0.25
8	ECHS1	81	81	T	1	T	TRUE	A	9	10	0	0.7989	0.04722	0	4
9	ECHS1	286	286	S	1	S	TRUE	N	7	10	0	0.7332	-0.75774	0.88889	3.66667
0	EEF1D	73	30	R	1	R	TRUE	H	3	7	0	0.71715	-0.02337	-0.5	1.26667
1	EEF1D	98	44	T	1	T	TRUE	A	5	7	0	0.72142	-0.00388	-0.16667	2
2	EEF1D	99	45	Q	1	Q	TRUE	E	6	7	0	0.8366	0.52184	2	5
3	EEF1D	122	61	S	1	S	TRUE	D	2	7	0	0.61978	-0.46782	0	0.86667
5	EEF1D	132	71	S	1	S	TRUE	R	3	7	0	0.63977	-0.37659	-0.5	0.06667
6	EEF1D	140	79	R	1	R	TRUE	-	3	7	0.42857	0.40813	-1.43393	0.33333	2.66667
7	EEF1D	161	100	V	1	V	TRUE	A	6	7	0	0.7989	0.34978	0	4
8	EEF1D	201	140	L	1	L	TRUE	P	4	7	0	0.73664	0.06556	-2.83333	1.93333
9	EEF1D	242	181	Q	1	Q	TRUE	W	6	7	0	0.94756	1.02834	-2	11
10	EEF1D	245	184	T	1	T	TRUE	A	5	7	0	0.71427	-0.03651	0.16667	3
11	EEF1D	249	188	T	1	T	TRUE	A	6	7	0	0.7989	0.34978	0	4
12	EEF1D	254	193	C	1	C	TRUE	G	3	7	0	0.67896	-0.19772	-3	0.53333
13	EEF1D	261	200	A	1	A	TRUE	T	5	7	0	0.7597	0.17082	0.16667	3.66667
15	EEF1D	265	204	L	1	L	TRUE	A	3	7	0.14286	0.51827	-0.93118	-1	0.7
16	EEF1D	269	208	S	1	S	TRUE	D	5	7	0.14286	0.71518	-0.03238	0	6
17	EEF1D	303	241	Q	1	Q	TRUE	R	6	7	0	0.85365	0.59967	1	5
18	EEF1D	348	286	P	1	P	TRUE	A	2	7	0	0.57212	-0.6854	-1.5	-0.13333
19	EEF1D	357	295	L	1	L	TRUE	R	4	7	0	0.75258	0.13832	-2	3.4
20	EEF1D	386	324	S	1	S	TRUE	A	3	7	0	0.70768	-0.06661	1	1.8
21	EEF1D	415	353	T	1	T	TRUE	P	6	7	0	0.87156	0.68145	-1	7
22	EEF1D	506	435	A	1	A	TRUE	-	4	7	0.57143	0.26839	-2.07179	0	4
23	EEF1D	507	436	V	1	V	TRUE	-	4	7	0.57143	0.30427	-1.90799	1	5
24	EEF1D	510	439	G	1	G	TRUE	-	4	7	0.57143	0.29017	-1.97233	0	6
25	EEF1D	511	440	P	1	P	TRUE	-	4	7	0.57143	0.27706	-2.03222	-1	4
26	EEF1D	516	445	S	1	S	TRUE	-	4	7	0.57143	0.26147	-2.10338	0	6
27	EEF1D	519	448	A	1	A	TRUE	-	4	7	0.57143	0.27985	-2.01947	0	5
28	EEF1D	530	459	G	1	G	TRUE	S	6	7	0	0.8366	0.52184	0	4
29	EEF1D	540	469	A	1	A	TRUE	V	4	7	0	0.70684	-0.07044	-0.33333	3.46667
30	EEF1D	555	484	S	1	S	TRUE	G	6	7	0	0.78953	0.30702	0	6
31	EEF1D	565	494	A	1	A	TRUE	S	6	7	0	0.8366	0.52184	1	4
32	EEF1D	566	495	R	1	R	TRUE	K	6	7	0	0.8429	0.5506	2	5
33	EEF1D	573	502	M	1	M	TRUE	A	3	7	0	0.54976	-0.78746	-0.66667	0.93333
34	EEF1D	622	551	G	1	G	TRUE	-	3	7	0.42857	0.41256	-1.41369	-1	6
35	EEF1D	650	579	L	1	L	TRUE	A	3	7	0	0.6184	-0.47414	-0.66667	1.13333
36	EEF1D	691	620	Q	1	Q	TRUE	K	6	7	0	0.8429	0.5506	1	5
37	EEF1D	703	632	R	1	R	TRUE	Q	6	7	0	0.89297	0.77916	1	5
38	EEF1D	721	650	Q	1	Q	TRUE	E	6	7	0	0.8366	0.52184	2	5
0	EHMT1	57	19	V	1	V	TRUE	A	5	9	0	0.70558	-0.86676	0	1.96429
1	EHMT1	65	27	S	1	S	TRUE	P	4	9	0	0.74891	-0.4513	-1	1.21429
2	EHMT1	79	41	C	1	C	TRUE	S	8	9	0	0.8366	0.38955	-1	4
3	EHMT1	80	42	-	1	-	TRUE	D	6	9	0.11111	0.72743	-0.6573		3
4	EHMT1	82	43	T	1	T	TRUE	S	4	9	0	0.57483	-2.12053	-0.25	0.10714
5	EHMT1	89	50	R	1	R	TRUE	K	8	9	0	0.8429	0.44998	2	5
6	EHMT1	106	67	A	1	A	TRUE	L	4	9	0	0.57163	-2.15129	-0.5	0.82143
7	EHMT1	118	79	E	1	E	TRUE	D	8	9	0	0.85147	0.5322	2	6
8	EHMT1	148	109	S	1	S	TRUE	P	6	9	0	0.74787	-0.46127	-0.5	3.46429
9	EHMT1	176	137	A	1	A	TRUE	G	8	9	0	0.78953	-0.06173	0	6
10	EHMT1	263	220	V	1	V	TRUE	I	5	9	0	0.69936	-0.92643	1.875	1.32143
11	EHMT1	280	237	P	1	P	TRUE	Q	8	9	0	0.89297	0.93012	-1	5
12	EHMT1	285	242	S	1	S	TRUE	N	8	9	0	0.8762	0.76929	1	6
13	EHMT1	358	315	N	1	N	TRUE	A	4	9	0	0.70004	-0.91991	-0.5	2.28571
15	EHMT1	394	351	P	1	P	TRUE	T	7	9	0	0.78927	-0.0643	-1	3.5
16	EHMT1	403	360	N	1	N	TRUE	S	7	9	0	0.73923	-0.54415	0.875	3
17	EHMT1	411	368	P	1	P	TRUE	Q	5	9	0	0.69824	-0.93722	-1.125	1.67857
18	EHMT1	456	413	E	1	E	TRUE	D	8	9	0	0.85147	0.5322	2	6
19	EHMT1	482	439	V	1	V	TRUE	A	6	9	0	0.7069	-0.85409	-0.5	2.71429
20	EHMT1	485	442	P	1	P	TRUE	S	8	9	0	0.8366	0.38955	-1	4
21	EHMT1	490	447	S	1	S	TRUE	A	3	9	0	0.59366	-1.93996	0.125	0.5
22	EHMT1	521	478	S	1	S	TRUE	A	4	9	0	0.70701	-0.85304	1	1.92857
25	EHMT1	687	642	T	1	T	TRUE	A	5	9	0	0.58658	-2.0079	-0.25	1.28571
26	EHMT1	799	754	C	1	C	TRUE	S	8	9	0	0.8366	0.38955	-1	4
27	EHMT1	1006	961	D	1	D	TRUE	N	7	9	0	0.79678	0.00772	0.875	4.75
28	EHMT1	1302	1257	S	1	S	TRUE	A	6	9	0.11111	0.62766	-1.61399	1	2.85714
0	EID1	37	37	N	1	N	TRUE	S	7	9	0	0.73862	-0.25805	0.625	3.25
1	EID1	61	61	A	1	A	TRUE	E	8	9	0	0.8366	0.57509	-1	5
2	EID1	74	71	K	1	K	TRUE	Q	3	9	0	0.59719	-1.46065	0.625	0.96429
39	EIF4B	557	484	T	1	T	TRUE	A	4	10	0	0.51291	-1.74225	-0.22222	0.88889
40	EIF4B	563	488	D	1	D	TRUE	E	7	10	0	0.68124	-0.68658	1.55556	2.52778
41	EIF4B	566	491	I	1	I	TRUE	V	9	10	0	0.81043	0.12356	3	4
42	EIF4B	599	524	E	1	E	TRUE	D	9	10	0	0.85147	0.38098	2	6
0	EMC2	116	107	V	1	V	TRUE	I	7	8	0	0.8304	0.09346	3	4
0	EMP3	48	48	G	1	G	TRUE	D	6	10	0	0.6715	-2.17905	-1.11111	1.97222
0	ENKUR	385	8	T	1	T	TRUE	S	9	11	0	0.69895	0.24217	0.7	3.2
1	ENKUR	406	29	K	1	K	TRUE	I	3	11	0	0.61242	-0.64641	-1.8	0.84444
2	ENKUR	420	43	I	1	I	TRUE	F	5	11	0.09091	0.12578	-5.64342	-0.22222	1.33333
3	ENKUR	441	59	T	1	T	TRUE	S	10	11	0	0.8366	1.65557	1	4
4	ENKUR	481	83	Q	1	Q	TRUE	E	4	11	0.09091	0.13558	-5.54279	0.66667	0.91667
5	ENKUR	489	88	T	1	T	TRUE	P	5	11	0	0.74082	0.67206	-0.6	1.44444
6	ENKUR	746	250	T	1	T	TRUE	I	7	11	0	0.68996	0.1498	-0.8	2.33333
0	ENO1	25	25	C	1	C	TRUE	F	3	6	0	0.7583	-1.34279	-2.2	2.6
1	ENO1	176	176	G	1	G	TRUE	A	2	6	0	0.6201	-4.08377	-0.8	0.7
2	ENO1	177	177	C	1	C	TRUE	N	3	6	0	0.6945	-2.60813	-2.2	2.2
3	ENO1	179	179	K	1	K	TRUE	R	5	6	0	0.85365	0.54812	2	5
4	ENO1	302	302	K	1	K	TRUE	G	3	6	0	0.69155	-2.66665	-0.8	1.1
5	ENO1	309	309	E	1	E	TRUE	A	4	6	0	0.68786	-2.73995	-1.2	2.4
6	ENO1	419	419	D	1	D	TRUE	S	5	6	0	0.8366	0.20994	0	4
7	ENO1	427	427	K	1	K	TRUE	N	3	6	0	0.76337	-1.24224	0	2.8
0	ERLEC1	307	291	H	1	H	TRUE	N	8	10	0	0.80444	0.20897	0.77778	4.88889
1	ERLEC1	410	394	I	1	I	TRUE	T	9	10	0	0.84502	0.39401	-1	5
108	FAM45A	304	158	S	1	S	TRUE	A	9	10	0	0.7989	0.29383	1	4
109	FAM45A	392	246	L	1	L	TRUE	I	6	10	0	0.65146	-0.49286	1.44444	2.61111
1	FBXO32	343	343	P	1	P	TRUE	S	9	10	0	0.8366	0.00362	-1	4
75	FGFR1OP	205	205	G	1	G	TRUE	S	5	10	0	0.68017	-0.04048	-0.44444	1.97222
76	FGFR1OP	225	225	R	1	R	TRUE	K	9	10	0	0.84288	0.57209	2	5
77	FGFR1OP	230	230	G	1	G	TRUE	T	7	10	0	0.74966	0.22114	-1.55556	3.41667
78	FGFR1OP	272	272	A	1	A	TRUE	P	6	10	0	0.67109	-0.07467	-0.55556	2.08333
79	FGFR1OP	281	281	V	1	V	TRUE	L	9	10	0	0.77315	0.30958	1	4
80	FGFR1OP	284	284	D	1	D	TRUE	E	9	10	0	0.83657	0.54836	2	5
81	FGFR1OP	285	285	N	1	N	TRUE	T	7	10	0	0.67592	-0.05647	-0.11111	3.13889
82	FGFR1OP	294	294	A	1	A	TRUE	R	3	10	0	0.57228	-0.44666	-0.77778	0.91667
83	FGFR1OP	296	296	S	1	S	TRUE	L	6	10	0	0.58243	-0.40843	-1.66667	1.94444
84	FGFR1OP	301	301	T	1	T	TRUE	K	6	10	0	0.64529	-0.17179	-1	1.58333
85	FGFR1OP	325	325	D	1	D	TRUE	E	9	10	0	0.83657	0.54836	2	5
86	FGFR1OP	399	399	L	1	L	TRUE	V	6	10	0	0.68594	-0.01874	0.33333	2
87	FGFR1OP	407	407	R	1	R	TRUE	H	9	10	0	0.91604	0.84752	0	8
88	FGFR1OP	428	428	G	1	G	TRUE	I	5	10	0	0.67993	-0.04138	-3.55556	2.58333
0	FH	4	4	T	1	T	TRUE	A	10	11	0	0.7989	0.0986	0	4
1	FH	12	12	S	1	S	TRUE	R	9	11	0	0.76895	-0.10304	-0.9	3.6
2	FH	17	17	D	1	D	TRUE	A	5	11	0	0.62365	-1.08131	-1.7	0.44444
4	FH	43	37	L	1	L	TRUE	P	9	11	0	0.80036	0.10843	-2.9	5.4
5	FH	223	217	N	1	N	TRUE	D	5	11	0	0.66313	-0.81552	0.7	2.42222
6	FH	447	441	D	1	D	TRUE	E	10	11	0	0.8366	0.3524	2	5
7	FH	483	476	K	1	K	TRUE	N	9	11	0	0.79036	0.04113	0	5
0	FIP1L1	227	226	M	1	M	TRUE	I	6	7	0	0.8304	-0.10513	1	4
0	GABRA2	10	3	A	1	A	TRUE	T	3	6	0	0.71728	-1.05903	-0.4	0.8
1	GABRA2	13	6	D	1	D	TRUE	N	4	6	0	0.78608	-0.30522	0.8	4
2	GABRA2	370	363	I	1	I	TRUE	T	4	6	0.16667	0.69526	-1.30035	-1	5
3	GABRA2	391	384	V	1	V	TRUE	I	4	6	0.16667	0.68323	-1.43219	3	4
4	GABRA2	419	412	Y	1	Y	TRUE	S	4	6	0.16667	0.68833	-1.37632	-2	4
0	GCAT	6	6	F	1	F	TRUE	V	3	10	0	0.49193	-0.68182	-0.77778	1.22222
1	GCAT	16	16	C	1	C	TRUE	R	5	10	0	0.66321	-0.03002	-3	0.47222
2	GCAT	20	20	S	1	S	TRUE	A	7	10	0	0.67998	0.03378	0.77778	2.11111
3	GCAT	24	24	V	1	V	TRUE	L	9	10	0	0.77317	0.38843	1	4
4	GCAT	40	40	A	1	A	TRUE	G	8	10	0	0.72384	0.20071	-0.11111	4.22222
5	GCAT	49	49	I	1	I	TRUE	V	9	10	0	0.81043	0.5302	3	4
6	GCAT	140	114	S	1	S	TRUE	D	5	10	0	0.77239	0.38545	0.44444	3.22222
8	GCAT	347	259	V	1	V	TRUE	I	9	10	0	0.8304	0.60621	3	4
9	GCAT	456	332	T	1	T	TRUE	S	8	10	0	0.77491	0.39503	0.77778	2.88889
10	GCAT	540	416	K	1	K	TRUE	G	9	10	0	0.78953	0.4507	-2	6
0	GDI2	61	61	P	1	P	TRUE	A	3	9	0	0.65128	-3.93855	-1	1.14286
1	GDI2	64	64	T	1	T	TRUE	A	5	9	0	0.63198	-4.35353	-0.125	1.42857
2	GDI2	174	174	R	1	R	TRUE	K	8	9	0	0.8429	0.18163	2	5
3	GDI2	261	261	H	1	H	TRUE	Q	8	9	0	0.89297	1.25826	0	5
4	GDI2	394	394	R	1	R	TRUE	T	7	9	0	0.7691	-1.4051	-0.625	3.5
1	GEN1	120	100	A	1	A	TRUE	T	5	11	0	0.68791	-0.30131	0.3	1.97778
2	GEN1	146	126	V	1	V	TRUE	I	8	11	0	0.78452	0.29471	2.6	2.95556
3	GEN1	161	141	H	1	H	TRUE	Y	9	11	0	0.82775	0.56139	1.7	6.2
4	GEN1	167	147	Q	1	Q	TRUE	H	4	11	0	0.72923	-0.04638	-0.6	2.02222
5	GEN1	192	172	I	1	I	TRUE	M	10	11	0	0.91875	1.12278	1	5
6	GEN1	193	173	S	1	S	TRUE	N	10	11	0	0.8762	0.86026	1	6
7	GEN1	199	179	I	1	I	TRUE	V	10	11	0	0.81043	0.45451	3	4
9	GEN1	269	249	A	1	A	TRUE	N	5	11	0	0.60953	-0.78485	-1	0.86667
10	GEN1	270	250	V	1	V	TRUE	P	7	11	0	0.76706	0.18696	-2	3.06667
11	GEN1	285	265	C	1	C	TRUE	S	10	11	0	0.8366	0.61596	-1	4
13	GEN1	338	318	R	1	R	TRUE	K	10	11	0	0.8429	0.65483	2	5
14	GEN1	357	337	V	1	V	TRUE	L	8	11	0	0.64225	-0.58301	0.5	2.08889
15	GEN1	389	369	P	1	P	TRUE	H	9	11	0	0.83716	0.61942	-1.9	6.2
16	GEN1	405	385	K	1	K	TRUE	I	6	11	0	0.73112	-0.03476	-2.2	1.46667
17	GEN1	415	395	K	1	K	TRUE	N	10	11	0	0.8762	0.86026	0	6
18	GEN1	435	415	Q	1	Q	TRUE	E	10	11	0	0.8366	0.61596	2	5
19	GEN1	446	426	L	1	L	TRUE	M	3	11	0	0.61115	-0.77485	0.9	1.04444
20	GEN1	448	428	E	1	E	TRUE	D	10	11	0	0.85147	0.70773	2	6
21	GEN1	449	429	Q	1	Q	TRUE	-	5	11	0.45455	0.31897	-2.57735	0	0.4
22	GEN1	455	435	L	1	L	TRUE	A	5	11	0	0.55392	-1.12794	-0.8	0.71111
23	GEN1	466	446	T	1	T	TRUE	E	9	11	0	0.76638	0.18276	-1	4.4
24	GEN1	475	455	D	1	D	TRUE	I	5	11	0	0.70386	-0.20294	-3	3.44444
25	GEN1	488	468	P	1	P	TRUE	-	10	11	0.90909	0.03283	-4.3426
26	GEN1	489	469	K	1	K	TRUE	Q	10	11	0	0.89297	0.96373	1	5
27	GEN1	491	471	N	1	N	TRUE	S	7	11	0.18182	0.61538	-0.74878	0.875	3
28	GEN1	503	481	S	1	S	TRUE	L	10	11	0	0.77317	0.22468	-2	4
29	GEN1	515	493	F	1	F	TRUE	H	7	11	0	0.70682	-0.18468	-1	2.75556
30	GEN1	516	494	K	1	K	TRUE	M	9	11	0	0.83947	0.6337	-1.2	4.2
31	GEN1	519	497	N	1	N	TRUE	K	9	11	0	0.76846	0.19564	0	4.2
32	GEN1	526	504	L	1	L	TRUE	P	5	11	0	0.7214	-0.09468	-2.7	1.08889
33	GEN1	530	508	A	1	A	TRUE	S	7	11	0	0.72241	-0.08849	0.5	1.42222
34	GEN1	550	528	L	1	L	TRUE	S	9	11	0	0.77528	0.23766	-2.1	3
35	GEN1	551	529	S	1	S	TRUE	L	10	11	0	0.77317	0.22468	-2	4
36	GEN1	553	531	G	1	G	TRUE	S	5	11	0	0.52851	-1.28469	-0.7	0.42222
37	GEN1	562	540	Y	1	Y	TRUE	C	8	11	0	0.78075	0.27146	-1.7	4.48889
38	GEN1	564	542	S	1	S	TRUE	N	7	11	0	0.71581	-0.12922	0.9	3.02222
39	GEN1	569	547	-	1	-	TRUE	L	6	11	0.09091	0.63184	-0.6472		1.33333
40	GEN1	573	550	S	1	S	TRUE	P	6	11	0	0.65255	-0.51943	-1.1	1.2
41	GEN1	580	557	D	1	D	TRUE	Q	9	11	0	0.84889	0.69182	-0.1	4
44	GEN1	600	577	Y	1	Y	TRUE	H	9	11	0	0.8601	0.76093	1.7	6.4
45	GEN1	617	594	D	1	D	TRUE	G	9	11	0	0.72388	-0.07943	-0.9	4.8
46	GEN1	628	601	S	1	S	TRUE	P	10	11	0	0.87156	0.83168	-1	7
47	GEN1	632	605	I	1	I	TRUE	R	10	11	0	0.85365	0.72115	-3	5
48	GEN1	634	607	P	1	P	TRUE	T	9	11	0	0.76324	0.16338	-1	4
49	GEN1	638	611	V	1	V	TRUE	G	7	11	0	0.70342	-0.20565	-3	2.73333
50	GEN1	640	613	Q	1	Q	TRUE	-	10	11	0.90909	0.03283	-4.3426
51	GEN1	647	620	D	1	D	TRUE	-	7	11	0.63636	0.23282	-3.10882	2	5
53	GEN1	656	629	G	1	G	TRUE	K	5	11	0.18182	0.57371	-1.00585	-2	2.85714
56	GEN1	678	651	H	1	H	TRUE	D	5	11	0	0.64588	-0.56059	-1.1	0.71111
57	GEN1	679	652	G	1	G	TRUE	W	5	11	0	0.71231	-0.15079	-2	1.24444
58	GEN1	680	653	N	1	N	TRUE	D	8	11	0	0.68683	-0.30797	0.8	3.33333
59	GEN1	706	679	K	1	K	TRUE	E	10	11	0	0.8366	0.61596	1	5
60	GEN1	723	696	I	1	I	TRUE	V	8	11	0	0.69893	-0.23331	2.2	2.57778
61	GEN1	724	697	H	1	H	TRUE	D	5	11	0	0.66329	-0.45323	-0.6	1.97778
62	GEN1	728	701	V	1	V	TRUE	L	9	11	0	0.71357	-0.143	0.8	3.2
63	GEN1	731	704	T	1	T	TRUE	L	7	11	0.18182	0.53836	-1.22394	-1	3.5
64	GEN1	733	706	D	1	D	TRUE	V	7	11	0	0.67281	-0.39445	-3.1	2.53333
65	GEN1	739	712	D	1	D	TRUE	A	10	11	0	0.7989	0.38341	-2	4
66	GEN1	747	720	L	1	L	TRUE	S	8	11	0	0.76389	0.16745	-2.2	2.28889
67	GEN1	755	728	E	1	E	TRUE	G	10	11	0	0.78953	0.32562	-2	6
68	GEN1	764	737	K	1	K	TRUE	N	7	11	0	0.72682	-0.0613	-0.2	3.4
69	GEN1	766	739	H	1	H	TRUE	K	9	11	0	0.76811	0.19345	-0.9	4.2
70	GEN1	767	740	F	1	F	TRUE	V	7	11	0	0.70974	-0.16667	-0.7	3.53333
71	GEN1	774	747	H	1	H	TRUE	F	5	11	0	0.70611	-0.18903	-2	2.22222
72	GEN1	781	754	S	1	S	TRUE	N	9	11	0	0.80332	0.41069	1	4.8
73	GEN1	797	770	D	1	D	TRUE	S	5	11	0	0.67451	-0.38399	0.2	2.06667
74	GEN1	798	771	I	1	I	TRUE	V	7	11	0	0.62672	-0.67879	2.5	2.11111
75	GEN1	800	773	I	1	I	TRUE	T	3	11	0	0.49917	-1.46567	-0.5	-0.11111
76	GEN1	803	776	L	1	L	TRUE	P	10	11	0	0.87156	0.83168	-3	7
77	GEN1	804	777	H	1	H	TRUE	N	7	11	0	0.68493	-0.31967	0	2.4
78	GEN1	805	778	P	1	P	TRUE	A	5	11	0	0.70561	-0.19214	-1	2
79	GEN1	813	786	I	1	I	TRUE	V	7	11	0	0.68984	-0.2894	1.8	2.13333
80	GEN1	815	788	R	1	R	TRUE	V	6	11	0	0.63144	-0.6497	-2.4	2.08889
81	GEN1	817	790	R	1	R	TRUE	T	5	11	0.09091	0.51502	-1.36792	-1.44444	1.22222
82	GEN1	828	801	F	1	F	TRUE	C	10	11	0	0.91875	1.12278	-2	9
83	GEN1	829	802	F	1	F	TRUE	L	10	11	0	0.77317	0.22468	0	4
84	GEN1	841	814	T	1	T	TRUE	V	4	11	0	0.4658	-1.67155	-0.6	-0.22222
85	GEN1	847	820	C	1	C	TRUE	Y	6	11	0	0.74292	0.03803	-1.8	2
86	GEN1	853	826	S	1	S	TRUE	K	10	11	0	0.8429	0.65483	0	5
87	GEN1	854	827	Y	1	Y	TRUE	H	6	11	0	0.83877	0.62935	0.8	3.33333
88	GEN1	866	839	G	1	G	TRUE	K	5	11	0	0.66101	-0.46725	-1.8	1.95556
89	GEN1	867	840	H	1	H	TRUE	N	5	11	0	0.69609	-0.25087	0.1	2.22222
90	GEN1	868	841	N	1	N	TRUE	D	6	11	0	0.65528	-0.50264	0.6	1.53333
91	GEN1	870	843	S	1	S	TRUE	N	9	11	0	0.8108	0.45682	0.9	4.8
92	GEN1	879	852	V	1	V	TRUE	I	7	11	0	0.67874	-0.3579	1.4	0.91111
93	GEN1	885	858	F	1	F	TRUE	C	8	11	0	0.77715	0.24924	-1.6	4.64444
94	GEN1	887	860	K	1	K	TRUE	Q	5	11	0	0.70426	-0.20045	1.2	2.44444
95	GEN1	897	870	K	1	K	TRUE	N	6	11	0	0.67667	-0.37066	-0.2	2
96	GEN1	900	873	L	1	L	TRUE	P	7	11	0.09091	0.69927	-0.23124	-2.77778	3.80556
98	GEN1	909	882	C	1	C	TRUE	F	6	11	0	0.67722	-0.36728	-1.6	1.33333
99	GEN1	912	885	S	1	S	TRUE	C	8	11	0	0.80707	0.43382	-0.9	4.66667
100	GEN1	917	890	R	1	R	TRUE	D	4	11	0	0.68018	-0.349	-0.8	2.48889
101	GEN1	919	891	E	1	E	TRUE	D	6	11	0	0.73422	-0.01563	1.2	2.73333
102	GEN1	936	908	V	1	V	TRUE	L	9	11	0	0.70656	-0.18623	0.6	2.8
0	GHITM	6	6	F	1	F	TRUE	L	10	11	0	0.77317	-0.48591	0	4
1	GHITM	52	51	T	1	T	TRUE	I	9	11	0	0.76759	-0.55858	-1.1	3.2
2	GHITM	65	64	D	1	D	TRUE	E	10	11	0	0.8366	0.33945	2	5
3	GHITM	72	71	A	1	A	TRUE	M	5	11	0	0.6881	-1.59294	-0.6	2.4
4	GHITM	106	105	S	1	S	TRUE	N	10	11	0	0.8762	0.85478	1	6
5	GHITM	140	139	T	1	T	TRUE	A	10	11	0	0.7989	-0.15108	0	4
6	GHITM	306	305	I	1	I	TRUE	V	4	11	0	0.55738	-3.29408	0.4	0.77778
7	GHITM	311	310	F	1	F	TRUE	V	6	11	0	0.61751	-2.51153	-1.2	1.93333
0	GLE1	43	35	A	1	A	TRUE	V	9	11	0.09091	0.7117	-0.37992	0	4
1	GLE1	48	40	V	1	V	TRUE	M	10	11	0	0.91875	1.01151	1	5
2	GLE1	71	59	Y	1	Y	TRUE	H	9	11	0	0.86556	0.65406	1.7	6.4
3	GLE1	72	60	K	1	K	TRUE	T	5	11	0	0.7089	-0.3987	-1.4	1.11111
4	GLE1	77	65	V	1	V	TRUE	P	10	11	0	0.87156	0.69441	-2	7
5	GLE1	81	69	A	1	A	TRUE	T	7	11	0	0.68824	-0.53758	-0.4	2.33333
7	GLE1	83	71	L	1	L	TRUE	P	5	11	0	0.67005	-0.65983	-2	1.53333
8	GLE1	96	84	V	1	V	TRUE	F	5	11	0	0.64409	-0.83424	-0.9	0.75556
9	GLE1	103	91	G	1	G	TRUE	R	8	11	0	0.69673	-0.4805	-1.8	2.75556
10	GLE1	107	95	L	1	L	TRUE	F	7	11	0	0.75714	-0.07456	-0.5	2.4
11	GLE1	109	97	T	1	T	TRUE	P	8	11	0	0.77865	0.06998	-0.6	4.08889
12	GLE1	111	99	L	1	L	TRUE	S	9	11	0	0.77373	0.03693	-2.1	3
13	GLE1	118	106	A	1	A	TRUE	T	9	11	0	0.76265	-0.03752	0	4
14	GLE1	122	110	Q	1	Q	TRUE	H	5	11	0	0.64228	-0.8464	-0.1	1.26667
15	GLE1	139	127	R	1	R	TRUE	K	9	11	0	0.79129	0.15496	1.9	4.2
16	GLE1	338	323	R	1	R	TRUE	S	5	11	0	0.56942	-1.33606	-1.2	0.73333
17	GLE1	365	350	A	1	A	TRUE	E	10	11	0	0.8366	0.45942	-1	5
18	GLE1	368	353	T	1	T	TRUE	M	7	11	0	0.74468	-0.15831	-0.8	2.44444
20	GLE1	382	367	T	1	T	TRUE	S	8	11	0	0.76826	0.0002	0.8	2.97778
21	GLE1	389	374	R	1	R	TRUE	Q	8	11	0	0.81881	0.33991	0.4	2.91111
22	GLE1	535	511	A	1	A	TRUE	E	8	11	0	0.79071	0.15104	-1	2.51111
23	GLE1	614	590	Q	1	Q	TRUE	R	10	11	0	0.85365	0.57401	1	5
0	GNPDA1	66	37	M	1	M	TRUE	L	10	11	0	0.77317	-0.00834	2	4
1	GNPDA1	152	123	Q	1	Q	TRUE	E	10	11	0	0.8366	0.32187	2	5
2	GNPDA1	263	234	C	1	C	TRUE	R	10	11	0	0.85365	0.41064	-3	5
0	GORASP2	141	141	M	1	M	TRUE	T	8	9	0	0.84502	0.43188	-1	5
1	GORASP2	283	283	S	1	S	TRUE	P	8	9	0	0.87156	0.67753	-1	7
2	GORASP2	331	328	L	1	L	TRUE	I	6	9	0	0.71792	-0.74445	1.75	3.57143
3	GORASP2	350	347	T	1	T	TRUE	S	8	9	0	0.8366	0.35389	1	4
4	GORASP2	354	351	Q	1	Q	TRUE	R	8	9	0	0.85365	0.5117	1	5
5	GORASP2	363	360	R	1	R	TRUE	P	8	9	0	0.87156	0.67753	-2	7
6	GORASP2	375	372	A	1	A	TRUE	V	8	9	0	0.81043	0.11168	0	4
7	GORASP2	381	378	V	1	V	TRUE	A	7	9	0	0.72559	-0.67345	0	3
8	GORASP2	396	393	I	1	I	TRUE	S	3	9	0.22222	0.51199	-2.65042	-2.5	1.73333
9	GORASP2	398	395	S	1	S	TRUE	P	8	9	0	0.87156	0.67753	-1	7
10	GORASP2	412	409	P	1	P	TRUE	S	7	9	0	0.74476	-0.49607	-1	3.25
11	GORASP2	418	415	A	1	A	TRUE	V	7	9	0	0.71638	-0.7587	0	2.25
12	GORASP2	426	423	L	1	L	TRUE	P	7	9	0	0.79161	-0.06247	-2.875	5
13	GORASP2	427	424	V	1	V	TRUE	T	6	9	0	0.68826	-1.01901	-0.25	2.42857
14	GORASP2	433	430	I	1	I	TRUE	V	7	9	0	0.7193	-0.73169	2.5	3
15	GORASP2	459	456	S	1	S	TRUE	-	8	9	0.88889	0.03283	-7.08514
16	GORASP2	460	457	L	1	L	TRUE	-	8	9	0.88889	0.03283	-7.08514
0	GPC6	262	262	A	1	A	TRUE	T	6	8	0	0.763	-0.99539	0.14286	3.85714
1	GPC6	393	393	D	1	D	TRUE	H	4	8	0.375	0.53143	-4.4178	-1	8
2	GPC6	415	415	A	1	A	TRUE	T	7	8	0	0.84502	0.21677	0	5
3	GPC6	543	543	G	1	G	TRUE	Q	5	8	0	0.79065	-0.58677	-2	3.09524
0	GPM6B	50	50	M	1	M	TRUE	L	8	9	0	0.77317	-1.31934	2	4
32	GPX4	44	1	M	1	M	TRUE	R	3	6	0	0.7707	0.66785	-1.4	1
33	GPX4	45	2	I	1	I	TRUE	A	4	6	0	0.6965	0.46987	-0.2	2.4
34	GPX4	46	3	L	1	L	TRUE	C	3	6	0	0.81095	0.77524	-1.4	1.4
35	GPX4	49	6	L	1	L	TRUE	R	5	6	0	0.85357	0.88896	-2	5
36	GPX4	50	7	S	1	S	TRUE	R	5	6	0	0.85357	0.88896	-1	5
37	GPX4	51	8	R	1	R	TRUE	A	5	6	0	0.79883	0.7429	-1	4
38	GPX4	52	9	F	1	F	TRUE	R	5	6	0	0.85357	0.88896	-3	5
39	GPX4	53	10	S	1	S	TRUE	P	3	6	0	0.77364	0.6757	-1	1.4
40	GPX4	55	12	L	1	L	TRUE	R	5	6	0	0.85357	0.88896	-2	5
41	GPX4	56	13	L	1	L	TRUE	K	2	6	0	0.72168	0.53706	-0.4	0.8
42	GPX4	59	16	A	1	A	TRUE	-	5	6	0.83333	0.03283	-1.3008
43	GPX4	60	17	L	1	L	TRUE	-	5	6	0.83333	0.03283	-1.3008
44	GPX4	61	18	L	1	L	TRUE	-	5	6	0.83333	0.03283	-1.3008
45	GPX4	63	20	G	1	G	TRUE	P	5	6	0	0.87149	0.93676	-2	7
46	GPX4	64	21	A	1	A	TRUE	E	3	6	0	0.74357	0.59547	-1	2
47	GPX4	65	22	L	1	L	TRUE	S	3	6	0	0.75562	0.62761	-2.4	1.3
48	GPX4	66	23	A	1	A	TRUE	F	2	6	0.16667	0.56247	0.1123	-1.5	1.66667
49	GPX4	67	24	A	1	A	TRUE	N	2	6	0.16667	0.61429	0.25054	-1.5	1.83333
50	GPX4	75	30	T	1	T	TRUE	C	2	6	0	0.69686	0.47085	-1	-0.4
51	GPX4	76	31	M	1	M	TRUE	P	5	6	0	0.87149	0.93676	-2	7
57	GPX4	93	35	H	1	H	TRUE	R	5	6	0	0.85357	0.88896	0	5
58	GPX4	99	41	C	1	C	TRUE	A	5	6	0	0.79883	0.7429	0	4
59	GPX4	104	46	D	1	D	TRUE	E	5	6	0	0.83652	0.84347	2	5
60	GPX4	121	63	K	1	K	TRUE	R	5	6	0	0.85357	0.88896	2	5
61	GPX4	132	74	T	1	T	TRUE	S	5	6	0	0.83652	0.84347	1	4
62	GPX4	173	115	T	1	T	TRUE	S	5	6	0	0.83652	0.84347	1	4
63	GPX4	183	125	S	1	S	TRUE	G	5	6	0	0.78946	0.7179	0	6
64	GPX4	199	141	E	1	E	TRUE	D	5	6	0	0.8514	0.88316	2	6
1	GSTP1	49	49	V	1	V	TRUE	L	8	9	0	0.77317	-0.45545	1	4
2	GSTP1	62	62	N	1	N	TRUE	T	8	9	0	0.84502	0.5227	0	5
5	GSTP1	118	118	N	1	N	TRUE	D	7	9	0	0.76978	-0.50163	1	4.5
6	GSTP1	132	132	N	1	N	TRUE	T	8	9	0	0.84502	0.5227	0	5
7	GSTP1	145	145	I	1	I	TRUE	V	8	9	0	0.81043	0.05172	3	4
0	HAUS2	6	6	A	1	A	TRUE	P	10	11	0	0.87156	0.82787	-1	7
1	HAUS2	15	15	S	1	S	TRUE	A	8	11	0	0.69523	-0.26704	0.8	2.62222
2	HAUS2	39	39	R	1	R	TRUE	K	8	11	0	0.77189	0.20899	1.6	3.24444
3	HAUS2	46	46	K	1	K	TRUE	N	10	11	0	0.8762	0.85663	0	6
4	HAUS2	64	64	S	1	S	TRUE	N	9	11	0	0.79624	0.36014	0.9	5
7	HAUS2	127	127	F	1	F	TRUE	V	10	11	0	0.81043	0.44825	-1	4
9	HAUS2	171	171	T	1	T	TRUE	A	10	11	0	0.7989	0.37669	0	4
10	HAUS2	175	175	V	1	V	TRUE	I	10	11	0	0.8304	0.57226	3	4
11	HAUS2	219	212	Q	1	Q	TRUE	H	7	11	0	0.81437	0.47275	-0.5	3.95556
12	HAUS2	229	218	I	1	I	TRUE	M	4	11	0.27273	0.48678	-1.56136	1.28571	1.80952
13	HAUS2	238	227	G	1	G	TRUE	V	6	11	0.09091	0.54909	-1.17444	-2.44444	1.88889
15	HAUS2	243	232	T	1	T	TRUE	I	5	11	0.18182	0.51763	-1.36979	-0.625	0.14286
16	HAUS2	245	234	I	1	I	TRUE	A	6	11	0.09091	0.56847	-1.05413	-0.11111	1.77778
0	HDLBP	66	66	T	1	T	TRUE	N	7	8	0	0.8762	0.95022	0	6
1	HDLBP	426	426	S	1	S	TRUE	G	5	8	0	0.67206	-3.48751	0.28571	3.04762
2	HDLBP	445	445	R	1	R	TRUE	K	7	8	0	0.8429	0.22633	2	5
3	HDLBP	854	854	E	1	E	TRUE	D	7	8	0	0.85147	0.41272	2	6
4	HDLBP	883	883	R	1	R	TRUE	K	7	8	0	0.8429	0.22633	2	5
5	HDLBP	903	903	H	1	H	TRUE	Y	5	8	0	0.8078	-0.53672	1.14286	5.04762
6	HDLBP	918	918	P	1	P	TRUE	H	7	8	0	0.91606	1.81675	-2	8
7	HDLBP	936	936	-	1	-	TRUE	E	5	8	0.125	0.74571	-1.88655		3.61905
8	HDLBP	937	936	-	1	-	TRUE	A	5	8	0.125	0.62388	-4.53494		1.80952
9	HDLBP	938	936	-	1	-	TRUE	K	6	8	0.125	0.76787	-1.40481		4.14286
10	HDLBP	959	956	R	1	R	TRUE	K	7	8	0	0.8429	0.22633	2	5
11	HDLBP	1013	1010	R	1	R	TRUE	L	7	8	0	0.77317	-1.28946	-2	4
12	HDLBP	1115	1112	N	1	N	TRUE	D	7	8	0	0.85147	0.41272	1	6
13	HDLBP	1166	1163	T	1	T	TRUE	S	7	8	0	0.8366	0.08933	1	4
14	HDLBP	1209	1206	G	1	G	TRUE	V	6	8	0	0.70332	-2.80804	-3.14286	3.14286
15	HDLBP	1211	1208	L	1	L	TRUE	M	7	8	0	0.91875	1.87529	2	5
1	HMGCS1	279	279	M	1	M	TRUE	L	5	8	0	0.70089	-2.55454	1.42857	2.19048
2	HMGCS1	293	293	T	1	T	TRUE	S	7	8	0	0.8366	0.13216	1	4
3	HMGCS1	478	478	G	1	G	TRUE	D	7	8	0	0.85147	0.42667	-1	6
4	HMGCS1	506	506	S	1	S	TRUE	T	7	8	0	0.84502	0.29898	1	5
5	HMGCS1	512	512	V	1	V	TRUE	A	5	8	0	0.70305	-2.51171	-0.57143	2.57143
0	HNRNPH1	445	445	N	1	N	TRUE	S	7	8	0	0.8366	-0.06098	1	4
0	HPDL	4	4	H	1	H	TRUE	P	9	10	0	0.87156	0.76337	-2	7
1	HPDL	14	14	Q	1	Q	TRUE	H	9	10	0	0.91606	1.06127	0	8
2	HPDL	16	16	A	1	A	TRUE	P	9	10	0	0.87156	0.76337	-1	7
3	HPDL	27	27	C	1	C	TRUE	R	9	10	0	0.85365	0.64342	-3	5
4	HPDL	86	86	D	1	D	TRUE	A	5	10	0	0.63326	-0.83216	-0.55556	1.02778
5	HPDL	90	90	T	1	T	TRUE	A	7	10	0	0.64488	-0.75436	-0.33333	2.08333
6	HPDL	93	93	Q	1	Q	TRUE	R	9	10	0	0.85365	0.64342	1	5
7	HPDL	94	94	V	1	V	TRUE	A	6	10	0	0.61972	-0.92282	-0.77778	1.36111
8	HPDL	101	101	R	1	R	TRUE	S	6	10	0	0.66848	-0.59632	-1.44444	1.22222
9	HPDL	139	139	H	1	H	TRUE	R	7	10	0	0.67996	-0.51947	-0.33333	2.33333
10	HPDL	152	152	K	1	K	TRUE	A	6	10	0	0.70619	-0.34384	-1	2.08333
11	HPDL	154	154	D	1	D	TRUE	G	9	10	0	0.78953	0.21416	-1	6
12	HPDL	155	155	A	1	A	TRUE	P	9	10	0	0.87156	0.76337	-1	7
13	HPDL	177	177	R	1	R	TRUE	M	5	10	0	0.69203	-0.43868	-1.33333	2.25
14	HPDL	181	181	Q	1	Q	TRUE	H	8	10	0	0.83976	0.55046	0.22222	6.22222
15	HPDL	192	192	N	1	N	TRUE	S	9	10	0	0.8366	0.52925	1	4
17	HPDL	204	204	V	1	V	TRUE	A	4	10	0	0.51724	-1.60892	-0.66667	0.58333
19	HPDL	209	209	N	1	N	TRUE	L	4	10	0	0.57176	-1.24388	-1.66667	-0.63889
20	HPDL	215	215	M	1	M	TRUE	T	9	10	0	0.84502	0.58567	-1	5
21	HPDL	239	239	Y	1	Y	TRUE	S	4	10	0	0.61218	-0.97328	-2.22222	1.25
22	HPDL	249	249	V	1	V	TRUE	A	7	10	0	0.71317	-0.29713	0	2.47222
23	HPDL	275	275	L	1	L	TRUE	G	3	10	0	0.49071	-1.78654	-2.11111	-0.55556
24	HPDL	295	295	K	1	K	TRUE	E	5	10	0	0.74238	-0.10152	1.44444	2.22222
25	HPDL	302	302	L	1	L	TRUE	H	7	10	0	0.84613	0.59308	-2.77778	4.80556
26	HPDL	303	303	I	1	I	TRUE	E	6	10	0	0.73793	-0.13137	-3	3
27	HPDL	306	306	V	1	V	TRUE	L	8	10	0	0.71444	-0.28859	0.77778	3.11111
28	HPDL	352	352	D	1	D	TRUE	G	7	10	0	0.72197	-0.23822	-0.55556	3.66667
0	IDH3A	366	366	N	1	N	TRUE	D	7	8	0	0.85147	0.37244	1	6
0	IDH3B	6	6	Y	1	Y	TRUE	G	4	9	0	0.64472	-2.27051	-2.5	1.10714
1	IDH3B	22	22	T	1	T	TRUE	A	8	9	0	0.7989	-0.29918	0	4
2	IDH3B	301	301	V	1	V	TRUE	A	8	9	0	0.7989	-0.29918	0	4
3	IDH3B	385	385	V	1	V	TRUE	G	6	9	0	0.69705	-1.60142	-2.75	3.35714
0	IFT52	11	11	D	1	D	TRUE	E	9	10	0	0.83659	0.36221	2	5
1	IFT52	14	14	V	1	V	TRUE	L	8	10	0	0.71537	-0.2895	0.66667	2.44444
2	IFT52	43	43	C	1	C	TRUE	S	8	10	0	0.74592	-0.12524	-1.22222	3.11111
3	IFT52	49	49	N	1	N	TRUE	S	9	10	0	0.83659	0.36221	1	4
4	IFT52	88	88	N	1	N	TRUE	G	4	10	0	0.61639	-0.8216	0.33333	1.19444
5	IFT52	104	102	T	1	T	TRUE	S	8	10	0	0.7402	-0.156	0.88889	3.33333
8	IFT52	460	441	V	1	V	TRUE	A	6	10	0.2	0.57791	-1.02849	-0.42857	2.57143
9	IFT52	462	443	P	1	P	TRUE	Q	6	10	0.2	0.63001	-0.7484	-1	3.28571
60	IPO5	908	804	F	1	F	TRUE	L	9	10	0	0.77317	-0.24518	0	4
62	IPO5	1091	987	L	1	L	TRUE	M	9	10	0	0.91875	0.73564	2	5
0	IPO8	134	109	I	1	I	TRUE	V	8	9	0	0.81043	0.01141	3	4
1	IPO8	160	135	N	1	N	TRUE	D	7	9	0	0.77085	-0.3114	1	4.5
2	IPO8	161	136	F	1	F	TRUE	Y	7	9	0	0.84782	0.31645	2.375	4.75
3	IPO8	347	322	I	1	I	TRUE	V	8	9	0	0.81043	0.01141	3	4
4	IPO8	604	579	I	1	I	TRUE	V	8	9	0	0.81043	0.01141	3	4
46	IPO8	857	806	-	1	-	TRUE	H	8	9	0.11111	0.91606	0.87308		8
47	IPO8	858	806	-	1	-	TRUE	D	8	9	0.11111	0.85147	0.34624		6
48	IPO8	859	806	-	1	-	TRUE	R	8	9	0.11111	0.85365	0.36399		5
49	IPO8	860	806	-	1	-	TRUE	K	8	9	0.11111	0.8429	0.2763		5
111	IPO8	928	859	-	1	-	TRUE	S	8	9	0.11111	0.8366	0.22489		4
267	IRF2BP2	320	35	S	1	S	TRUE	G	7	8	0	0.78953	-0.18601	0	6
0	ISCA2	12	12	T	1	T	TRUE	A	5	11	0	0.54546	-2.56819	-0.1	0.71111
1	ISCA2	27	26	S	1	S	TRUE	L	10	11	0	0.77317	-0.18237	-2	4
3	ISCA2	30	29	C	1	C	TRUE	S	7	11	0	0.7019	-0.92908	-1.4	1.04444
4	ISCA2	47	46	S	1	S	TRUE	G	8	11	0	0.70925	-0.85205	0	3.51111
5	ISCA2	59	58	R	1	R	TRUE	Q	10	11	0	0.89297	1.07278	1	5
6	ISCA2	142	141	E	1	E	TRUE	Q	10	11	0	0.89297	1.07278	2	5
0	ISPD	3	3	Q	1	Q	TRUE	A	2	8	0	0.54123	-0.7456	-0.85714	-0.04762
1	ISPD	6	6	R	1	R	TRUE	P	3	8	0	0.62635	-0.35001	-2.14286	-0.14286
3	ISPD	31	31	V	1	V	TRUE	A	5	8	0.125	0.61722	-0.39243	-0.33333	2.33333
6	ISPD	88	88	A	1	A	TRUE	V	7	8	0	0.81043	0.50547	0	4
7	ISPD	95	95	I	1	I	TRUE	V	7	8	0	0.81043	0.50547	3	4
8	ISPD	97	97	V	1	V	TRUE	A	5	8	0	0.70751	0.02718	0	2.14286
9	ISPD	108	108	N	1	N	TRUE	S	4	8	0	0.63707	-0.30016	0.57143	1.04762
10	ISPD	111	111	K	1	K	TRUE	Q	7	8	0	0.89297	0.88908	1	5
11	ISPD	114	114	K	1	K	TRUE	Q	5	8	0	0.75659	0.25529	0.14286	1.71429
12	ISPD	140	140	D	1	D	TRUE	E	7	8	0	0.8366	0.62709	2	5
13	ISPD	141	141	N	1	N	TRUE	D	7	8	0	0.85147	0.69623	1	6
14	ISPD	163	163	F	1	F	TRUE	V	7	8	0	0.81043	0.50547	-1	4
15	ISPD	184	184	V	1	V	TRUE	I	7	8	0	0.8304	0.59829	3	4
16	ISPD	295	295	N	1	N	TRUE	D	7	8	0	0.85147	0.69623	1	6
18	ISPD	300	300	S	1	S	TRUE	G	7	8	0	0.78953	0.40838	0	6
19	ISPD	309	309	T	1	T	TRUE	K	3	8	0	0.67455	-0.12598	-0.14286	1.38095
20	ISPD	315	315	H	1	H	TRUE	K	7	8	0	0.8429	0.65638	-1	5
21	ISPD	317	317	R	1	R	TRUE	T	5	8	0	0.73121	0.13732	-1.57143	2.57143
22	ISPD	319	319	Q	1	Q	TRUE	E	2	8	0.125	0.53679	-0.7662	-0.33333	-0.26667
23	ISPD	322	322	Y	1	Y	TRUE	C	2	8	0.125	0.54955	-0.70692	-2.5	-0.46667
24	ISPD	323	323	N	1	N	TRUE	H	5	8	0.125	0.728	0.12243	0.83333	5.33333
25	ISPD	326	326	S	1	S	TRUE	R	4	8	0	0.64689	-0.25452	-0.57143	1.14286
26	ISPD	330	330	H	1	H	TRUE	Q	5	8	0	0.81096	0.50794	0.28571	2.66667
27	ISPD	345	345	K	1	K	TRUE	M	3	8	0	0.62311	-0.36505	-1.28571	0.90476
28	ISPD	346	346	E	1	E	TRUE	T	4	8	0	0.65076	-0.23656	-0.71429	2.09524
29	ISPD	356	356	M	1	M	TRUE	L	7	8	0	0.77317	0.33234	2	4
30	ISPD	364	364	F	1	F	TRUE	L	7	8	0	0.77317	0.33234	0	4
31	ISPD	369	369	S	1	S	TRUE	P	7	8	0	0.87156	0.7896	-1	7
32	ISPD	370	370	I	1	I	TRUE	V	7	8	0	0.81043	0.50547	3	4
35	ISPD	384	384	S	1	S	TRUE	P	7	8	0	0.87156	0.7896	-1	7
36	ISPD	394	394	C	1	C	TRUE	W	3	8	0	0.72124	0.09099	-2.57143	0.19048
37	ISPD	401	401	K	1	K	TRUE	E	7	8	0	0.8366	0.62709	1	5
38	ISPD	402	402	M	1	M	TRUE	V	6	8	0	0.71693	0.07096	0.71429	2.85714
39	ISPD	406	406	K	1	K	TRUE	N	7	8	0	0.8762	0.81113	0	6
40	ISPD	413	413	I	1	I	TRUE	L	7	8	0	0.77317	0.33234	2	4
0	KIAA1217	84	35	V	1	V	TRUE	L	4	9	0.11111	0.57326	-1.21679	-0.28571	-0.14286
1	KIAA1217	100	51	S	1	S	TRUE	N	7	9	0.11111	0.76852	0.03028	1	6
2	KIAA1217	103	54	T	1	T	TRUE	V	4	9	0.11111	0.52088	-1.55125	-0.57143	0.28571
3	KIAA1217	210	161	S	1	S	TRUE	G	8	9	0	0.78953	0.16446	0	6
4	KIAA1217	347	298	S	1	S	TRUE	N	8	9	0	0.8762	0.71793	1	6
5	KIAA1217	357	308	L	1	L	TRUE	M	7	9	0	0.82841	0.41275	1.875	4
6	KIAA1217	597	548	F	1	F	TRUE	I	8	9	0	0.8304	0.42544	0	4
7	KIAA1217	692	643	I	1	I	TRUE	V	8	9	0	0.81043	0.29789	3	4
8	KIAA1217	701	652	Q	1	Q	TRUE	L	4	9	0	0.66054	-0.65935	-2	2.28571
9	KIAA1217	703	654	A	1	A	TRUE	S	7	9	0	0.77161	0.05	0.625	2.5
11	KIAA1217	713	664	T	1	T	TRUE	A	6	9	0	0.69268	-0.45411	0	2.28571
12	KIAA1217	726	677	K	1	K	TRUE	R	8	9	0	0.85365	0.57392	2	5
13	KIAA1217	733	684	K	1	K	TRUE	R	8	9	0	0.85365	0.57392	2	5
14	KIAA1217	766	717	V	1	V	TRUE	I	4	9	0	0.69606	-0.43251	1.25	0.5
15	KIAA1217	889	840	I	1	I	TRUE	T	4	9	0	0.71565	-0.30737	1	1.92857
16	KIAA1217	934	885	G	1	G	TRUE	T	3	9	0.11111	0.54874	-1.37338	-0.85714	1.57143
17	KIAA1217	936	887	S	1	S	TRUE	G	7	9	0.11111	0.69157	-0.46119	0	6
18	KIAA1217	978	928	L	1	L	TRUE	S	6	9	0	0.72696	-0.23515	-1.25	1.42857
19	KIAA1217	989	939	V	1	V	TRUE	G	6	9	0.22222	0.60366	-1.02258	-3	6
20	KIAA1217	993	943	T	1	T	TRUE	P	6	9	0.22222	0.66639	-0.62201	-1	7
21	KIAA1217	995	945	S	1	S	TRUE	P	3	9	0	0.56731	-1.25473	-0.875	0.10714
22	KIAA1217	997	947	N	1	N	TRUE	S	7	9	0.11111	0.73379	-0.19156	1	4
23	KIAA1217	1022	972	T	1	T	TRUE	V	3	9	0	0.55722	-1.31917	-0.875	-0.07143
24	KIAA1217	1094	1044	A	1	A	TRUE	G	6	9	0	0.6972	-0.42523	0.25	3.35714
25	KIAA1217	1118	1067	P	1	P	TRUE	Q	6	9	0	0.7543	-0.06053	-1.5	1.96429
26	KIAA1217	1168	1117	G	1	G	TRUE	S	8	9	0	0.8366	0.46502	0	4
27	KIAA1217	1171	1120	V	1	V	TRUE	A	6	9	0	0.7262	-0.24001	-0.5	1.96429
28	KIAA1217	1173	1122	S	1	S	TRUE	P	8	9	0	0.87156	0.68834	-1	7
29	KIAA1217	1203	1152	L	1	L	TRUE	S	7	9	0	0.77237	0.05486	-1.75	2.5
30	KIAA1217	1230	1179	E	1	E	TRUE	D	8	9	0	0.85147	0.56002	2	6
33	KIAA1217	1277	1226	I	1	I	TRUE	F	8	9	0	0.86927	0.6737	0	6
34	KIAA1217	1290	1239	D	1	D	TRUE	E	8	9	0	0.8366	0.46502	2	5
35	KIAA1217	1312	1261	Q	1	Q	TRUE	K	8	9	0	0.8429	0.50527	1	5
36	KIAA1217	1330	1279	H	1	H	TRUE	Y	6	9	0	0.84116	0.49418	0.75	3.21429
38	KIAA1217	1380	1329	Q	1	Q	TRUE	K	7	9	0	0.78065	0.1077	0.875	3.75
39	KIAA1217	1388	1337	L	1	L	TRUE	I	3	9	0	0.51752	-1.57273	0.25	0.5
41	KIAA1217	1406	1355	E	1	E	TRUE	Q	5	9	0	0.7522	-0.074	1.5	2.25
42	KIAA1217	1409	1358	P	1	P	TRUE	Q	6	9	0.22222	0.68275	-0.51748	-1	5
43	KIAA1217	1427	1376	N	1	N	TRUE	S	5	9	0	0.73698	-0.17115	0.625	2.5
44	KIAA1217	1428	1377	S	1	S	TRUE	V	3	9	0	0.53573	-1.45644	-1.25	1.42857
45	KIAA1217	1431	1380	I	1	I	TRUE	V	6	9	0	0.73606	-0.17702	2.25	1.92857
46	KIAA1217	1432	1381	R	1	R	TRUE	K	8	9	0	0.8429	0.50527	2	5
48	KIAA1217	1438	1387	G	1	G	TRUE	V	8	9	0	0.81043	0.29789	-3	4
49	KIAA1217	1439	1388	L	1	L	TRUE	P	6	9	0	0.76988	0.03895	-1.75	2.60714
50	KIAA1217	1443	1392	I	1	I	TRUE	F	5	9	0	0.72564	-0.24361	-0.5	2.96429
51	KIAA1217	1444	1393	S	1	S	TRUE	G	8	9	0	0.78953	0.16446	0	6
52	KIAA1217	1453	1402	T	1	T	TRUE	A	6	9	0	0.67933	-0.53932	-0.5	2.35714
53	KIAA1217	1456	1405	G	1	G	TRUE	A	7	9	0	0.72664	-0.23719	-0.25	3
54	KIAA1217	1458	1407	L	1	L	TRUE	V	4	9	0	0.6818	-0.52359	0.75	1.35714
55	KIAA1217	1462	1411	D	1	D	TRUE	E	8	9	0	0.8366	0.46502	2	5
56	KIAA1217	1465	1414	D	1	D	TRUE	E	7	9	0	0.74342	-0.13001	1.5	3.5
57	KIAA1217	1467	1416	I	1	I	TRUE	T	5	9	0	0.7081	-0.35561	-1	2.03571
58	KIAA1217	1469	1418	G	1	G	TRUE	S	8	9	0	0.8366	0.46502	0	4
59	KIAA1217	1516	1465	T	1	T	TRUE	A	6	9	0	0.67933	-0.53932	-0.5	2.35714
60	KIAA1217	1526	1475	V	1	V	TRUE	G	8	9	0	0.78953	0.16446	-3	6
61	KIAA1217	1593	1541	K	1	K	TRUE	Q	6	9	0.11111	0.7152	-0.31027	1.14286	3.85714
62	KIAA1217	1596	1544	A	1	A	TRUE	T	5	9	0	0.69444	-0.44282	-0.375	2.25
63	KIAA1217	1598	1546	H	1	H	TRUE	Q	3	9	0	0.67625	-0.55905	-0.875	0.57143
64	KIAA1217	1599	1547	M	1	M	TRUE	K	4	9	0	0.70119	-0.39977	-0.625	2.03571
65	KIAA1217	1603	1550	T	1	T	TRUE	K	6	9	0	0.74534	-0.11777	-1	3.28571
66	KIAA1217	1611	1558	S	1	S	TRUE	R	5	9	0	0.67352	-0.57647	-0.625	1.32143
67	KIAA1217	1612	1559	E	1	E	TRUE	A	3	9	0	0.53056	-1.48944	-1.25	0.35714
68	KIAA1217	1616	1563	T	1	T	TRUE	A	6	9	0	0.69268	-0.45411	0	2.28571
69	KIAA1217	1618	1565	M	1	M	TRUE	S	4	9	0	0.73553	-0.18046	-1	2.5
70	KIAA1217	1619	1566	I	1	I	TRUE	K	4	9	0	0.631	-0.848	-2.625	1.35714
71	KIAA1217	1621	1568	K	1	K	TRUE	Q	8	9	0	0.89297	0.82504	1	5
72	KIAA1217	1623	1570	L	1	L	TRUE	H	6	9	0	0.77517	0.07272	-2.875	3.78571
73	KIAA1217	1631	1578	P	1	P	TRUE	I	2	9	0	0.49711	-1.70306	-1.875	0.17857
74	KIAA1217	1633	1580	A	1	A	TRUE	G	8	9	0	0.78953	0.16446	0	6
75	KIAA1217	1636	1583	A	1	A	TRUE	E	7	9	0	0.74007	-0.15145	-0.875	3.25
76	KIAA1217	1639	1586	P	1	P	TRUE	K	4	9	0	0.61051	-0.97889	-1.375	1.53571
77	KIAA1217	1643	1590	C	1	C	TRUE	I	3	9	0	0.58736	-1.12674	-2.25	-1.03571
78	KIAA1217	1647	1594	L	1	L	TRUE	H	2	9	0	0.66795	-0.61202	-2.5	0.14286
80	KIAA1217	1749	1695	V	1	V	TRUE	A	3	9	0	0.54868	-1.37371	-0.75	0.42857
81	KIAA1217	1750	1696	Q	1	Q	TRUE	P	7	9	0	0.76928	0.03513	-1.125	4.5
82	KIAA1217	1770	1716	K	1	K	TRUE	Q	8	9	0	0.89297	0.82504	1	5
83	KIAA1217	1777	1723	S	1	S	TRUE	N	8	9	0	0.8762	0.71793	1	6
84	KIAA1217	1797	1743	E	1	E	TRUE	D	7	9	0	0.75574	-0.05134	1.5	4.25
85	KIAA1217	1807	1753	H	1	H	TRUE	Q	8	9	0	0.89297	0.82504	0	5
86	KIAA1217	1810	1756	P	1	P	TRUE	S	5	9	0	0.67222	-0.58476	-1.5	1.25
88	KIAA1217	1830	1776	V	1	V	TRUE	I	8	9	0	0.8304	0.42544	3	4
89	KIAA1217	1839	1785	G	1	G	TRUE	S	5	9	0	0.73698	-0.17115	-0.75	2.5
90	KIAA1217	1886	1832	V	1	V	TRUE	G	8	9	0	0.78953	0.16446	-3	6
91	KIAA1217	1935	1881	T	1	T	TRUE	A	4	9	0	0.72808	-0.22802	-0.5	1.78571
92	KIAA1217	1988	1933	V	1	V	TRUE	A	6	9	0	0.72695	-0.23523	-0.5	1.96429
93	KIAA1217	2007	1952	S	1	S	TRUE	N	8	9	0	0.8762	0.71793	1	6
0	KIFC2	53	23	T	1	T	TRUE	A	9	10	0	0.7989	0.48252	0	4
1	KIFC2	55	25	T	1	T	TRUE	A	5	10	0	0.56793	-0.46621	0	0.97222
3	KIFC2	80	36	H	1	H	TRUE	R	7	10	0	0.73346	0.21371	-0.44444	2.30556
4	KIFC2	92	48	L	1	L	TRUE	P	6	10	0	0.71109	0.12181	-2.22222	1.47222
5	KIFC2	105	61	A	1	A	TRUE	-	9	10	0.9	0.03283	-2.66411
6	KIFC2	127	76	D	1	D	TRUE	G	6	10	0	0.70387	0.09216	-1.33333	1.91667
7	KIFC2	148	97	H	1	H	TRUE	Q	9	10	0	0.89297	0.86891	0	5
9	KIFC2	160	108	E	1	E	TRUE	D	9	10	0	0.85147	0.69845	2	6
10	KIFC2	192	140	V	1	V	TRUE	A	8	10	0	0.71927	0.15543	-0.22222	3.33333
11	KIFC2	198	146	H	1	H	TRUE	Q	8	10	0.1	0.76542	0.345	0	5
12	KIFC2	202	150	N	1	N	TRUE	G	4	10	0	0.64233	-0.16058	-0.44444	0.16667
14	KIFC2	211	159	A	1	A	TRUE	S	7	10	0	0.76007	0.323	0.55556	2.13889
15	KIFC2	219	167	Y	1	Y	TRUE	S	8	10	0.1	0.75768	0.31321	-2	4
16	KIFC2	225	173	Q	1	Q	TRUE	P	4	10	0.3	0.49601	-0.76162	-1.33333	1.46667
17	KIFC2	238	186	L	1	L	TRUE	P	7	10	0.1	0.6782	-0.01327	-2.875	5
18	KIFC2	391	339	T	1	T	TRUE	A	9	10	0	0.7989	0.48252	0	4
19	KIFC2	480	423	C	1	C	TRUE	S	9	10	0	0.8366	0.63735	-1	4
20	KIFC2	487	430	A	1	A	TRUE	P	9	10	0	0.87156	0.78098	-1	7
21	KIFC2	511	454	S	1	S	TRUE	P	9	10	0	0.87156	0.78098	-1	7
22	KIFC2	521	464	G	1	G	TRUE	R	9	10	0	0.85365	0.70739	-2	5
23	KIFC2	682	593	S	1	S	TRUE	A	5	10	0	0.61094	-0.28951	0.33333	1.36111
24	KIFC2	685	596	P	1	P	TRUE	Q	9	10	0	0.89297	0.86891	-1	5
25	KIFC2	699	610	C	1	C	TRUE	R	9	10	0	0.85365	0.70739	-3	5
26	KIFC2	705	616	S	1	S	TRUE	R	9	10	0	0.85365	0.70739	-1	5
27	KIFC2	730	641	T	1	T	TRUE	A	8	10	0	0.70841	0.11081	0	3.11111
28	KIFC2	734	644	Q	1	Q	TRUE	P	3	10	0	0.54387	-0.565	-0.88889	-0.13889
29	KIFC2	769	679	S	1	S	TRUE	P	9	10	0	0.87156	0.78098	-1	7
32	KIFC2	830	740	K	1	K	TRUE	R	9	10	0	0.85365	0.70739	2	5
33	KIFC2	851	745	E	1	E	TRUE	G	8	10	0	0.69494	0.05548	-1.88889	4.66667
34	KIFC2	875	765	R	1	R	TRUE	P	8	10	0	0.77419	0.38103	-2	4.77778
35	KIFC2	878	768	V	1	V	TRUE	G	6	10	0	0.71634	0.14341	-2.66667	2.08333
36	KIFC2	898	780	C	1	C	TRUE	A	3	10	0	0.5869	-0.38828	-1.33333	1.41667
37	KIFC2	902	784	G	1	G	TRUE	A	3	10	0	0.5474	-0.55052	-1.44444	-0.44444
38	KIFC2	904	786	S	1	S	TRUE	P	5	10	0	0.64937	-0.13169	-0.66667	1.22222
0	KLF6	33	33	T	1	T	TRUE	P	4	6	0.16667	0.71678	-0.97585	-1	7
0	KTN1	124	124	L	1	L	TRUE	V	8	11	0	0.7175	-0.48167	0.4	1.86667
1	KTN1	138	138	V	1	V	TRUE	I	9	11	0	0.76468	-0.13655	2.7	3
2	KTN1	154	154	L	1	L	TRUE	P	10	11	0	0.87156	0.64533	-3	7
3	KTN1	161	159	T	1	T	TRUE	A	7	11	0	0.65146	-0.96476	-0.2	1.62222
4	KTN1	162	160	S	1	S	TRUE	A	10	11	0	0.7989	0.11378	1	4
51	KTN1	261	223	S	1	S	TRUE	P	10	11	0	0.87156	0.64533	-1	7
95	KTN1	332	255	A	1	A	TRUE	T	7	11	0	0.71016	-0.53533	0.1	2.53333
96	KTN1	348	271	I	1	I	TRUE	V	6	11	0	0.58557	-1.44674	2.2	1.84444
97	KTN1	467	390	A	1	A	TRUE	T	8	11	0	0.77169	-0.08523	-0.4	3.24444
98	KTN1	596	519	M	1	M	TRUE	I	10	11	0	0.8304	0.34419	1	4
119	KTN1	684	607	I	1	I	TRUE	M	10	11	0	0.91875	0.9905	1	5
120	KTN1	710	633	I	1	I	TRUE	M	9	11	0	0.82935	0.33651	1.2	4.2
145	KTN1	836	753	V	1	V	TRUE	L	10	11	0	0.77317	-0.07444	1	4
156	KTN1	896	813	V	1	V	TRUE	A	5	11	0	0.6228	-1.17439	-0.3	1.37778
157	KTN1	898	815	I	1	I	TRUE	L	10	11	0	0.77317	-0.07444	2	4
158	KTN1	925	842	Y	1	Y	TRUE	H	8	11	0.18182	0.70095	-0.60276	2	8
159	KTN1	926	843	M	1	M	TRUE	V	7	11	0.18182	0.55836	-1.64582	1	3.75
160	KTN1	929	846	A	1	A	TRUE	V	6	11	0.18182	0.56288	-1.61271	-0.5	1.92857
162	KTN1	963	880	V	1	V	TRUE	M	6	11	0	0.66983	-0.83035	1	1.55556
163	KTN1	989	906	Q	1	Q	TRUE	K	10	11	0	0.8429	0.43563	1	5
164	KTN1	1018	935	D	1	D	TRUE	E	10	11	0	0.83659	0.38953	2	5
206	KTN1	1128	1045	C	1	C	TRUE	H	7	11	0	0.81452	0.22802	-3	4.06667
207	KTN1	1132	1049	Q	1	Q	TRUE	K	9	11	0	0.77499	-0.0611	0.8	3.8
208	KTN1	1138	1055	I	1	I	TRUE	V	6	11	0	0.68274	-0.73593	1.7	1.46667
261	KTN1	1298	1199	V	1	V	TRUE	H	5	11	0	0.74587	-0.27415	-1	1
262	KTN1	1299	1200	I	1	I	TRUE	T	6	11	0	0.64408	-1.01871	-1.2	2.2
47	LAMP2	50	50	Y	1	Y	TRUE	C	6	9	0.11111	0.68312	0.11781	-1.85714	6.14286
48	LAMP2	53	53	P	1	P	TRUE	L	7	9	0.11111	0.65937	0.02247	-3	4
49	LAMP2	55	55	W	1	W	TRUE	P	7	9	0.11111	0.74329	0.35931	-4	7
50	LAMP2	56	56	L	1	L	TRUE	V	7	9	0.11111	0.69114	0.15001	1	4
51	LAMP2	57	57	S	1	S	TRUE	P	5	9	0.11111	0.59913	-0.21935	-0.57143	2.80952
52	LAMP2	71	71	D	1	D	TRUE	V	7	9	0.11111	0.69114	0.15001	-3	4
53	LAMP2	74	74	H	1	H	TRUE	Y	5	9	0.11111	0.63195	-0.08762	1.42857	2.19048
55	LAMP2	112	112	N	1	N	TRUE	T	6	9	0	0.74522	0.36705	0.25	3.25
56	LAMP2	117	117	S	1	S	TRUE	G	4	9	0	0.65492	0.00459	0	1.21429
57	LAMP2	118	118	N	1	N	TRUE	T	3	9	0	0.56037	-0.37494	-0.375	0.67857
58	LAMP2	122	122	E	1	E	TRUE	N	7	9	0	0.79779	0.57809	0.25	4.75
59	LAMP2	125	125	T	1	T	TRUE	I	3	9	0	0.49925	-0.62025	-0.375	0.03571
61	LAMP2	157	152	H	1	H	TRUE	E	3	9	0	0.62766	-0.10481	-0.875	1.10714
62	LAMP2	159	154	P	1	P	TRUE	S	8	9	0	0.83658	0.73379	-1	4
64	LAMP2	165	160	T	1	T	TRUE	S	5	9	0	0.68786	0.13683	0.5	2.07143
65	LAMP2	172	167	I	1	I	TRUE	T	8	9	0	0.84501	0.76761	-1	5
66	LAMP2	173	168	H	1	H	TRUE	G	3	9	0	0.56901	-0.34024	-1	1
67	LAMP2	174	169	N	1	N	TRUE	D	8	9	0	0.85146	0.7935	1	6
68	LAMP2	175	170	H	1	H	TRUE	N	5	9	0	0.6959	0.16908	0	2.57143
69	LAMP2	183	178	H	1	H	TRUE	D	4	9	0	0.5398	-0.4575	-1.125	0.85714
70	LAMP2	187	182	I	1	I	TRUE	L	6	9	0	0.67317	0.07786	1.125	1.46429
71	LAMP2	189	184	I	1	I	TRUE	V	8	9	0	0.81041	0.62874	3	4
72	LAMP2	193	187	H	1	H	TRUE	P	3	9	0	0.58283	-0.28478	-1.75	-0.53571
73	LAMP2	221	215	I	1	I	TRUE	Y	7	9	0	0.82241	0.67691	-0.875	6
74	LAMP2	223	217	N	1	N	TRUE	D	6	9	0	0.72125	0.27085	0.75	3
75	LAMP2	247	241	H	1	H	TRUE	T	7	9	0	0.74636	0.37166	-2	3.75
76	LAMP2	264	258	P	1	P	TRUE	T	7	9	0.11111	0.74788	0.37776	-1	5
77	LAMP2	283	267	Y	1	Y	TRUE	E	4	9	0	0.59186	-0.24853	-2	0.78571
78	LAMP2	291	275	D	1	D	TRUE	N	7	9	0	0.79658	0.57321	0.875	4.75
79	LAMP2	294	278	S	1	S	TRUE	D	4	9	0	0.55723	-0.38755	0.25	0.64286
80	LAMP2	313	297	S	1	S	TRUE	A	5	9	0	0.72522	0.2868	0.25	1.64286
81	LAMP2	322	306	S	1	S	TRUE	T	6	9	0	0.73048	0.3079	0.25	2.82143
82	LAMP2	325	309	V	1	V	TRUE	A	2	9	0	0.53444	-0.47902	-0.875	-0.14286
83	LAMP2	367	351	L	1	L	TRUE	M	7	9	0	0.82747	0.69721	1.875	4
84	LAMP2	396	380	H	1	H	TRUE	N	8	9	0	0.87618	0.89275	1	6
85	LAMP2	413	397	E	1	E	TRUE	D	4	9	0	0.6733	0.07838	0.75	2.21429
0	LAMTOR5	31	3	T	1	T	TRUE	S	2	4	0	0.75746	0.22441	0	0
1	LAMTOR5	32	4	G	1	G	TRUE	S	2	4	0	0.74776	0.17461	-0.66667	0.66667
2	LAMTOR5	34	6	K	1	K	TRUE	E	2	4	0	0.7464	0.16763	1.33333	1.66667
3	LAMTOR5	40	12	S	1	S	TRUE	A	2	4	0	0.68021	-0.17236	0	1.33333
4	LAMTOR5	41	13	M	1	M	TRUE	I	1	4	0	0.60735	-0.54663	0.66667	0
5	LAMTOR5	43	15	L	1	L	TRUE	F	3	4	0	0.86927	0.79875	0	6
6	LAMTOR5	51	23	E	1	E	TRUE	R	3	4	0	0.85365	0.71849	0	5
7	LAMTOR5	52	24	C	1	C	TRUE	S	2	4	0	0.74776	0.17461	-1.66667	0.66667
8	LAMTOR5	53	25	V	1	V	TRUE	A	1	4	0	0.64799	-0.33788	-0.66667	-0.66667
9	LAMTOR5	55	27	P	1	P	TRUE	R	2	4	0	0.80468	0.46699	-2.33333	-0.33333
10	LAMTOR5	56	28	P	1	P	TRUE	S	3	4	0	0.8366	0.6309	-1	4
11	LAMTOR5	61	33	K	1	K	TRUE	E	2	4	0	0.74502	0.16053	0.33333	3
12	LAMTOR5	64	36	N	1	N	TRUE	G	2	4	0	0.69426	-0.10022	0	0.66667
18	LAMTOR5	75	40	A	1	A	TRUE	A	1	4	0	0.62519	-0.45501	-1	-0.33333
19	LAMTOR5	79	44	L	1	L	TRUE	L	1	4	0	0.63238	-0.41808	-0.66667	-0.33333
20	LAMTOR5	80	45	S	1	S	TRUE	V	2	4	0	0.69185	-0.11258	-1	1.33333
21	LAMTOR5	86	46	S	1	S	TRUE	G	2	4	0	0.74767	0.17412	-0.33333	0
0	LDHA	336	307	N	1	N	TRUE	T	7	8	0	0.84502	0.46446	0	5
0	LEO1	57	57	N	1	N	TRUE	S	9	10	0	0.8366	0.27556	1	4
1	LEO1	214	202	P	1	P	TRUE	Q	9	10	0	0.89297	0.65634	-1	5
3	LEO1	244	232	D	1	D	TRUE	E	9	10	0	0.8366	0.27556	2	5
0	LIG1	48	6	R	1	R	TRUE	M	9	10	0	0.91875	0.93388	-1	5
1	LIG1	68	25	T	1	T	TRUE	S	6	10	0	0.66552	-0.26442	0.44444	1.63889
2	LIG1	89	46	L	1	L	TRUE	V	8	10	0	0.74747	0.12337	0.88889	2.88889
3	LIG1	123	79	C	1	C	TRUE	K	5	10	0	0.69989	-0.10179	-3	2.86111
4	LIG1	148	85	Q	1	Q	TRUE	P	4	10	0	0.60397	-0.5557	-0.66667	0.44444
5	LIG1	153	90	G	1	G	TRUE	V	4	10	0	0.54431	-0.838	-1.44444	0.11111
6	LIG1	160	97	L	1	L	TRUE	T	4	10	0.1	0.53737	-0.87082	-1.5	1.32143
7	LIG1	162	99	S	1	S	TRUE	P	8	10	0	0.7828	0.29056	-1.11111	5
8	LIG1	163	100	G	1	G	TRUE	E	8	10	0	0.77345	0.24633	-2	3.66667
9	LIG1	168	105	V	1	V	TRUE	L	4	10	0.1	0.54719	-0.82435	-0.5	-0.64286
10	LIG1	170	107	N	1	N	TRUE	D	3	10	0.1	0.56284	-0.75031	0.375	0.42857
11	LIG1	173	110	L	1	L	TRUE	P	8	10	0	0.79792	0.36209	-2.88889	5.22222
12	LIG1	176	113	T	1	T	TRUE	I	4	10	0	0.47458	-1.16795	-0.33333	0.61111
13	LIG1	195	132	S	1	S	TRUE	T	7	10	0.1	0.66335	-0.27468	1	3.75
14	LIG1	196	133	M	1	M	TRUE	I	6	10	0.1	0.65839	-0.29817	0.75	2.35714
15	LIG1	207	144	M	1	M	TRUE	K	5	10	0.1	0.64775	-0.3485	-1.375	2.85714
17	LIG1	216	153	A	1	A	TRUE	E	4	10	0.1	0.58334	-0.65331	-0.875	1.78571
23	LIG1	226	163	D	1	D	TRUE	E	8	10	0	0.78554	0.30355	1.77778	4.33333
24	LIG1	240	177	T	1	T	TRUE	K	4	10	0	0.63066	-0.4294	-1	2.05556
25	LIG1	244	181	A	1	A	TRUE	E	6	10	0	0.70435	-0.08068	-1	3.11111
26	LIG1	247	184	E	1	E	TRUE	D	7	10	0.1	0.68965	-0.15022	1.625	4.25
27	LIG1	248	185	H	1	H	TRUE	Q	6	10	0.1	0.70304	-0.08686	0	3.28571
28	LIG1	250	187	S	1	S	TRUE	T	5	10	0.1	0.63019	-0.43161	0.125	1.5
29	LIG1	254	191	D	1	D	TRUE	E	6	10	0.1	0.65423	-0.31784	1.25	3.28571
30	LIG1	258	195	P	1	P	TRUE	T	4	10	0.1	0.59783	-0.58473	-1.125	2.03571
31	LIG1	265	202	A	1	A	TRUE	-	6	10	0.6	0.23168	-2.31741	0	1.66667
32	LIG1	272	206	G	1	G	TRUE	S	6	10	0.1	0.66927	-0.24669	0	2.78571
33	LIG1	273	207	T	1	T	TRUE	V	4	10	0.1	0.55412	-0.79158	-0.25	2.07143
34	LIG1	275	209	A	1	A	TRUE	E	5	10	0.1	0.53968	-0.85992	-0.75	0.53571
35	LIG1	279	213	P	1	P	TRUE	-	9	10	0.9	0.03283	-3.25835
36	LIG1	280	214	K	1	K	TRUE	-	9	10	0.9	0.03283	-3.25835
37	LIG1	282	216	V	1	V	TRUE	A	3	10	0.1	0.52467	-0.93094	-0.75	0.75
38	LIG1	283	217	S	1	S	TRUE	V	5	10	0.1	0.55593	-0.78302	-1.125	0.82143
39	LIG1	284	218	R	1	R	TRUE	K	6	10	0.1	0.68415	-0.17627	1.75	3.28571
40	LIG1	291	225	D	1	D	TRUE	E	4	10	0.2	0.4945	-1.0737	0.71429	0.57143
41	LIG1	331	250	I	1	I	TRUE	K	6	10	0	0.66702	-0.25733	-2.33333	1.72222
42	LIG1	443	360	S	1	S	TRUE	G	9	10	0	0.78953	0.32242	0	6
43	LIG1	459	376	T	1	T	TRUE	S	8	10	0	0.75948	0.1802	0.77778	2.66667
44	LIG1	492	409	T	1	T	TRUE	A	7	10	0	0.64516	-0.36075	-0.11111	2.22222
45	LIG1	568	484	Y	1	Y	TRUE	F	6	10	0	0.67394	-0.22458	1.44444	1.75
46	LIG1	579	495	R	1	R	TRUE	K	9	10	0	0.8429	0.57494	2	5
47	LIG1	592	508	C	1	C	TRUE	G	8	10	0	0.70012	-0.10069	-2.66667	4.66667
48	LIG1	593	509	L	1	L	TRUE	M	9	10	0	0.91875	0.93388	2	5
49	LIG1	619	535	H	1	H	TRUE	R	7	10	0	0.72666	0.02489	-0.11111	2.91667
51	LIG1	670	586	L	1	L	TRUE	V	6	10	0	0.68878	-0.15434	0.33333	2
52	LIG1	777	693	H	1	H	TRUE	N	9	10	0	0.8762	0.73252	1	6
54	LIG1	990	906	L	1	L	TRUE	R	5	10	0	0.73095	0.04521	-2	1.22222
55	LIG1	999	915	H	1	H	TRUE	Q	9	10	0	0.89297	0.81188	0	5
56	LIG1	1000	916	D	1	D	TRUE	G	6	10	0	0.65208	-0.32801	-1	2
57	LIG1	1006	922	N	1	N	TRUE	D	8	10	0	0.76739	0.21765	0.88889	5.11111
0	LIMS2	25	25	S	1	S	TRUE	P	5	11	0.18182	0.51136	-1.5444	-0.5	1.71429
1	LIMS2	330	312	H	1	H	TRUE	N	10	11	0	0.8762	0.55004	1	6
260	LRP6	366	57	N	1	N	TRUE	D	10	11	0	0.85147	0.26156	1	6
261	LRP6	434	125	S	1	S	TRUE	G	10	11	0	0.78953	-0.23545	0	6
262	LRP6	525	216	M	1	M	TRUE	L	10	11	0	0.77317	-0.36675	2	4
263	LRP6	543	234	S	1	S	TRUE	G	10	11	0	0.78953	-0.23545	0	6
0	LRRC41	318	318	T	1	T	TRUE	P	10	11	0	0.87156	0.74848	-1	7
1	LRRC41	370	368	T	1	T	TRUE	S	9	11	0.09091	0.75031	-1.1272	1	4
2	LRRC41	380	377	G	1	G	TRUE	A	10	11	0	0.7989	-0.37558	0	4
3	LRRC41	451	448	I	1	I	TRUE	L	10	11	0	0.77317	-0.7736	2	4
4	LRRC41	579	576	N	1	N	TRUE	S	7	11	0	0.65644	-2.57941	0.7	1.75556
5	LRRC41	699	696	T	1	T	TRUE	A	10	11	0	0.7989	-0.37558	0	4
0	LUC7L3	329	329	E	1	E	TRUE	D	9	10	0	0.85147	0.32385	2	6
1	LUC7L3	476	476	S	1	S	TRUE	P	7	10	0	0.75386	-1.53557	-0.55556	3.80556
2	LUC7L3	488	488	P	1	P	TRUE	H	4	10	0	0.73278	-1.93712	-1.55556	1.16667
0	MAEA	140	140	S	1	S	TRUE	N	7	8	0	0.8762	0.66138	1	6
1	MAEA	200	200	E	1	E	TRUE	-	5	8	0.625	0.25675	-1.78055	2	6
2	MAEA	209	209	A	1	A	TRUE	-	5	8	0.625	0.24437	-1.82936	0	4
3	MAEA	210	210	T	1	T	TRUE	-	5	8	0.625	0.2409	-1.84307	0	4
4	MAEA	211	211	N	1	N	TRUE	-	5	8	0.625	0.25227	-1.79824	1	4
5	MAEA	225	225	L	1	L	TRUE	-	5	8	0.625	0.2504	-1.80561	2	4
6	MAEA	230	230	D	1	D	TRUE	-	5	8	0.625	0.25227	-1.79824	2	5
0	MAF1	152	152	D	1	D	TRUE	N	9	10	0	0.8762	0.55424	1	6
0	MAGED1	34	14	Y	1	Y	TRUE	F	10	11	0	0.86927	0.6208	3	6
1	MAGED1	127	51	M	1	M	TRUE	G	5	11	0.18182	0.48035	-0.85905	-2.25	1.85714
2	MAGED1	182	106	N	1	N	TRUE	K	10	11	0	0.8429	0.52045	0	5
3	MAGED1	188	112	H	1	H	TRUE	Q	5	11	0	0.68657	-0.07439	-1.2	0.48889
4	MAGED1	220	144	T	1	T	TRUE	A	10	11	0	0.7989	0.35304	0	4
5	MAGED1	247	171	P	1	P	TRUE	S	10	11	0	0.8366	0.49647	-1	4
6	MAGED1	278	202	N	1	N	TRUE	T	9	11	0	0.76225	0.21358	-0.2	4
7	MAGED1	284	208	T	1	T	TRUE	A	9	11	0	0.71486	0.03326	-0.2	3.2
8	MAGED1	288	212	A	1	A	TRUE	T	5	11	0.18182	0.52299	-0.69681	-0.25	1.64286
9	MAGED1	290	214	P	1	P	TRUE	Q	6	11	0.18182	0.65138	-0.20827	-1.375	2.53571
10	MAGED1	291	215	P	1	P	TRUE	A	7	11	0.18182	0.60013	-0.4033	-1	3
11	MAGED1	300	222	S	1	S	TRUE	G	10	11	0	0.78953	0.3174	0	6
12	MAGED1	354	276	P	1	P	TRUE	A	8	11	0	0.71321	0.027	-1	2.93333
0	MANF	26	20	G	1	G	TRUE	R	7	8	0	0.85365	0.34516	-2	5
1	MANF	39	33	F	1	F	TRUE	Y	7	8	0	0.89297	0.64534	3	7
0	MAP1A	6	6	R	1	R	TRUE	G	6	11	0.18182	0.50846	-1.63682	-1.625	2.75
1	MAP1A	22	22	E	1	E	TRUE	G	9	11	0.09091	0.72432	-0.19589	-2	6
2	MAP1A	26	26	S	1	S	TRUE	P	6	11	0.09091	0.66242	-0.60906	-1.33333	1.75
3	MAP1A	31	31	S	1	S	TRUE	A	8	11	0.09091	0.66836	-0.5694	1	3.11111
5	MAP1A	42	42	E	1	E	TRUE	G	9	11	0.09091	0.72432	-0.19589	-2	6
8	MAP1A	162	161	N	1	N	TRUE	S	7	11	0.09091	0.68517	-0.4572	0.77778	2.86111
9	MAP1A	230	229	Q	1	Q	TRUE	R	9	11	0.09091	0.78313	0.19675	1	5
10	MAP1A	236	235	I	1	I	TRUE	T	6	11	0.09091	0.61122	-0.95083	-0.33333	1.86111
11	MAP1A	556	555	T	1	T	TRUE	A	10	11	0	0.7989	0.302	0	4
13	MAP1A	626	625	V	1	V	TRUE	A	10	11	0	0.7989	0.302	0	4
14	MAP1A	682	681	V	1	V	TRUE	A	8	11	0.09091	0.64331	-0.73666	0	3.11111
15	MAP1A	723	722	I	1	I	TRUE	V	9	11	0	0.71843	-0.23519	2.9	3.4
16	MAP1A	731	730	S	1	S	TRUE	A	5	11	0	0.55346	-1.3364	0.1	1.06667
17	MAP1A	747	745	V	1	V	TRUE	A	10	11	0	0.7989	0.302	0	4
19	MAP1A	756	754	N	1	N	TRUE	A	4	11	0	0.56046	-1.28968	-1	1.33333
20	MAP1A	763	761	M	1	M	TRUE	L	10	11	0	0.77317	0.13024	2	4
22	MAP1A	801	799	V	1	V	TRUE	L	3	11	0.09091	0.51173	-1.61498	-0.22222	-0.11111
23	MAP1A	822	820	R	1	R	TRUE	G	8	11	0	0.68775	-0.43995	-2.2	2.75556
25	MAP1A	836	834	I	1	I	TRUE	V	10	11	0	0.81043	0.37893	3	4
26	MAP1A	837	835	S	1	S	TRUE	P	10	11	0	0.87156	0.78706	-1	7
27	MAP1A	839	837	L	1	L	TRUE	V	5	11	0	0.58367	-1.13477	0.9	1.64444
28	MAP1A	871	869	T	1	T	TRUE	A	9	11	0	0.71556	-0.25436	-0.2	3.2
29	MAP1A	873	871	K	1	K	TRUE	R	5	11	0	0.60146	-1.01601	0	-0.04444
30	MAP1A	877	875	T	1	T	TRUE	R	7	11	0	0.71069	-0.28684	-0.8	2.77778
31	MAP1A	885	882	N	1	N	TRUE	S	10	11	0	0.8366	0.55363	1	4
32	MAP1A	919	916	V	1	V	TRUE	E	10	11	0	0.8366	0.55363	-2	5
34	MAP1A	1033	1030	I	1	I	TRUE	S	8	11	0	0.68506	-0.45793	-2.1	2.62222
35	MAP1A	1164	1161	R	1	R	TRUE	K	10	11	0	0.8429	0.5957	2	5
36	MAP1A	1174	1171	A	1	A	TRUE	S	5	11	0	0.68978	-0.4264	0.1	1.4
37	MAP1A	1178	1175	V	1	V	TRUE	A	10	11	0	0.7989	0.302	0	4
38	MAP1A	1181	1177	-	1	-	TRUE	E	5	11	0.09091	0.61677	-0.9138		0.53333
39	MAP1A	1186	1181	K	1	K	TRUE	E	8	11	0.18182	0.66256	-0.60817	1	5
40	MAP1A	1187	1182	R	1	R	TRUE	T	6	11	0.18182	0.54503	-1.39269	-1.125	2.42857
41	MAP1A	1193	1188	T	1	T	TRUE	S	10	11	0	0.8366	0.55363	1	4
42	MAP1A	1207	1202	T	1	T	TRUE	A	8	11	0	0.69643	-0.38202	0	2.57778
43	MAP1A	1213	1208	R	1	R	TRUE	H	9	11	0	0.8538	0.66848	-0.2	6
44	MAP1A	1222	1217	I	1	I	TRUE	V	5	11	0	0.64861	-0.70123	1.2	1.44444
45	MAP1A	1269	1264	D	1	D	TRUE	A	7	11	0.18182	0.56936	-1.23032	-1.5	2.75
46	MAP1A	1280	1275	V	1	V	TRUE	G	9	11	0	0.72036	-0.22229	-2.9	4.8
47	MAP1A	1290	1285	S	1	S	TRUE	T	9	11	0.09091	0.75294	-0.00481	1	5
48	MAP1A	1310	1305	K	1	K	TRUE	R	10	11	0	0.85365	0.66746	2	5
49	MAP1A	1319	1314	A	1	A	TRUE	V	5	11	0	0.53908	-1.43241	-0.4	1.71111
50	MAP1A	1322	1317	V	1	V	TRUE	A	7	11	0	0.66268	-0.60731	-0.8	1.17778
51	MAP1A	1324	1319	I	1	I	TRUE	G	8	11	0	0.64296	-0.73895	-3.1	3.15556
52	MAP1A	1350	1345	T	1	T	TRUE	P	7	11	0.18182	0.62764	-0.84122	-0.75	5
60	MAP1A	1358	1353	P	1	P	TRUE	T	5	11	0	0.6398	-0.76006	-1	1.84444
61	MAP1A	1367	1362	I	1	I	TRUE	L	9	11	0	0.69711	-0.37748	2.1	3.4
62	MAP1A	1377	1372	Q	1	Q	TRUE	E	10	11	0	0.8366	0.55363	2	5
63	MAP1A	1386	1381	T	1	T	TRUE	V	9	11	0	0.71843	-0.23519	-0.1	3.4
64	MAP1A	1388	1383	L	1	L	TRUE	Q	5	11	0	0.7036	-0.33416	-2.2	1.82222
65	MAP1A	1407	1402	I	1	I	TRUE	V	10	11	0	0.81043	0.37893	3	4
66	MAP1A	1429	1423	K	1	K	TRUE	Q	8	11	0.09091	0.73483	-0.12569	0.77778	3.66667
67	MAP1A	1435	1429	I	1	I	TRUE	L	7	11	0	0.64021	-0.75732	0.8	1.22222
68	MAP1A	1439	1433	I	1	I	TRUE	V	7	11	0	0.61179	-0.94702	1.2	1.06667
69	MAP1A	1443	1437	G	1	G	TRUE	D	10	11	0	0.85147	0.65293	-1	6
70	MAP1A	1447	1441	P	1	P	TRUE	L	10	11	0	0.77317	0.13024	-3	4
75	MAP1A	1494	1485	D	1	D	TRUE	E	10	11	0	0.8366	0.55363	2	5
76	MAP1A	1509	1500	N	1	N	TRUE	H	7	11	0	0.7542	0.00359	0.4	3.15556
77	MAP1A	1510	1501	V	1	V	TRUE	A	8	11	0	0.66671	-0.58041	-0.3	2.28889
78	MAP1A	1522	1513	V	1	V	TRUE	G	6	11	0.09091	0.56952	-1.2292	-2.33333	1.13889
80	MAP1A	1525	1516	S	1	S	TRUE	A	7	11	0.18182	0.57224	-1.21104	1	3
82	MAP1A	1563	1554	S	1	S	TRUE	G	7	11	0	0.70487	-0.32568	0	2.73333
83	MAP1A	1566	1557	-	1	-	TRUE	I	8	11	0.09091	0.7563	0.01765		2.62222
84	MAP1A	1571	1561	N	1	N	TRUE	S	10	11	0	0.8366	0.55363	1	4
85	MAP1A	1597	1587	L	1	L	TRUE	P	10	11	0	0.87156	0.78706	-3	7
86	MAP1A	1607	1597	E	1	E	TRUE	K	6	11	0.36364	0.53198	-1.4798	1	5
87	MAP1A	1617	1607	I	1	I	TRUE	V	7	11	0	0.64475	-0.72703	1.8	1.97778
88	MAP1A	1619	1609	H	1	H	TRUE	Q	10	11	0	0.89297	0.92995	0	5
89	MAP1A	1623	1613	R	1	R	TRUE	K	6	11	0	0.70828	-0.30295	1.5	2.66667
90	MAP1A	1626	1616	H	1	H	TRUE	E	7	11	0	0.65397	-0.66547	-0.3	2.44444
91	MAP1A	1638	1628	T	1	T	TRUE	A	7	11	0	0.56335	-1.27038	-0.3	1.62222
92	MAP1A	1643	1633	G	1	G	TRUE	D	10	11	0	0.85147	0.65293	-1	6
93	MAP1A	1645	1635	T	1	T	TRUE	A	7	11	0	0.68657	-0.44785	0	2.13333
94	MAP1A	1650	1640	V	1	V	TRUE	N	5	11	0	0.70143	-0.34867	-2.9	2.68889
95	MAP1A	1653	1643	L	1	L	TRUE	V	5	11	0	0.62432	-0.86338	-0.7	-0.28889
96	MAP1A	1659	1649	D	1	D	TRUE	A	7	11	0	0.64708	-0.71147	-1.6	2.17778
97	MAP1A	1673	1663	W	1	W	TRUE	A	8	11	0	0.64852	-0.70185	-3	2.62222
98	MAP1A	1678	1668	T	1	T	TRUE	D	4	11	0.09091	0.46916	-1.89914	-0.66667	0.91667
99	MAP1A	1687	1672	V	1	V	TRUE	D	9	11	0.09091	0.75869	0.03355	-3	6
100	MAP1A	1691	1676	Q	1	Q	TRUE	K	6	11	0.09091	0.60438	-0.99653	1	2.33333
101	MAP1A	1693	1678	E	1	E	TRUE	R	4	11	0.09091	0.61877	-0.90043	0.77778	2.44444
102	MAP1A	1694	1679	V	1	V	TRUE	G	4	11	0.18182	0.4267	-2.18263	-1.5	0.39286
103	MAP1A	1700	1685	K	1	K	TRUE	-	7	11	0.63636	0.23325	-3.47397	-1	1
104	MAP1A	1701	1686	I	1	I	TRUE	-	6	11	0.54545	0.32658	-2.85094	-1	4
105	MAP1A	1703	1688	G	1	G	TRUE	-	8	11	0.72727	0.17095	-3.88985	-1	6
106	MAP1A	1704	1689	E	1	E	TRUE	-	8	11	0.72727	0.17928	-3.83421	2	5
107	MAP1A	1713	1693	V	1	V	TRUE	D	8	11	0.18182	0.67769	-0.50714	-3	6
108	MAP1A	1714	1694	T	1	T	TRUE	K	7	11	0.18182	0.60762	-0.97488	-1	4
109	MAP1A	1721	1701	I	1	I	TRUE	R	4	11	0.09091	0.53084	-1.48744	-2.55556	1.52778
110	MAP1A	1732	1712	S	1	S	TRUE	Q	5	11	0.18182	0.63988	-0.75955	-0.375	2
111	MAP1A	1739	1717	K	1	K	TRUE	-	6	11	0.54545	0.25477	-3.33032	-1.75	-1
112	MAP1A	1741	1719	H	1	H	TRUE	-	5	11	0.45455	0.43022	-2.15908	-1	6
113	MAP1A	1742	1720	S	1	S	TRUE	-	5	11	0.45455	0.37919	-2.49976	0	3.4
114	MAP1A	1750	1728	V	1	V	TRUE	-	8	11	0.72727	0.15082	-4.0242	0	-4
115	MAP1A	1753	1731	Q	1	Q	TRUE	-	8	11	0.72727	0.16882	-3.90408	-1	-3
116	MAP1A	1756	1734	Q	1	Q	TRUE	-	8	11	0.72727	0.16218	-3.94839	0	-1
117	MAP1A	1757	1735	T	1	T	TRUE	-	8	11	0.72727	0.15602	-3.9895	-0.5	-2
118	MAP1A	1804	1738	S	1	S	TRUE	D	7	11	0	0.67017	-0.55734	-0.2	2.64444
119	MAP1A	1807	1741	K	1	K	TRUE	L	8	11	0	0.68564	-0.45405	-1.6	1.86667
121	MAP1A	1813	1747	I	1	I	TRUE	A	3	11	0	0.49464	-1.7291	-0.1	-0.37778
122	MAP1A	1821	1755	G	1	G	TRUE	P	9	11	0	0.77511	0.14321	-2.2	5
123	MAP1A	1828	1762	V	1	V	TRUE	L	10	11	0	0.77317	0.13024	1	4
124	MAP1A	1831	1765	R	1	R	TRUE	K	7	11	0.18182	0.60151	-1.0157	1.375	3
125	MAP1A	1834	1768	G	1	G	TRUE	D	6	11	0.18182	0.59932	-1.03027	-0.75	3.35714
126	MAP1A	1849	1783	T	1	T	TRUE	L	4	11	0	0.62587	-0.85306	-1.1	0.06667
127	MAP1A	1860	1794	I	1	I	TRUE	A	8	11	0	0.62809	-0.83826	-0.9	2.42222
128	MAP1A	1861	1795	L	1	L	TRUE	P	8	11	0	0.77795	0.16213	-2.8	4.08889
129	MAP1A	1867	1801	T	1	T	TRUE	A	3	11	0.18182	0.44889	-2.03444	-0.5	0.21429
130	MAP1A	1884	1803	E	1	E	TRUE	Q	8	11	0.09091	0.74039	-0.08861	1.66667	3.66667
131	MAP1A	1885	1804	Q	1	Q	TRUE	K	8	11	0.09091	0.68698	-0.44509	1	4.33333
132	MAP1A	1895	1814	S	1	S	TRUE	A	6	11	0	0.57434	-1.19704	0.1	0.77778
134	MAP1A	1914	1833	S	1	S	TRUE	I	5	11	0	0.60793	-0.97279	-0.6	-0.26667
135	MAP1A	1916	1835	I	1	I	TRUE	A	7	11	0	0.64568	-0.72079	-1.1	2.17778
136	MAP1A	1928	1847	G	1	G	TRUE	-	7	11	0.63636	0.25194	-3.34919	-1	6
137	MAP1A	1936	1855	F	1	F	TRUE	P	4	11	0	0.57055	-1.22231	-2.3	-0.17778
138	MAP1A	1945	1864	L	1	L	TRUE	P	8	11	0	0.70815	-0.30382	-2.7	4.02222
139	MAP1A	1950	1869	V	1	V	TRUE	L	10	11	0	0.77317	0.13024	1	4
140	MAP1A	1959	1878	R	1	R	TRUE	K	7	11	0	0.65328	-0.67008	1.3	2.57778
141	MAP1A	1965	1884	G	1	G	TRUE	E	5	11	0.09091	0.57171	-1.2146	-2.22222	0.94444
142	MAP1A	1985	1904	E	1	E	TRUE	G	4	11	0	0.5173	-1.57782	-0.2	0.2
143	MAP1A	1986	1905	Q	1	Q	TRUE	K	8	11	0	0.71253	-0.27453	1.1	3.64444
144	MAP1A	1987	1906	G	1	G	TRUE	A	8	11	0.09091	0.65798	-0.6387	-0.22222	3.11111
145	MAP1A	1998	1911	D	1	D	TRUE	E	9	11	0	0.76626	0.08412	1.7	4.2
146	MAP1A	1999	1912	R	1	R	TRUE	K	9	11	0	0.77198	0.1223	1.7	3.8
147	MAP1A	2005	1918	G	1	G	TRUE	D	8	11	0	0.69347	-0.40182	-1	3.71111
148	MAP1A	2006	1919	M	1	M	TRUE	V	9	11	0	0.71625	-0.24973	1.1	3.4
149	MAP1A	2016	1929	I	1	I	TRUE	T	6	11	0	0.64142	-0.74924	-1.2	2.2
150	MAP1A	2026	1939	D	1	D	TRUE	E	9	11	0.09091	0.75006	-0.02406	2	5
151	MAP1A	2032	1945	K	1	K	TRUE	E	9	11	0	0.74465	-0.06012	0.7	3.6
152	MAP1A	2077	1989	I	1	I	TRUE	A	10	11	0	0.7989	0.302	-1	4
153	MAP1A	2078	1990	C	1	C	TRUE	R	10	11	0	0.85365	0.66746	-3	5
154	MAP1A	2105	2016	Q	1	Q	TRUE	H	8	11	0	0.8273	0.49155	0.2	5.08889
156	MAP1A	2121	2032	T	1	T	TRUE	P	7	11	0	0.69493	-0.39204	-0.5	2.93333
157	MAP1A	2212	2123	V	1	V	TRUE	L	10	11	0	0.77317	0.13024	1	4
159	MAP1A	2281	2191	S	1	S	TRUE	G	9	11	0	0.72095	-0.21837	0	4.4
160	MAP1A	2287	2197	E	1	E	TRUE	D	10	11	0	0.85147	0.65293	2	6
161	MAP1A	2392	2302	S	1	S	TRUE	P	10	11	0	0.87156	0.78706	-1	7
162	MAP1A	2412	2322	L	1	L	TRUE	P	9	11	0	0.79654	0.28622	-2.9	5.4
163	MAP1A	2447	2357	T	1	T	TRUE	S	10	11	0	0.8366	0.55363	1	4
164	MAP1A	2449	2359	R	1	R	TRUE	S	9	11	0	0.74871	-0.03305	-1.1	3.2
165	MAP1A	2461	2371	V	1	V	TRUE	G	8	11	0	0.63171	-0.81406	-2.6	3.75556
166	MAP1A	2462	2372	Q	1	Q	TRUE	R	9	11	0	0.81292	0.39559	0.9	4
167	MAP1A	2507	2417	Q	1	Q	TRUE	E	10	11	0	0.8366	0.55363	2	5
168	MAP1A	2514	2424	V	1	V	TRUE	S	5	11	0	0.60776	-0.97392	-0.6	0.55556
169	MAP1A	2641	2551	S	1	S	TRUE	P	10	11	0	0.87156	0.78706	-1	7
172	MAP1A	2697	2599	A	1	A	TRUE	P	10	11	0	0.87156	0.78706	-1	7
173	MAP1A	2698	2600	R	1	R	TRUE	G	9	11	0	0.71993	-0.22518	-1.6	4.4
174	MAP1A	2719	2621	L	1	L	TRUE	P	10	11	0	0.87156	0.78706	-3	7
175	MAP1A	2722	2624	C	1	C	TRUE	F	7	11	0	0.76495	0.07538	-1.7	2.13333
176	MAP1A	2726	2628	T	1	T	TRUE	S	10	11	0	0.8366	0.55363	1	4
177	MAP1A	2749	2651	T	1	T	TRUE	A	7	11	0.18182	0.56729	-1.24407	0	3
178	MAP1A	2755	2657	K	1	K	TRUE	E	8	11	0	0.73203	-0.1444	0.6	2.84444
180	MAP1A	2794	2696	S	1	S	TRUE	P	5	11	0	0.73475	-0.12625	-0.6	1.64444
181	MAP1A	2832	2734	F	1	F	TRUE	S	9	11	0	0.79555	0.27963	-2	3
182	MAP1A	2846	2748	L	1	L	TRUE	V	7	11	0	0.63116	-0.81773	0.7	2.37778
183	MAP1A	2849	2751	V	1	V	TRUE	G	10	11	0	0.78953	0.23947	-3	6
184	MAP1A	2857	2759	S	1	S	TRUE	P	10	11	0	0.87156	0.78706	-1	7
185	MAP1A	3016	2918	S	1	S	TRUE	P	7	11	0	0.62409	-0.86496	-1	2.33333
186	MAP1A	3024	2926	T	1	T	TRUE	S	10	11	0	0.8366	0.55363	1	4
187	MAP1A	3052	2954	T	1	T	TRUE	A	10	11	0	0.7989	0.302	0	4
188	MAP1A	3061	2963	S	1	S	TRUE	A	4	11	0	0.61445	-0.92926	-0.4	0.48889
0	MARF1	109	109	S	1	S	TRUE	P	9	10	0	0.87156	0.75496	-1	7
1	MARF1	122	122	S	1	S	TRUE	G	9	10	0	0.78953	-0.23162	0	6
2	MARF1	135	135	T	1	T	TRUE	A	7	10	0	0.70613	-1.23474	0.22222	2.83333
3	MARF1	168	168	S	1	S	TRUE	N	9	10	0	0.8762	0.81068	1	6
4	MARF1	180	180	T	1	T	TRUE	M	9	10	0	0.91875	1.32247	-1	5
5	MARF1	206	206	S	1	S	TRUE	N	9	10	0	0.8762	0.81068	1	6
6	MARF1	207	207	M	1	M	TRUE	V	7	10	0	0.63666	-2.07025	0.33333	1.75
7	MARF1	238	237	R	1	R	TRUE	H	9	10	0	0.91606	1.29008	0	8
8	MARF1	305	304	F	1	F	TRUE	V	4	10	0	0.54961	-3.1172	-1.22222	0.30556
9	MARF1	327	326	T	1	T	TRUE	A	9	10	0	0.7989	-0.11896	0	4
10	MARF1	343	342	T	1	T	TRUE	A	8	10	0	0.70916	-1.1983	-0.22222	3.11111
11	MARF1	346	344	P	1	P	TRUE	A	7	10	0	0.71094	-1.17685	-1	2.47222
12	MARF1	383	381	R	1	R	TRUE	K	9	10	0	0.8429	0.41019	2	5
13	MARF1	647	645	S	1	S	TRUE	N	8	10	0	0.8012	-0.09131	1	4.66667
14	MARF1	668	666	C	1	C	TRUE	S	7	10	0	0.67698	-1.5853	-1.44444	2.08333
15	MARF1	672	670	P	1	P	TRUE	Q	8	10	0	0.84941	0.48845	-1.11111	3.88889
17	MARF1	680	678	T	1	T	TRUE	P	6	10	0	0.65106	-1.89705	-0.88889	1.80556
18	MARF1	683	681	C	1	C	TRUE	R	4	10	0	0.62771	-2.17792	-2.55556	0.55556
19	MARF1	688	686	V	1	V	TRUE	A	6	10	0	0.63822	-2.05147	-0.44444	2.16667
20	MARF1	700	698	L	1	L	TRUE	S	5	10	0	0.68545	-1.48343	-2.22222	1.33333
21	MARF1	704	702	G	1	G	TRUE	T	5	10	0	0.73592	-0.87642	-1.11111	2.61111
23	MARF1	732	730	R	1	R	TRUE	Q	9	10	0	0.89297	1.0124	1	5
24	MARF1	741	739	E	1	E	TRUE	K	8	10	0	0.78867	-0.24205	1.11111	4.11111
25	MARF1	743	741	M	1	M	TRUE	I	7	10	0	0.72527	-1.00458	1	3.61111
26	MARF1	747	745	R	1	R	TRUE	Q	9	10	0	0.89297	1.0124	1	5
27	MARF1	755	753	P	1	P	TRUE	Q	9	10	0	0.89297	1.0124	-1	5
28	MARF1	758	756	T	1	T	TRUE	S	8	10	0	0.74848	-0.72534	0.88889	3.33333
29	MARF1	767	765	F	1	F	TRUE	L	6	10	0.2	0.55845	-3.01083	-0.57143	2
30	MARF1	777	775	S	1	S	TRUE	N	9	10	0	0.8762	0.81068	1	6
31	MARF1	780	778	D	1	D	TRUE	N	7	10	0	0.82534	0.19905	0.55556	4.11111
32	MARF1	787	785	R	1	R	TRUE	C	8	10	0	0.82606	0.20763	-2.88889	6.33333
33	MARF1	860	858	C	1	C	TRUE	Y	8	10	0	0.84792	0.47057	-2.11111	5.88889
34	MARF1	888	886	I	1	I	TRUE	M	9	10	0	0.91875	1.32247	1	5
35	MARF1	927	925	I	1	I	TRUE	T	8	10	0	0.80276	-0.07253	-0.77778	3.66667
36	MARF1	1000	998	R	1	R	TRUE	K	9	10	0	0.8429	0.41019	2	5
37	MARF1	1049	1047	E	1	E	TRUE	Q	3	10	0	0.67616	-1.59521	0.88889	1.08333
38	MARF1	1126	1123	M	1	M	TRUE	I	8	10	0	0.74417	-0.77727	1	3.77778
39	MARF1	1128	1125	S	1	S	TRUE	N	7	10	0	0.82564	0.20262	0.55556	4.11111
40	MARF1	1149	1146	A	1	A	TRUE	S	9	10	0	0.8366	0.3344	1	4
42	MARF1	1216	1213	N	1	N	TRUE	D	9	10	0	0.85147	0.51331	1	6
43	MARF1	1246	1243	Q	1	Q	TRUE	N	4	10	0	0.62167	-2.25053	-0.11111	1.72222
44	MARF1	1532	1529	A	1	A	TRUE	T	9	10	0	0.84502	0.43574	0	5
45	MARF1	1582	1579	H	1	H	TRUE	N	4	10	0	0.63689	-2.06742	-0.44444	1.08333
46	MARF1	1596	1593	L	1	L	TRUE	S	7	10	0	0.76167	-0.56677	-2.22222	2.13889
47	MARF1	1598	1595	A	1	A	TRUE	T	5	10	0	0.6422	-2.0036	-0.44444	0.80556
48	MARF1	1602	1599	T	1	T	TRUE	L	9	10	0	0.77317	-0.42841	-1	4
49	MARF1	1607	1604	S	1	S	TRUE	G	4	10	0.3	0.45484	-4.25699	0	2.26667
50	MARF1	1609	1606	T	1	T	TRUE	D	4	10	0.3	0.48345	-3.91287	-0.33333	2.66667
52	MARF1	1670	1667	N	1	N	TRUE	I	7	10	0	0.68094	-1.53773	-3	2.88889
53	MARF1	1676	1673	S	1	S	TRUE	K	9	10	0	0.8429	0.41019	0	5
54	MARF1	1678	1675	A	1	A	TRUE	E	9	10	0	0.8366	0.3344	-1	5
55	MARF1	1691	1688	Y	1	Y	TRUE	D	7	10	0	0.71481	-1.13032	-2.77778	4.08333
56	MARF1	1703	1700	E	1	E	TRUE	A	6	10	0	0.68484	-1.49076	-1.33333	2
57	MARF1	1704	1701	L	1	L	TRUE	P	9	10	0	0.87156	0.75496	-3	7
58	MARF1	1706	1703	R	1	R	TRUE	C	5	10	0	0.64635	-1.95374	-1.88889	1.44444
59	MARF1	1709	1706	G	1	G	TRUE	S	9	10	0	0.8366	0.3344	0	4
60	MARF1	1710	1707	-	1	-	TRUE	E	9	10	0.1	0.8366	0.3344		5
61	MARF1	1715	1711	P	1	P	TRUE	L	8	10	0	0.72346	-1.0263	-2.77778	2.66667
91	MEMO1	197	197	T	1	T	TRUE	S	8	9	0	0.83656	0.48857	1	4
0	MLH1	92	92	T	1	T	TRUE	A	9	11	0	0.72694	-0.91337	0.1	3.4
1	MLH1	129	129	T	1	T	TRUE	S	5	11	0	0.72159	-0.97652	-0.1	1.57778
2	MLH1	160	160	T	1	T	TRUE	S	5	11	0	0.6216	-2.15698	0.3	1
3	MLH1	209	209	S	1	S	TRUE	N	9	11	0	0.78686	-0.20583	0.9	4.8
[truncated: 3,107 more rows]
